# Supplementary material for: Genetic and Drug Inhibition of LDH-A: Effects on Murine Gliomas
Source: Cancers (Basel). 2022 May 6;14(9):2306. doi: 10.3390/cancers14092306 (PMC9105502; doi:10.3390/cancers14092306)
Supplement: Supplementary file 1 [file cancers-14-02306-s001.zip › Supplementary Information (File2) Table S-4_RNASeq TPM - IC _cancers-1518208.xlsx]

## Sheet: RNASeq TPM - IC - 2022-03-31
Table S-4. RNASeq Transcripts per Million (TPM) values for three glioma cell lines used in this study (GL261, CT2A, ALTS1C1), with either Negative Control (NC) or LDHA Knockdown (KD) shRNA.
Gene_Symbol	GL261_KD_1	GL261_KD_2	GL261_KD_3	GL261_NC_1	GL261_NC_2	GL261_NC_3	CT2A_KD_1	CT2A_KD_2	CT2A_KD_3	CT2A_NC_1	CT2A_NC_2	CT2A_NC_3	ALT_KD_1	ALT_KD_2	ALT_KD_3	ALT_NC_1	ALT_NC_2	ALT_NC_3
4933401J01RIK	0	0	0	0	0	0	0	0	0	0	0	0	0	0	0	0	0	0
GM26206	0	0	0	0	0	0	0	0	0	0	0	0	0	0	0	0	0	0
XKR4	0	0	0	0	0	0	0	0	0	0	0	0	0	0	0	0	0	0
GM18956	0	0	0	0	0	0	0	0	0	0	0	0	0	0	0	0	0	0
GM37180	0	0	0	0	0	0	0	0	0	0	0	0	0	0	0	0	0	0
GM37363	0	0	0	0	0	0	0.03	0	0	0	0	0	0	0	0	0	0	0
GM37686	0	0	0	0	0	0	0	0	0	0	0	0	0	0	0	0	0	0
GM1992	0	0	0	0	0	0	0	0	0	0	0	0	0	0	0	0	0	0
GM37329	0	0	0	0	0	0	0	0	0	0	0	0	0	0	0	0	0	0
GM7341	0	0	0	0	0.0513	0	0	0	0	0	0	0	0	0	0	0	0	0
GM38148	0	0	0	0	0	0	0	0	0	0	0	0	0	0	0	0	0	0
GM19938	0	0	0	0	0	0	0	0	0	0	0	0	0	0	0	0	0	0
GM10568	0	0	0	0	0	0	0	0	0	0	0	0	0	0	0	0	0	0
GM38385	0	0	0	0	0	0	0	0	0	0	0	0	0	0	0	0	0	0
GM27396	0	0	0	0	0	0	0	0	0	0	0	0	0	0	0	0	0	0
GM37381	0	0	0	0	0	0	0	0	0	0	0	0	0	0	0	0	0	0
RP1	0.004	0.0174	0.0078	0	0	0.0084	0.0054	0	0	0	0	0	0	0	0	0.0078	0	0
GM6101	0	0.0288	0	0	0	0	0	0	0	0	0	0	0	0	0	0	0	0
GM37483	0	0	0	0	0	0	0	0	0	0	0	0	0	0	0	0	0	0
SOX17	0	0	0	0	0	0	0	0.0134	0	0	0	0.0133	0	0	0	0.0101	0.0109	0
GM37587	0	0	0	0	0	0	0	0	0	0	0	0	0	0	0	0	0	0
GM7357	0.148	0.0359	0.0644	0	0.0317	0.0344	0.0671	0.0427	0	0	0.0646	0	0.06	0	0	0	0.0174	0.0313
GM22307	0	0.5018	0	0.7521	0	0	0.6254	0	0.5945	0	0.6018	0	0	0.8053	0.4391	0	0	0
GM38076	0	0	0	0	0	0	0	0	0	0	0	0	0	0	0	0	0	0
GM37323	0	0.0194	0	0	0	0	0	0	0	0.0249	0.0232	0	0	0	0	0	0	0
GM7369	0	0	0.0515	0	0	0	0	0	0	0	0	0	0	0	0	0	0	0
GM6085	0.2677	0.3287	0.0983	0.219	0.226	0.2101	0.2731	0.3477	0.476	0.3287	0.219	0.4315	0.1221	0.2931	0.3516	0.23	0.4946	0.2551
GM6119	0.0816	0	0	0.0667	0	0	0.1665	0	0	0.229	0	0	0	0	0.1169	0	0.1723	0.0777
GM25493	0	0	0	0	0	0	0	0	0	0	0	0	0	0	0	0	0	0
GM2053	0	0	0	0	0	0	0	0	0	0	0	0.201	0	0	0	0	0.0823	0
GM6123	0.5983	0.4521	0.1352	0.7528	0.8881	0.4334	0.313	0.5379	0.4165	0.1937	0.1205	0.1187	0.5458	0.5239	0.4395	0.0904	0.4858	0.307
MRPL15	25.2508	24.2	25.5737	20.3434	19.8054	19.5591	12.9313	13.1149	11.9764	13.665	15.5854	15.5744	13.8822	13.3004	13.6853	12.7735	14.0864	13.1399
GM37144	0.1711	0.3268	0.2514	0.14	0.4128	0.3581	0.2328	0.3334	0.3872	0.1201	0.056	0.4964	0.3513	0.487	0.3677	0.168	0.1355	0.0408
LYPLA1	13.5233	14.6244	14.9761	17.4686	17.4995	17.765	10.0121	9.1931	8.0922	7.9805	13.2671	11.6732	11.2695	9.648	11.0279	7.1806	7.0069	7.3414
GM37988	0	0	0	0.0975	0	0.0624	0.1622	0	0	0.4184	0.0781	0	0.1088	0.0522	0.1139	0.1171	0.0629	0
TCEA1	86.2463	89.6467	94.9994	101.398	105.748	107.688	98.4382	95.7907	81.0634	132.803	139.81	116.025	82.7444	69.8887	78.6771	76.3648	92.1791	89.8055
GM6104	1.3054	0.7124	1.4382	0.5338	1.0234	1.195	0.6659	0.8477	0.3165	0.5724	0.2136	0.8415	0.521	0.2858	0.3896	0.3205	0.0861	0.0777
GM37277	0	0.0483	0	0	0	0.0463	0.7228	0.4601	0.7443	0.8078	1.2172	0.8563	0.1212	0.0388	0	0.087	0	0.0422
RGS20	0	0	0	0.0095	0	0	1.6734	1.4923	1.2754	1.4819	1.7319	1.2568	0.4341	0.2846	0.4101	0.1026	0.098	0.1438
GM17100	0	0	0	0	0	0	0	0	0	0	0	0	0	0	0	0	0	0
GM37079	0	0	0	0	0	0	0.0313	0.0299	0	0.097	0	0	0.021	0	0	0.0226	0.0243	0.022
GM16041	0	0	0	0	0	0	0	0.1029	0.0683	0.0927	0.0173	0.0511	0.012	0	0.0252	0.013	0	0
GM17101	0	0	0	0	0	0	0	0	0	0	0	0	0	0	0	0	0	0
ATP6V1H	20.8178	21.3272	21.4494	21.5302	21.7766	22.9582	15.5179	14.902	14.4887	21.0229	20.1202	18.2677	11.9231	9.9068	11.0304	9.9684	11.0731	11.1827
GM7182	0	0	0	0	0	0	0	0	0	0	0	0	0	0	0	0	0	0
GM37567	0	0	0	0	0	0	0	0	0	0	0	0	0	0	0	0	0	0
GM38264	0	0	0	0	0	0	0	0	0	0	0	0	0	0	0	0	0	0
OPRK1	0	0	0	0	0	0	0	0	0	0	0	0	0	0	0	0	0	0
GM36965	0	0	0	0	0	0	0	0	0	0	0	0	0	0	0	0	0	0
GM22463	0	0	0	0	0	0	0	0	0	0	0	0	0	0	0	0	0	0
GM37429	0	0	0	0	0	0	0	0	0	0	0	0	0	0	0	0	0	0
NPBWR1	0	0	0	0	0	0	0	0.0346	0	0	0	0	0	0	0	0	0	0
GM19214	0	0	0	0	0	0	0	0	0	0	0	0	0	0	0	0	0	0
RB1CC1	4.2801	4.3132	4.1685	3.2951	3.7613	3.9629	9.4525	8.908	8.7292	9.9719	10.5868	9.0282	4.69	4.0386	4.3019	4.1569	4.7126	4.8248
4732440D04RIK	0.3807	0.366	0.5237	0.1631	0.2099	0.1612	0.2959	0.3767	0.3164	0.4197	0.2847	0.2688	0.3556	0.4524	0.5107	0.2759	0.3157	0.3023
ALKAL1	0	0	0	0	0	0	0	0	0	0	0	0	0	0	0	0	0	0
GM2147	0	0	0	0	0.0743	0.0806	0	0	0.0995	0	0.1008	0.0993	0.0702	0.0674	0	0.0756	0.0813	0
GM7417	0.104	0	0	0	0	0	0	0.1351	0	0	0	0.1341	0	0	0	0	0	0.0991
GM19026	0.076	0.0474	0.0106	0.0355	0.0105	0	0.0295	0.0564	0.0702	0.1372	0.0426	0.056	0	0.0476	0.0311	0.032	0.0229	0.0103
ST18	0.0076	0.0083	0	0	0	0.008	0.0207	0	0.0394	0.0107	0.01	0	0	0	0	0	0.0241	0.0145
GM42492	0	0	0	0	0	0	0	0	0	0	0	0	0	0	0	0	0	0
GM7449	0	0	0	0	0	0	0	0	0	0	0	0	0	0	0	0	0	0
GM37108	0.2358	0.4289	1.3084	0.5142	0.455	0.74	1.069	0.8166	1.0161	1.1028	0.5144	2.229	1.434	0.8947	1.1258	1.0804	1.2444	1.7972
GM37275	0	0	0	0	0	0	0	0	0	0	0	0	0	0	0	0	0	0
GM37225	0	0	0	0	0	0	0	0	0	0	0	0	0	0	0	0	0	0
GM37489	0	0	0	0	0	0	0	0	0	0	0	0	0	0	0	0	0	0
GM5694	0	0	0.0752	0	0.0741	0	0	0.0997	0	0	0	0	0.2101	0.0672	0.4398	0	0	0
PCMTD1	7.3493	7.6339	9.3113	6.9298	7.6975	8.5323	12.5813	11.8304	9.8364	11.9516	12.0589	10.3899	3.3524	3.4317	3.693	6.0769	5.9941	6.136
GM26983	0.5072	0.2768	0.1242	0.1037	0.1223	0.1327	0.1725	0.3294	0.8197	0.1779	0	0	0	0.4442	0	0	0.4015	0.1208
GM38372	0.0366	0.12	0.0598	0.0999	0.0354	0.0639	0.1994	0.2538	0.1737	0.1028	0.1919	0.2992	0.1226	0.0642	0.2566	0.2399	0.2192	0.3026
GM9826	0.9847	0.8267	0.7418	0.8983	0.9867	0.7132	0.4121	1.0821	0.5386	1.2223	0.7932	0.7324	1.1402	0.8623	0.9043	0.595	0.7596	0.4691
NRAS-PS2	0	0	0	0	0	0	0	0	0	0	0	0	0	0	0	0	0	0
GM23274	0	0	0	0	0	0	0	0	0	0	0	0	0	0	0	0	0	0
GM19002	0	0	0	0	0	0	0	0	0	0	0	0	0	0	0	0	0	0
GM26901	0.0227	0.0124	0.1443	0.0278	0.0328	0.0237	0.0154	0.0442	0.044	0.0159	0.0445	0.0731	0.0414	0.0794	0.0325	0	0.012	0.0216
GM18984	0	0	0	0	0	0	0	0	0	0	0	0	0	0	0	0	0	0
GM30414	0	0	0	0	0	0	0	0	0	0	0	0	0	0	0	0	0	0
GM37791	0	0	0	0	0	0	0	0	0	0	0	0	0	0	0	0	0	0
GM7470	0	0	0	0	0	0	0.0319	0	0	0	0	0	0	0	0	0	0	0
RPS2-PS2	0.0558	0	0	0	0	0	0	0	0	0	0	0	0.0509	0	0.0533	0	0	0
GM38216	0	0	0	0	0	0	0	0	0	0	0	0	0	0	0	0	0	0
SNTG1	0.0045	0	0	0	0	0	0.0613	0.0117	0.0058	0.019	0.0236	0.0116	0	0	0	0	0.0048	0
GM38024	0	0	0	0	0	0	0	0	0	0	0	0	0	0	0	0	0	0
GM16284	0	0	0	0	0	0	0	0	0	0	0	0	0	0	0	0	0	0
GM38259	0	0	0	0	0	0	0	0	0	0	0	0	0	0	0	0	0	0
GM23358	0	0	0	0	0	0	0	0	0	0	0	0	0	0	0	0	0	0
GM37005	0	0	0	0	0	0	0	0	0	0	0	0	0	0	0	0	0	0
GM15452	0.82	1.7898	1.8067	1.0059	1.5823	0.8579	1.1153	1.5974	3.7104	1.1505	1.6099	0.7928	1.3091	1.4361	1.7619	0.4026	1.2983	0.5859
GM36964	11.9266	13.5595	12.1663	15.0379	11.0282	12.2182	16.8988	19.6851	17.9898	19.5244	15.6116	10.8913	10.6541	10.0095	11.153	14.6395	12.59	13.2578
GM24276	18.3372	24.407	23.6512	19.3866	19.4192	16.3776	38.3265	46.4697	38.7423	39.5369	26.3445	27.1002	14.689	14.1003	21.784	16.6891	25.9668	23.8641
GM6152	0	0	0.2834	0.1183	0	0	0	0	0	0.203	0	0	0	0	0	0	0.3055	0
GM7445	0	0	0.1417	0	0	0	0.3936	0.1879	0	0	0	0	0.132	0	0	0	0	0
GM7493	0.1572	0.0858	0	0.0643	0.1517	0	0.2138	0	0	0.1103	0.3086	0	0.2151	0.1376	0.0751	0	0.1659	0.0749
GM37629	0	0	0	0	0	0	0	0	0	0	0	0	0	0	0	0	0	0
GM38008	0	0	0	0	0	0	0	0	0	0	0	0	0	0	0	0	0	0
GM37143	0	0	0	0	0	0	0	0	0	0	0	0	0	0	0.0144	0	0	0
GM6187	0.0512	0	0.0502	0.0838	0.0989	0.1609	0.1394	0.0666	0.1988	0.0719	0.0671	0	0.1403	0.1346	0	0.151	0.0541	0.0488
GM18299	0	0	0	0	0	0	0	0	0	0	0	0	0	0	0	0	0	0
GM7512	0	0	0.0412	0	0	0	0	0	0	0	0	0	0	0	0	0	0	0.0401
GM24765	0	0	0	0	0	0	0	0	0	0	0	0	0	0	0	0	0	0
GM18300	0	0	0	0.0286	0	0.0366	0.0476	0	0	0	0	0	0	0	0	0	0	0.0333
RRS1	131.137	132.587	123.481	81.8481	83.3492	90.8558	47.9349	45.6131	49.5686	34.4826	102.162	97.3688	68.5519	61.1763	56.8272	60.5061	55.9402	52.7126
ADHFE1	1.705	2.0455	1.9883	0.5855	0.7535	0.463	0.4603	0.2536	0.2356	0.2557	0.5622	0.4027	0.38	0.3077	0.2983	0.1406	0.2885	0.1364
2610203C22RIK	0.1804	0.339	0.2649	0.9506	1.2085	1.0378	0.1772	0.2082	0.2202	0.2109	0.1705	0.155	1.1975	0.9038	0.8421	0.2853	0.1692	0.21
GM6161	0	0	0	0.073	0	0	0	0	0	0	0	0.1151	0	0.0391	0	0	0.1414	0
3110035E14RIK	0.0907	0.1154	0.0444	0.0989	0.1166	0.079	0.0411	0	0	0.0212	0	0	0.1241	0.0397	0.0866	0.0148	0.016	0.0144
GM29520	0	0	0	0	0	0	0	0	0	0	0	0.0594	0	0	0	0	0	0
MYBL1	13.2693	14.5322	13.6455	10.3012	12.1529	12.2154	10.1705	8.2442	8.5131	8.9198	8.3209	8.4419	3.0659	2.5043	2.705	1.887	1.7689	1.9004
VCPIP1	5.0868	5.64	5.1247	3.7847	3.9343	4.6567	4.4617	4.1618	4.1365	3.583	4.3729	4.2809	3.766	2.7444	2.8531	2.7998	2.7967	3.0485
1700034P13RIK	0.349	0.4502	0.4039	0.2725	0.2449	0.2324	0.1295	0.2473	0.2461	0.0445	0.2492	0.5318	0.275	0.4029	0.3333	0.2181	0.1005	0.3174
SGK3	1.9183	1.9886	2.0906	1.2343	1.3765	1.5286	0.0468	0.0446	0.0311	0.0048	0.0135	0.0133	0	0.006	0.0033	0.0068	0.0036	0.0033
GM6195	0.4134	0.1504	0.2699	0.3381	0.7978	0.2884	0.1874	0.179	0	0	0	0	0.1257	0.2414	0.1316	0.1353	0	0.3939
GM22607	0	0	0	0	0	0	0	0	0	0	0	0	0	0	0	0	0	0
MCMDC2	0.1663	0.1997	0.2117	0.2312	0.3049	0.2001	0.2489	0.2052	0.172	0.2217	0.3701	0.4074	0.129	0.0728	0.1747	0.2042	0.2195	0.206
SNHG6	110.372	114.653	115.275	87.7056	88.5594	82.239	120.758	121.491	127.88	111.561	110.814	109.639	80.0533	88.4618	93.9292	170.773	186.571	209.469
SNORD87	11.8752	12.961	10.5217	11.0997	12.0037	8.8745	8.4611	8.0788	8.0422	13.4891	23.6865	29.1614	9.2862	8.4188	5.4006	9.9953	5.9694	5.388
TCF24	0	0	0	0	0	0	0	0	0	0	0	0	0	0	0	0	0	0
E330040D14RIK	0	0	0	0	0	0	0	0	0	0	0	0	0	0	0	0	0	0
PPP1R42	0.0646	0.0705	0	0	0	0	0	0.042	0	0.0453	0.0846	0.1249	0.0884	0	0	0.0317	0	0
GM15818	0	0	0	0	0	0.0785	0	0	0.097	0	0	0	0	0	0	0	0	0
GM24674	0	0	0	0	0	0	0	0	0	0	0.6192	0	0	0	0	0	0	0
COPS5	37.3226	39.0668	37.4067	36.7534	36.0998	38.6794	21.5364	20.8009	19.6597	28.9439	31.9082	31.0057	24.992	20.8099	22.3447	16.638	16.9756	16.2186
CSPP1	1.2949	1.2481	1.279	1.3135	1.4252	1.343	1.0942	1.2959	1.0436	1.0619	1.0346	1.2538	1.4498	1.3917	1.6248	1.1917	1.3728	1.3112
1700047N06RIK	0	0.1751	0	0	0	0	0.0727	0	0	0.1501	0.07	0.2068	0	0	0	0.0525	0.2822	0.1019
ARFGEF1	11.606	12.5723	11.5231	8.0736	8.8286	9.7278	6.9533	6.5996	6.6428	6.319	8.5177	7.5486	10.0251	7.1947	7.7091	7.0302	6.4515	7.3474
GM26348	0	0	0	0.503	0	0.4289	0.2788	0.2662	0.265	0	0	0	0.187	0.359	0.3915	1.2078	0	0.1953
GM37569	0.2286	0.0935	0.1958	0.2103	0.1378	0.2092	0.0389	0.0371	0.2586	0.0401	0.2244	0.0737	0.2085	0.1001	0.2456	0.1403	0.1206	0.2178
CPA6	0.0072	0.0079	0	0	0	0	0	0	0	0	0	0	0.1706	0.1386	0.1305	0.445	0.4024	0.4592
GM38005	0	0	0	0	0	0	0	0	0	0	0	0.0231	0	0	0	0.0176	0	0.0171
GM15604	0	0.1106	0.0662	0.1105	0.0326	0.0707	0	0	0.0437	0	0.0442	0.0436	0	0.0296	0	0.0332	0	0
GM25253	0	0	0	0	0	0	0	0	0	0	0	0	0	0	0	0	0	0
GM15603	0	0	0	0	0	0	0	0	0	0	0	0	0	0	0	0	0	0
GM37133	0	0	0	0	0	0	0	0	0	0	0	0	0	0	0	0	0	0
GM5522	0	0	0	0	0	0	0	0	0	0	0	0	0	0	0	0	0	0
GM28659	0.0648	0	0	0.106	0.1251	0.0678	0.0882	0	0	0.091	0.0848	0.4178	0.0591	0	0.0619	0.0637	0.1368	0
GM22963	0	0	0	0	0	0	0	0	0	0	0	0	0	0	0	0	0	0
PREX2	0.0592	0.1035	0.0522	0.0024	0.0114	0.0093	0	0.0038	0	0	0.0155	0	0.0054	0.0052	0.0085	0.0262	0.0188	0.0169
GM24173	0	0	0	0	0	0	0	0	0	0	0	0	0	0	0	0	0	0
GM28686	0	0	0	0	0	0	0	0	0	0	0.1057	0	0	0	0	0	0	0
GM37410	0	0	0	0	0	0	0	0	0	0	0	0	0	0	0	0	0	0
A830018L16RIK	0.0054	0.0234	0	0	0.0052	0	0	0	0	0	0	0.0069	0	0	0.0051	0	0	0.0051
GM38178	0.0199	0	0	0	0	0	0	0	0	0	0	0	0	0	0	0	0	0
GM29273	0	0	0	0	0	0	0	0	0	0	0	0	0	0	0	0	0	0
GM38069	0	0	0	0	0	0	0	0	0	0	0	0	0	0	0	0	0	0
GM7560	0.5072	0.3075	0.4415	0.3226	0.2719	0.059	0.0767	0.5123	0.0729	0.5535	0.2951	0.7265	0.6169	0.4935	0.4306	0.166	0.1785	0.1611
GM22633	1.3794	1.5055	0	0.376	0.8873	0	2.5017	0.5972	0.5945	0	0.6018	0	0.4195	1.208	0	0	0	0
MIR6341	0	0	0	0	0	0	0	0	0	0	0	0	0	0	0	0	0	0
GM2383	0.1219	0	0	0.0499	0	0	0	0	0.0788	0	0.0798	0	0	0	0.0582	0	0	0
GM6216	0	0	0	0	0	0	0	0	0	0	0	0	0	0	0	0	0	0
GM17644	0	0	0	0	0	0	0	0	0	0	0	0	0	0	0	0	0	0
GM29663	0	0	0	0	0	0	0	0	0	0	0	0	0	0	0	0	0	0
SULF1	0.1089	0.0998	0.0725	0	0.0084	0	0	0.0057	0	0.0244	0.0114	0.0112	0.004	0	0	0	0	0
SLCO5A1	0.0075	0.0041	0.0073	0	0.0072	0.0078	4.661	4.6401	5.1323	2.9427	3.8775	4.0845	0.0034	0.0033	0.0072	0.0037	0.004	0
GM37162	0	0	0	0	0	0	0	0	0	0	0	0	0	0	0	0	0	0
GM5250	0	0	0	0	0	0	0	0	0	0	0	0	0	0	0	0	0	0
GM29283	0	0	0	0.1397	0	0.1787	0.2324	0.2219	0.2209	0	0	0	0	0	0	0	0	0.1628
PRDM14	0.0192	0.0209	0	0	0	0	0.0261	0.0498	0.0744	0.0538	0.0251	0	0	0	0.0183	0	0	0
NCOA2	4.6266	4.902	4.5	2.9325	3.0408	3.3598	3.8718	3.3741	4.0623	3.0275	4.5451	4.2535	3.0473	2.534	2.376	2.8044	2.4768	2.4873
GM38376	0.0218	0.0953	0.1497	0.0714	0.2107	0.0914	0.1188	0.2269	0.1129	0.337	0.1429	0.2815	0.1594	0.1147	0.146	0.0643	0.1153	0.1248
GM37409	0.0605	0	0.0296	0.0495	0.0292	0.0633	0.0823	0.1179	0	0	0.1188	0	0.0276	0.053	0.0578	0.0297	0	0.0288
GM27881	0	0	0	0	0	0	0	0	0.7757	0	0	0	0	0	0.573	0	0	0
GM38223	0	0	0.0693	0	0	0	0	0	0	0	0	0	0.0646	0.062	0.0676	0	0	0.2698
GM37702	0	0.0861	0.0772	0.0215	0.0507	0	0	0	0	0	0.0344	0.0678	0	0	0.0502	0.0516	0	0.1002
GM23169	0	0.9588	0	0	0	0	0	0	0	0	0	0	0	0	0	0	0.4637	0.8371
GM38120	0.0424	0.0463	0.0623	0.0087	0	0.0665	0.0288	0.0138	0.0274	0.0149	0.0277	0	0.029	0	0.0607	0.052	0.1454	0.0101
GM38380	0.0875	0	0	0	0	0	0	0.1421	0.0566	0	0.0286	0	0	0.0575	0	0.0215	0	0.0209
GM29570	0	0	0	0	0	0	0	0	0	0	0	0	0	0.0633	0	0.0709	0	0
GM7593	0.0764	0.0834	0	0.0625	0	0.2398	0	0	0	0	0.1	0.2955	0.0697	0	0	0	0.0806	0.0728
TRAM1	128.003	141.184	131.675	160.335	172.252	181.276	81.1836	77.2327	70.5468	143.72	133.561	120.092	91.9664	86.1276	91.6522	66.3696	70.9529	69.0687
LACTB2	12.6064	12.2538	12.9151	15.3508	16.6028	15.9625	5.6279	5.4856	4.7642	2.676	3.54	3.1255	9.8397	8.8792	9.7242	12.4426	13.2621	14.496
GM38319	0.1554	0.1272	0.0761	0.0953	0.1125	0.0407	0.0529	0.0505	0	0.1636	0	0	0.0355	0.0681	0.0371	0.0763	0.2461	0.0741
XKR9	0.0511	0.0279	0.025	0	0	0.0267	0	0.0332	0	0	0	0	0	0	0.0488	0	0	0
GM26273	0	0	0	0	0	0	0	0	0	0	0	0	0	0	0	0	0	0
GM5523	0.0987	0.1077	0.0966	0.2421	0.0476	0.1033	0	0.0641	0	0.277	0.1292	0.0636	0	0	0.0943	0	0	0.1411
GM36947	0	0.0239	0.0214	0	0	0	0	0	0	0	0	0	0	0	0	0	0.0462	0
GM25491	0	0	0	0	0	0	0	0	0	0	0	0	0	0	0	0	0	0
GM37400	0	0	0	0	0	0	0	0	0	0	0	0	0.0374	0	0	0	0	0
EYA1	0.0189	0.0894	0.0555	0	0.0061	0	0.42	0.4174	0.2607	0.2652	0.2392	0.2112	10.8011	9.833	10.1336	7.2701	7.1435	6.772
GM22616	0	0	0	0	0	0	0	0	0	0	0	0	1.3465	1.2925	0.9397	0.4831	0.5193	0.4688
GM37444	0	0	0	0	0	0	0	0	0	0	0	0	0	0.1963	0.107	0	0.2366	0.1068
GM9947	0	0	0	0	0	0	0	0.0179	0	0	0	0	0	0	0	0	0	0
MSC	0	0	0	0	0	0	0	0	0	0	0	0	0	0	0	0	0	0
GM37412	0	0	0	0	0	0	0	0	0	0	0	0	0	0	0	0	0	0
SMT3H2-PS4	0.5125	0.9322	1.5056	0.4191	0.6593	0.3574	1.3942	1.1093	1.1043	0.7191	0.8944	1.3214	1.0909	1.0472	0.9789	1.0065	0.3606	0.6511
RPL5-PS1	3.1367	2.5827	2.5329	3.5106	3.3451	2.5909	10.0304	8.0048	8.3955	5.7913	4.8262	4.1149	8.5348	8.9156	8.8294	8.8083	10.1079	7.6029
TRPA1	0	0	0	0	0	0	0	0	0	0	0	0	0	0	0	0	0	0
GM26345	0	0	0	0	0	0	0	0	0	0	0	0	0	0	0	0	0	0
GM10566	0.0494	0	0.0967	0.202	0.143	0.155	0.0672	0.2566	0.1277	0.2772	0.0647	0.0637	0.0451	0.0865	0.0472	0.097	0	0.0471
KCNB2	0	0	0	0	0	0	0	0	0	0	0	0.0042	0.0207	0.0085	0.0031	0.0382	0.0068	0
GM38116	0	0	0	0	0	0	0	0	0	0	0	0	0	0	0	0	0	0
GM37138	0	0	0	0	0	0	0	0	0	0	0	0	0	0	0	0	0	0.0449
GM25227	0	0	0	0	0	0	0	0	0	0	0	0	0	0	0	0	0	0
GM25168	0	0	0	0	0	0	0	0	0	0	0	0	0	0	0	0	0	0
GM6060	0	0	0.1919	0	0	0	0	0	0.2534	0	0	0	0	0	0	0	0	0
GM28669	0	0	0	0.4024	0	0	0	0	0	0	0	0	0	0	0	0	0	0
TERF1	3.5019	4.2299	3.6176	3.9468	3.9352	4.2223	5.838	5.6852	6.0322	2.337	4.3463	4.9139	3.2338	3.2257	3.5178	3.7952	3.7868	3.5503
GM37509	0.0155	0	0	0.0254	0	0	0.0422	0.0403	0.1004	0.1089	0	0.04	0.0425	0	0.0297	0.0305	0	0.0296
SBSPON	0.0179	0	0	0	0	0.0375	0	0.0465	0.0463	0	0.0469	0.0462	0	0	0	0.0352	0	0
GM23259	0	0	0	0	0	0	0	0	0	0	0	0	0	0	0	0	0	0
GM7634	0.089	0	0	0.0728	0	0	0.121	0	0.115	0	0	0	0	0	0	0	0	0
4930444P10RIK	0.0715	0	0.0234	0.0585	0	0	0	0.0929	0.0308	0	0	0	0	0	0.0456	0.0234	0	0
RPL7	1083.07	1082.3	1116.28	1135.78	1138.16	1137.7	1221.26	1222.91	1192.72	1077.14	979.316	888.271	1234.56	1199.45	1277.6	1250.05	1328.72	1344.3
RDH10	4.7542	5.5761	4.6673	3.5981	3.8797	3.6748	13.6573	13.3167	13.3941	17.5901	18.9942	16.0242	20.8124	20.8379	21.2675	10.1266	9.0384	9.4766
GM38249	0	0	0	0	0	0	0	0	0	0	0	0	0	0	0	0	0	0
GM28095	0.0325	0	0	0	0	0	0.0883	0	0	0	0.085	0	0	0.0284	0	0	0	0
STAU2	1.3927	1.3529	1.2996	0.8468	0.7739	0.8697	3.283	3.1347	2.5831	3.315	3.8083	3.7132	2.2817	2.1392	2.2633	2.3199	2.3785	2.3205
GM7568	0	0	0	0	0	0	0	0.0637	0	0	0	0	0	0	0	0	0	0
UBE2W	13.6216	14.8452	15.0106	11.0997	11.5544	12.0172	20.5645	19.9593	17.0177	16.7051	17.2293	14.2934	7.6383	6.9914	8.2438	12.4745	15.0112	14.6998
GM38342	0.2641	0.1622	0.1778	0.108	0.1434	0.2245	0.2919	0.2359	0.1921	0.0232	0.0648	0.1277	0.1356	0.159	0.205	0.1783	0.366	0.0629
ELOC	38.2231	41.771	44.4687	24.6924	23.9071	23.5419	52.1024	51.3109	45.6556	69.5118	68.8456	60.4916	41.3826	36.3497	39.9513	32.5689	37.4656	33.6621
D030040B21RIK	0.0176	0.0578	0.0346	0.0866	0.0511	0.2031	0.312	0.0229	0.1141	0.4705	0.3003	0.3867	0.1771	0.17	0.2022	0.0866	0.1118	0.1681
GM7654	0	0	0.1411	0.1767	0.139	0.3014	0.196	0.2807	0.1863	0.1011	0	0.0929	0.2629	0.1892	0.1376	0.2122	0.4562	0
TMEM70	57.9286	60.5992	61.8378	55.6014	56.2327	54.9793	54.9695	53.3284	50.3263	69.3741	66.9808	65.3776	47.8918	43.1553	43.3192	50.5137	55.2722	56.8693
LY96	6.2641	5.8902	5.9928	4.8473	5.5326	6.0496	6.2266	4.8188	5.6692	5.5443	5.7397	5.3424	2.7255	2.8695	3.0833	3.1702	4.6288	2.7547
GM29649	0	0	0	0	0	0	0	0	0	0	0	0	0	0	0	0	0	0
GM5828	0.1852	0.2887	0.0518	0.1298	0.2042	0.1937	0.036	0.0687	0.0342	0.0742	0.0346	0.0341	0.0724	0.0695	0.101	0.0779	0.0279	0.0504
GM28376	0	0	0	0	0	0	0	0	0	0	0	0	0	0	0	0	0	0
4921511E07RIK	0	0	0	0	0	0	0	0	0	0	0	0	0	0	0	0	0	0
JPH1	0.0098	0	0	0	0	0	0	0	0	0	0	0	0	0	0	0	0	0
GM28783	0	0	0	0	0	0	0	0	0	0	0	0	0	0	0	0	0	0
GDAP1	0	0	0	0.0052	0.0061	0	0	0	0.0082	0	0	0	0	0.0111	0	0	0	0.0061
GM28784	0	0	0	0	0	0	0	0	0	0	0	0	0	0	0	0	0	0
GM28785	0	0	0	0	0	0	0	0	0	0	0	0	0	0	0	0	0	0
GM5251	0.2085	0.1138	0	0	0	0	0.1418	0	0	0	0.4093	0.2688	0.0951	0	0.1991	0.1024	0	0.1986
RBM6-PS1	0.0686	0.1497	0.0671	0.0701	0.0496	0.0717	0.07	0.1113	0.0887	0.1203	0.1571	0.0663	0.0313	0.0901	0.0491	0.0673	0.0543	0.0163
GM6075	0.1012	0	0	0.1656	0.0977	0	0	0	0.1309	0	0	0.1305	0.0924	0	0	0	0.3206	0
GM25166	0	0	0	0	0	0	0	0	0	0	0	0	0	0	0	0	0	0
PI15	0.0071	0	0.007	0.0174	0	0	4.2531	3.8118	3.4178	0.4587	0.6325	0.6505	0	0	0.0068	0.1186	0.165	0.1828
GM28154	0	0	0	0	0	0	0.0476	0.0151	0.0302	0	0	0	0	0	0	0	0	0
GM16070	0	0	0	0	0	0	0	0.0077	0	0	0	0.0076	0	0	0	0	0	0
CRISPLD1	0	0	0.0107	0	0.0105	0	0.163	0.1274	0.2395	0.0153	0.0428	0.0281	0	0	0	0	0.0345	0
GM28153	0	0	0	0	0	0	0	0	0	0	0	0	0	0	0	0	0	0
GM7690	0	0	0.0689	0	0	0.0368	0.1435	0	0	0.0493	0.046	0.0453	0	0	0	0	0	0.0335
GM18775	0	0	0	0	0	0	0	0	0	0	0	0	0	0	0	0	0	0
GM17969	0	0	0	0	0	0	0	0	0	0.027	0.0252	0	0	0.0168	0	0.0189	0	0
GM28756	0	0	0	0	0	0	0	0	0	0	0	0	0	0	0	0	0	0
GM28755	0	0	0	0	0	0	0	0	0	0	0	0	0	0	0	0	0.261	0
GM45784	0	0	0	0	0	0	0	0	0	0	0	0	0	0	0	0	0	0
CRISP4	0	0	0	0	0	0	0	0	0	0	0	0	0	0	0	0	0	0
DEFB44-PS	0	0	0	0	0	0	0	0	0	0	0	0	0	0	0	0	0	0
DEFB18	0	0	0	0	0	0	0	0	0	0	0	0	0	0	0	0	0	0
DEFB41	0	0	0	0	0	0	0.2194	0	0	0.1132	0	0	0	0	0	0	0	0
GM17837	0	0.0545	0	0	0	0	0	0	0	0	0	0	0	0	0	0	0.1054	0.0952
GM5252	0	0	0	0	0	0	0	0	0	0	0	0	0	0	0	0	0	0
GM24075	0	0	0	0	0	0	0	0	0	0	0	0	0	0	0	0	0	0
GM28343	0	0	0	0	0	0	0	0	0	0	0	0	0	0	0	0	0	0
GM28344	0	0	0	0	0	0	0	0	0	0	0	0	0	0	0	0	0	0
GM15825	0	0	0	0	0	0	0	0	0	0	0	0	0	0	0	0.1579	0.0566	0.0511
TFAP2D	0	0	0	0	0	0	0	0	0	0	0	0	0	0	0	0	0	0
GM10075	0.3611	0.3941	0.442	0.443	0.5226	0.6611	0.4912	0.2345	0.2334	0.8867	0.1182	0.2328	0.1647	0.2372	0.2586	0.0886	0.1906	0.172
TFAP2B	0.0233	0.0254	0.0076	0	0.015	0.0081	0.0106	0	0.01	0	0	0	0.0071	0	0.0074	0.061	0.0492	0.0814
GM28340	0	0	0	0	0	0	0	0	0	0	0	0	0	0	0	0	0	0
GM28341	0	0	0	0	0	0	0	0	0	0	0	0	0	0	0	0	0	0
GM4849	0.0438	0.0478	0.0215	0.0717	0.0211	0.0229	0.0596	0	0.0566	0	0.086	0.0282	0.06	0	0.1046	0.0215	0.0231	0.0209
GM24633	0	0	0	0	0	0	0	0	0	0	0	0	0	0	0	0	0	0
GM38382	0	0	0	0	0	0	0	0	0	0	0	0	0	0	0	0	0	0
PKHD1	0.1306	0.1576	0.1178	0.343	0.2886	0.3417	0	0	0	0	0.0045	0.0044	0.0188	0.0211	0.0197	0.0776	0.0726	0.0786
GM37315	0	0	0	0	0	0.0148	0	0	0	0	0	0	0	0	0	0	0	0
4930486I03RIK	0	0	0	0	0	0	0	0	0	0	0	0	0	0	0	0	0	0
GM15795	0.1779	0.2913	0.3485	0.2183	0.1717	0.7446	0.121	0.3466	0.3451	0.1248	0	0	0.3247	0.3896	0.2549	0.1747	0.5635	0.5086
GM24162	0	0	0	0	0	0	0	0	0	0	0	0	0	0	0	0	0	0
MIR206	0	0	0	0	0	0	0	0	0	0	0	0	0	0	0	0	0	0
GM28653	0	0	0	0	0	0	0	0	0	0	0	0	0.017	0.0163	0	0.0092	0	0
MIR133B	0	0	0	0	0	0	0	0	0	0	0	0	0	0	0	0	0	0
IL17A	0	0	0	0.0344	0.1216	0	0	0	0	0	0	0	0	0	0	0	0	0
IL17F	0	0	0	0.0398	0	0.0255	0	0.0316	0.0315	0.0683	0.0637	0	0	0.0852	0.0232	0.0239	0.0257	0.0232
MCM3	173.083	177.931	168.265	141.814	148.67	162.072	66.634	62.0395	68.1841	102.629	107.496	106.752	102.375	89.7282	85.8179	60.916	56.8889	54.0223
GM20587	0	0	0	0.0679	0.04	0.1736	0	0	0	0	0	0	0	0.0363	0	0	0	0
GM28065	0	0	0	0	0	0	0	0	0	0	0	0	0	0	0	0	0.0623	0
GM24723	0	0	0	0	0	0	0	0	0	0	0	0	0	0	0.3559	0	0	0
6720483E21RIK	0.3953	0.4315	0.086	0.1078	0.1695	0.0919	0	0	0.0568	0	0	0	0.0801	0.0385	0	0.2157	0.2318	0.293
PAQR8	1.6853	2.0155	2.2123	1.5763	1.7645	1.8946	1.0365	0.9198	0.9156	0.5535	0.6689	0.705	0.8914	1.0598	0.976	1.6021	1.6466	1.6229
GM24171	0	0	0	0	0	0	0	0	0	0	0	0	0	0	0	0	0	0
GM28064	0	0	0	0	0	0	0	0	0	0	0	0	0	0	0	0	0	0
EFHC1	0.6239	0.5836	0.7201	1.1481	1.0964	1.1423	0.5455	0.3762	0.4321	0.2501	0.2042	0.2298	1.24	0.8781	1.4683	2.3849	2.1639	1.8046
TRAM2	2.1493	2.6279	1.9601	0.8336	1.012	1.3059	0.6832	0.6235	0.5157	0.7255	0.6477	0.8284	1.3274	0.718	0.7477	0.7325	1.0058	0.8374
GM28287	0.1802	0.1967	0.0882	0	0.0869	0.1885	0	0	0	0.1264	0	0	0.411	0.2367	0.4303	0.177	0.1902	0.1717
GM2693	0.2585	0.1881	0.0844	0.0705	0	0.0901	0.2344	0.5595	0.8912	0.6045	0.7895	1.1108	0.3144	0.3018	0	0	0	0
TMEM14A	2.9861	2.9014	3.3878	4.5568	4.3218	3.7337	3.8636	2.2702	2.4482	2.7082	2.574	3.3333	2.4917	2.2323	1.7737	0.7867	0.6151	1.0756
GM38224	0.0234	0.0767	0	0	0.0226	0.0245	0.0637	0.0609	0	0.0329	0.0307	0.0302	0.0855	0.0821	0.0895	0.069	0.0247	0.0223
GSTA3	0.034	0.0124	0.0111	0	0.0219	0.0118	0.1232	0.0588	0.1318	0.0159	0.0296	0.0438	0.0103	0.0298	0.0216	0.0111	0.0717	0.0863
GM28836	0	0	0	0	0	0	0	0	0	0	0	0	0	0	0	0	0	0
GM7094	0.4033	0.1467	0	0.1099	0.2594	0	0	0	0	0	0	0	0	0	0	0	0	0
GM4956	0	0	0	0	0	0	0	0	0	0	0	0	0	0	0	0.0708	0	0
GM21909	0	0	0	0	0	0	0	0	0	0	0	0	0	0	0	0	0	0
KHDC1A	0	0	0	0	0	0	0	0	0	0	0	0	0	0	0	0	0	0
GM16329	0	0	0	0	0	0	0	0	0	0	0	0	0	0	0	0	0	0
GM16327	0	0	0	0	0	0	0	0	0	0	0	0	0	0	0	0	0	0
KHDC1C	0	0.0276	0.0248	0	0	0	0	0	0	0.0355	0	0.0326	0	0	0	0	0	0
GM2709	0	0	0	0	0	0	0	0	0	0	0	0	0	0	0	0	0	0
GM16533	0	0	0	0	0	0	0	0	0	0	0	0	0	0	0	0	0	0
KHDC1B	0	0	0	0	0	0	0.0599	0	0	0	0	0	0	0	0	0	0	0
GM16328	0	0	0	0	0	0	0	0	0	0	0	0	0	0	0	0	0	0
KCNQ5	0.0512	0.0419	0	0	0	0	0.7398	0.5651	0.4715	1.625	1.6583	1.9467	0	0	0	0.0063	0	0
GM36949	0	0	0	0	0	0	0	0	0	0	0	0	0	0	0	0	0	0
GM7658	0.7879	1.2898	1.0716	0.7517	1.4359	1.1448	1.3693	0.7959	1.0186	1.3512	1.3177	1.0157	1.3577	1.2266	1.2541	1.2464	1.2475	1.3763
GM38243	0	0	0	0	0	0	0	0	0	0	0.1233	0	0	0	0	0	0	0
GM26580	0	0	0	0	0	0	0.0639	0.0305	0.0911	0.1648	0.1844	0	0	0	0	0	0	0
GM5696	0.1783	0	0	0	0.086	0	0	0	0	0.2501	0	0	0.0813	0	0.0851	0.0875	0	0
GM28239	0	0	0	0	0	0	0	0	0	0	0	0	0	0	0	0	0	0
RIMS1	0.0347	0.0531	0.068	0	0	0	0	0	0	0	0	0	0	0	0	0.0205	0.0073	0.0397
GM26866	0	0	0	0	0	0	0	0	0	0	0	0	0	0	0	0	0	0
GM7761	0	0	0	0	0	0	0	0	0	0	0	0	0	0	0	0	0	0
GM29506	0	0.0517	0.0232	0	0	0	0	0	0	0.0997	0	0	0	0.0207	0.0452	0	0	0
4933415F23RIK	0.0552	0	0	0	0	0	0	0	0.0357	0	0.0362	0	0	0	0	0	0.0292	0
GM24176	0	0	0	0	0	0	0	0	0	0	0	0	0	0	0	0	0	0
GM6420	0.1361	0.2971	0.2665	0	0	0.0712	0	0.4419	0.088	0	0	0.2632	0	0.3575	0.13	0.1336	0.1437	0
MIR30A	0.6929	0	0	0	0	0	0	0	0	0	0	0	0	0	0	0	0	0
GM27028	0.2466	0.2692	0.483	0.1008	0.119	0.516	0	0.6406	0.3188	0.519	0.3228	0	0	0	0	0.1211	0.2603	0.1175
MIR30C-2	0	0	0	0	0	0	0	0	0	0	0	0	0	0	0	0	0	0
GM29107	0	0	0.2777	0.116	0	0	0.1929	0	0	0	0	0.1828	0	0	0	0	0	0
GM20954	0	0	0	0	0	0	0	0	0	0	0	0	0	0	0	0.075	0	0
OGFRL1	5.3572	5.4364	5.0917	3.1211	2.9679	3.3007	3.2927	2.75	2.7846	3.6777	4.4155	3.551	2.7287	2.274	2.3003	2.2937	2.3825	2.2256
GM7784	0	0	0	0	0	0	0	0	0	0	0	0	0	0	0	0	0	0
GM28822	0	0	0	0	0	0	0	0	0	0	0	0	0	0	0	0	0	0
B3GAT2	0.349	0.5973	0.3883	0.1946	0.0765	0.166	0.0647	0.103	0.082	0.1558	0.0519	0.0818	0.1158	0.0764	0.1439	0.0779	0.1256	0.0907
SMAP1	9.2753	8.5612	7.9781	6.753	7.2498	7.2277	8.9288	7.3458	8.0242	6.6619	9.475	9.2433	7.1185	6.6886	7.8856	6.7162	6.9874	6.1889
SDHAF4	46.7769	44.48	54.2972	57.5924	54.4212	50.8245	17.151	16.0836	16.0836	24.0904	21.6624	19.0859	19.309	18.9788	17.149	21.2257	21.0349	23.1698
GM26524	0.2523	0	0	0.2063	0	0.132	0	0.4915	0.8155	0.177	0.4954	0.3253	0.1151	0.4419	0	0.1239	0	0.2404
FAM135A	12.3104	11.9508	12.4769	8.9966	9.8322	10.125	9.1774	7.7188	7.8312	8.7923	9.3701	7.9313	1.4205	1.1695	1.4447	2.8403	3.187	3.2987
GM37580	0.123	0.0767	0.086	0.1293	0.1017	0.0919	0.1434	0.1369	0.0682	0.0247	0.184	0.1133	0.0801	0.1693	0.0671	0.069	0.0371	0.067
GM26607	0	0	0	0	0	0	0	0	0	0	0	0	0	0	0	0	0	0
COL9A1	2.4851	2.7229	2.4051	8.1696	8.8326	8.5212	0.0396	0.0252	0.0126	0.0272	0.0127	0.0501	0.1417	0.221	0.2225	6.8252	6.0459	5.2999
COL19A1	0	0	0	0	0.0069	0	0	0	0	0	0	0	0	0	0.0068	0	0	0
GM26418	0	0	0	0	0	0	0	0	0	0	0	0	0	0	0	0	0	0
TUBB4B-PS2	1.1775	0.7631	0.8648	1.2038	1.2782	1.2319	1.0511	0.908	0.6185	1.0843	0.9633	0.9013	0.7385	0.58	0.492	0.4336	0.3496	0.2104
GM28439	0.0562	0	0.055	0.0459	0.0542	0	0	0	0	0	0	0	0.1025	0.0492	0	0	0.1186	0.0535
GM10222	0	0.1826	0.1639	0.4106	0.3229	0.5252	0	0.2173	0	0	0.219	0	0.7633	0.2931	0.6393	0.3286	0.5299	0
GM28438	5.1336	5.7586	5.8652	6.5311	7.1548	6.117	0.194	0.3704	0.7375	1.8009	1.4933	0.9192	16.6523	14.2365	18.5217	9.5221	12.6447	13.0437
GM28437	0.754	1.2344	1.3537	1.0791	1.6369	1.3805	0.5128	0.408	0.4874	0.9698	1.0692	1.2151	1.8916	2.201	2.5803	2.2829	2.4541	2.9934
GM10925	0.2177	0.1584	0.0711	0.178	0.07	0.3037	0.1974	0.2827	0.5629	0.6109	1.0448	0.5613	0.5958	0.3177	0.7623	0.2138	0.5362	0.9679
GM28661	0.5057	0.6308	0.3537	0.6499	0.8365	0.7558	0.3931	0.563	0.3736	2.0274	1.8913	1.1176	1.6477	0.8857	1.3799	1.2769	1.2202	1.239
GM29216	0.8	3.4924	1.273	0.8996	1.8332	1.7785	5.1686	7.5324	5.1713	2.9465	3.7958	3.7385	1.5508	1.4887	1.8145	5.106	4.8556	3.9063
LMBRD1	11.1767	11.8292	12.9095	13.9815	14.8222	16.0117	5.0077	4.5349	4.2049	2.8146	3.6413	3.3096	4.5937	4.0843	4.7379	3.7854	3.8514	3.7988
GM28594	0	0	0	0	0	0	0	0	0	0	0	0	0	0	0	0	0	0
GM28237	0	0	0	0	0	0	0	0	0	0	0	0	0	0	0	0	0	0
GM9443	0	0	0	0	0	0	0	0	0	0	0	0	0	0	0	0	0	0
GM29414	0	0	0	0	0	0	0	0	0	0	0	0	0	0	0	0	0	0
ADGRB3	0.5514	0.6105	0.5815	0.0976	0.1125	0.0915	0	0	0	0	0	0	0	0	0	0	0.0028	0
GM15702	0	0.3628	0.1085	0	0	0	0.1507	0	0	0.1555	0	0	0	0	0	0.2176	0.117	0
GM20172	0	0	0	0	0	0	0	0	0	0	0	0	0	0	0	0	0	0
GM22260	0	0	0	0	0	0	0	0	0	0	0	0	0	0	0	0	0	0
GM37543	0	0	0	0	0	0	0	0	0	0	0	0	0	0	0	0	0	0
GM37331	0.0146	0.0955	0.0143	0.0238	0	0.0153	0	0	0	0	0	0	0	0	0	0	0	0
GM37211	0	0.0626	0	0	0.0277	0.015	0	0	0	0	0	0	0	0	0	0	0	0
GM37862	0.0194	0.0212	0.038	0	0	0	0	0	0	0	0	0	0	0	0	0	0	0
GM38286	0.0475	0.0173	0.0155	0	0	0	0	0	0	0	0	0	0	0	0	0	0	0
GM37880	0.0302	0	0	0	0	0	0	0	0	0	0	0	0	0.0132	0	0	0	0
GM25294	0	0	0	0	0	0	0	0	0	0	0	0	0	0	0	0	0	0
GM37011	0	0.0549	0	0.0137	0	0	0	0	0	0	0	0	0	0	0	0	0	0
GM29214	0.0863	0.0942	0	0	0	0	0	0	0	0	0	0	0	0	0	0	0	0
GM37051	0.0334	0.1095	0.0164	0	0	0	0	0	0	0	0	0	0	0	0	0	0.0176	0
GM38260	0	0.0269	0.0724	0	0	0	0	0	0	0	0	0	0	0	0	0	0	0
GM37628	0.0181	0.079	0.062	0.0296	0	0.0189	0	0	0	0	0	0	0	0	0	0	0	0.0086
8030445P17RIK	0.0359	0.0784	0	0	0	0	0	0	0	0	0	0	0	0	0	0	0	0
GM38198	0.0412	0.03	0.0135	0	0	0	0	0	0	0	0	0	0	0	0	0	0	0
GM37077	0	0.0291	0.0131	0.0218	0	0.0139	0	0	0	0	0	0	0	0	0	0	0	0
GM37895	0.0216	0.0944	0.0635	0	0.0104	0	0	0	0	0	0	0	0	0	0	0	0	0
GM36952	0.0543	0.0741	0.0133	0.0999	0	0	0	0	0	0	0	0	0	0	0	0	0	0
GM37602	0.0743	0.0649	0.0582	0	0.0143	0	0	0	0	0	0	0	0	0	0	0	0.0157	0
2900022M07RIK	0.0484	0.1056	0.0947	0	0	0	0	0.0628	0	0	0	0	0	0	0	0	0	0
2900002M20RIK	0.2982	0.1627	0.876	0	0.4315	0.156	0	0	0	0	0	0	0	0	0	0	0	0
GM9884	0	0	0	0	0	0	0	0	0	0	0	0	0	0	0	0	0	0
GM18443	0	0	0	0	0	0	0	0	0	0	0	0	0	0	0	0	0	0
GM19123	0	0	0	0	0	0	0	0	0	0	0	0	0	0	0	0	0	0
GM24064	0	0	0	0	0	0	0	0	0	0	0	0	0	0	0	0	0	0
4931408C20RIK	0	0.0249	0.0223	0	0	0	0	0	0	0	0	0	0	0	0	0	0	0
GM19641	0	0	0	0	0	0	0	0	0	0	0	0	0	0	0	0	0	0
GM5524	0	0	0	0	0	0	0	0	0	0	0	0	0	0	0	0	0	0
GM18776	0	0	0	0	0	0	0	0	0	0	0	0	0	0	0	0	0	0
GM19028	0.0263	0.086	0.0772	0.043	0.0253	0.1374	0.3216	0.1365	0.2377	0.0369	0.0688	0.237	0	0	0	0	0.0555	0.0501
GM38089	0	0	0	0	0	0	0	0	0	0	0	0	0	0	0	0	0	0
GM7846	12.03	16.0695	19.8692	26.2858	23.7346	24.7969	15.3866	10.2606	12.5356	17.6361	21.8576	14.3519	15.234	14.6235	14.7471	7.5816	8.1502	8.554
GM597	0	0	0	0.0139	0	0	0	0	0	0.0239	0	0	0	0	0	0	0	0
GM5697	0.0396	0	0	0.0324	0.0191	0.0415	0.1348	0.0515	0.0513	0.0556	0.0259	0	0	0.0347	0	0.0195	0.0628	0
GM6462	0	0	0.1585	0	0	0	0	0	0	0	0	0	0	0	0	0	0	0
GM18033	0	0	0	0	0	0.0936	0	0	0	0	0	0	0	0	0	0	0	0
GM25586	0	0	0	0	0	0	0	0	0	0	0	0	0	0	0	0	0	0
GM22679	0	0	0	0	0	0	0	0	0	0	0	0	0	0	0	0	0	0
GM23785	0	0	0	0	0	0	0	0	0	0	0	0	0	0	0	0	0	0
MIR6342	0	0	0	0	0	0	0	0	0	0	0	0	0	0	0	0	0	0
GM5525	4.7997	4.5838	5.3613	3.5268	3.9799	3.884	4.1315	6.5259	6.5449	7.6294	5.5465	6.2362	4.892	3.5137	4.0825	5.2655	4.8292	4.4304
GM7858	0	0	0	0	0	0	0	0	0	0	0	0	0	0	0	0	0	0
GM23771	0	0	0	0	0	0	0	0	0	0	0	0	0	0	0	0	0	0
GM27430	0	0	0	0	0	0	0	0	0	0	0	0	0	0	0	0	0	0
GM9898	0	0	0	0	0	0	0	0	0	0	0	0	0	0	0	0	0	0
GM6473	0	0	0	0	0.0392	0	0	0.1584	0	0	0	0	0.0742	0.1068	0	0.1198	0	0.1162
GM2914	0	0	0	0	0	0	0	0	0	0	0	0	0	0	0	0.1473	0	0
PHF3	11.9613	12.8241	12.0022	9.2609	9.9889	11.3246	15.9022	14.9676	16.9349	14.9887	20.7897	18.3573	12.3579	9.7585	10.7016	9.9345	10.0573	10.1317
GM37522	0.0512	0.1489	0.0668	0.1814	0.1811	0.0892	0.2552	0.2216	0.1323	0.0479	0.067	0.1759	0.1245	0.1345	0.1629	0.1173	0.1621	0.2113
GM37906	0.0162	0.1592	0.0635	0.1326	0.0626	0.1696	0.1102	0.1053	0.1257	0.2047	0.2546	0.2299	0.1479	0.0852	0.2477	0.1751	0.2225	0.2471
PTP4A1	10.1161	11.5068	9.8898	9.607	9.6536	10.3427	19.0435	19.1809	17.7587	16.5065	19.3987	18.8858	11.6043	9.3749	10.1911	9.414	10.2191	10.0292
GM5698	0.068	0.2225	0.3993	0.0556	0	0.1422	0.1849	0.0883	0.0879	0	0	0	0	0.0595	0	0.2002	0.1435	0.1942
GM9458	0	0	0	0	0	0	0	0	0	0	0	0	0	0	0	0	0	0
GM5699	0	0.5941	0.1999	0	0	0.0712	0	0	0	0	0.0891	0	0.0621	0	0.065	0.0668	0.1437	0.4538
GM29669	0	0	0	0	0	0	0	0	0	0	0	0	0	0.0489	0.0533	0	0	0
GM28644	0	0	0	0.0688	0	0	0	0	0	0	0	0	0	0	0	0.0826	0	0
4931428L18RIK	0	0	0	0	0	0	0.1766	0.1264	0.042	0	0	0	0	0	0	0	0	0
GM29128	0	0	0	0	0	0	0	0	0	0	0	0	0	0	0	0	0	0
GM7893	0	0	0	0	0	0.2288	0.5948	0	0	0	0.5724	0.2819	0.5984	1.3404	0	0	0	0
LGSN	0.0508	0	0	0	0	0	2.8329	2.2431	2.233	1.3186	2.2275	3.1435	0	0	0	0	0	0
PIH1D3	0	0	0	0	0	0	0	0	0.0877	0	0	0	0	0	0	0	0	0
GM26145	0	0	0	0	0	0	0	0	0	0	0	0	0	0	0	0	0	0
GM4850	0	0.0961	0.0862	0	0	0	0	0	0	0	0	0.1135	0	0	0	0	0	0
GM28645	0	0.0952	0	0	0	0	0	0	0	0	0	0	0	0	0	0	0	0
GM6489	0.0707	0.1543	0.2077	0	0.0682	0	0.1923	0.0918	0	0	0	0	0	0	0	0	0.0746	0
GM10307	0	0	0	0	0	0	0	0	0	0	0	0	0	0	0	0	0	0
GM19680	0.6828	0.8163	0.9871	0.7446	0.6902	0.6464	0.1769	0	0.1261	0.0456	0.0426	0.0419	0	0	0	0.0639	0.0686	0.031
GM23032	0	0	0	0	0	0	0	0	0	0	0	0	0	0	0	0	0	0
GM7910	0	0	0	0	0	0	0	0	0	0	0	0	0	0	0	0	0	0
KHDRBS2	0.0048	0	0.0187	0.0078	0	0	0.0455	0.0559	0.0556	0.0067	0.0063	0.0062	0	0.0042	0.0046	0	0	0
GM25814	0	0	0	0	0	0	0	0	0	0	0	0	0	0	0	0	0	0
GM37999	0	0	0	0	0	0	0	0	0	0	0	0	0	0	0	0	0	0
GM37110	0	0	0	0	0	0	0	0	0	0	0	0	0	0	0	0	0	0
GM37911	0	0	0	0	0	0	0	0	0	0	0	0	0	0	0	0	0	0
GM9839	0	0	0	0	0	0	0	0	0	0	0	0	0	0	0	0	0	0.0326
GM37792	0	0	0	0	0	0	0	0	0	0	0	0	0	0	0	0	0	0
GM5415	0	0	0	0	0	0	0	0	0	0	0	0	0	0	0	0	0	0
GM24732	0	0	0	0	0	0	0	0	0	0	0	0	0	0	0	0	0	0
GM37426	0	0	0	0	0	0	0	0	0	0	0	0	0	0	0	0	0	0
GM23024	0	0	0	0	0	0	0	0	0	0	0	0	0	0	0	0	0	0
GM37151	0	0	0	0	0	0	0	0	0	0	0	0	0	0	0	0	0	0
GM28624	0	0	0	0	0	0	0	0	0	0	0	0	0	0	0	0.0227	0	0
GM37724	0	0	0	0	0	0	0	0	0	0	0	0	0	0	0	0	0	0
GM7114	0	0.1201	0.1347	0.045	0.0265	0.1439	0.0374	0.1429	0.0711	0.2701	0.288	0.1773	0.0251	0.0722	0.1051	0.081	0.029	0
GM4785	0	0	0	0	0.0632	0	0	0	0	0	0	0.0845	0	0	0	0	0	0
GM24901	0	0	0	0	0	0	0	0	0	0	0	0	0	0	0	0	0	0
GM37591	0	0	0	0	0	0	0	0	0	0	0	0.0976	0	0	0	0	0	0.0721
GM2987	0	0	0	0	0	0	0	0	0	0	0	0	0	0	0	0	0	0
GM25792	0	0	0	0	0	0	0	0	0	0	0	0	0	0	0	0	0	0
GM18799	0	0	0	0	0	0	0	0	0	0	0	0	0	0	0	0	0	0
GM7933	0	0	0	0	0	0	0	0.0283	0	0.0306	0.0571	0.0281	0	0	0	0	0	0
GM23453	0	0	0	0	0	0	0	0	0	0	0	0	0	0	0	0	0	0
PRIM2	21.1023	23.4387	21.0953	22.6186	22.6474	23.7858	9.444	9.48	9.18	16.3572	17.6991	14.2703	13.3712	11.8921	12.9846	7.7453	8.0463	6.3706
GM29228	0.2354	0.6423	0.3458	0.385	0.9085	0.4926	0.9606	0.6114	0.3043	0.6606	0.3081	0.9104	0.4295	0.5154	0.3372	0.4623	0.8697	0.3364
GM37618	0.032	0.0175	0	0.0262	0.0463	0.0335	0	0.0208	0.0621	0.0673	0.0419	0.0206	0.1022	0.042	0.0306	0.0314	0	0
GM17813	0	0	0	0.368	0	0	0	0	0	0	0	0	0.1368	0	0.1432	0	0.1583	0
1700001G17RIK	0.6641	0.6644	0.4336	0.3168	0.7475	0.7527	0.5269	0.5031	0.5724	0.7765	0.5795	0.6421	1.1612	0.9208	1.427	0.6521	0.5842	0.7382
GM38173	0	0	0	0	0	0	0.0578	0.1105	0.0275	0.0597	0.0835	0.0822	0	0.0186	0.0406	0.0209	0.0673	0
RAB23	1.4311	1.3869	1.4131	1.5152	1.4267	1.783	1.6074	1.6427	1.8502	1.4415	3.4589	3.1158	2.4487	2.1841	2.121	3.1546	3.1718	2.9704
BAG2	19.605	20.5022	19.6399	23.5315	22.9509	22.3793	15.8384	14.9139	15.6574	17.0833	18.4625	17.1679	32.881	27.9153	30.5196	37.1133	39.5232	37.4517
GM37905	0	0.3149	0.2826	0.118	0.2784	0.3019	0	0	0	0	0	0	0.3949	0.1263	0.6889	0.1417	0.4569	0.6873
ZFP451	5.0878	5.6818	5.2288	4.5929	4.8042	5.401	5.9403	5.3653	5.9354	8.2069	8.595	7.5403	3.8198	3.2206	3.4084	3.6571	4.0428	3.874
GM15455	0.0962	0.189	0.0754	0.1259	0.0743	0.0805	0.1047	0.1	0.0746	0.216	0.1511	0.0992	0.1931	0.1516	0.1654	0.1323	0.1219	0.055
BEND6	1.1217	1.0045	0.9154	2.8698	2.9972	3.2499	8.0397	8.7411	8.7015	8.4954	10.0145	10.5308	4.4345	3.9042	3.5709	8.1906	9.154	9.1943
GM37067	0	0	0	0	0	0	0.0411	0	0.0391	0.0424	0	0	0	0	0	0.0297	0	0.0288
DST	9.1712	9.2661	8.5048	7.2563	8.9148	11.5814	5.3529	4.6375	6.2131	7.352	12.4899	10.7141	5.382	3.4348	4.1283	4.1015	3.3604	4.0036
GM37354	0.0206	0.045	0	0	0.0199	0.0216	0.0281	0	0.0267	0	0.054	0	0.0188	0.0181	0.0394	0	0.0436	0.0197
GM28631	0	0	0	0.1205	0.1421	0.1541	0	0	0	0	0	0	0	0	0	0	0	0
GM23792	0	0	0	0	0	0	0	0	0	0	0	0	0	0	0	0	0	0
GM38157	0.2028	0.253	0.1135	0.2844	0.2796	0.0909	0.0788	0.1129	0.1498	0.0407	0.1138	0.2988	0.0793	0.2791	0	0.0854	0.2141	0.1104
MIR6896	0	0.7356	0.66	2.2047	0	2.1153	0	0.8753	0	0.9457	2.6465	1.7377	0	3.5412	1.2873	2.6472	0.7114	0
GM26788	0.2469	0.3032	0.3325	0.4796	0.5857	0.5059	0.3638	0.2806	0.3857	0.3465	0.3636	0.5173	0.1877	0.1442	0.1867	0.2728	0.2606	0.2353
A930005N03RIK	0.434	0.3875	0.425	0.6453	0.571	0.6192	0.3756	0.4612	0.7141	0.2768	0.5164	0.6612	0.252	0.2419	0.2637	0.5036	0.2915	0.3759
GM37958	0	0	0	0	0	0	0	0	0	0	0	0	0	0	0.2185	0	0	0
GM37385	0.1271	0	0	0.104	0.2453	0	0	0	0	0	0.832	0	0	0	0	0	0	0
GM5266	0	0	0	0	0	0	0	0	0	0.0594	0	0	0.1159	0.1112	0	0	0	0
GM3052	0	0	0	0	0	0	0.0684	0.1088	0.1299	0.3996	0.3508	0.4535	0	0	0	0	0	0
GM37233	0	0	0	0	0	0	0.4808	0.4897	0.4367	0.6172	1.0591	1.0532	0	0.0206	0	0	0	0
MIR5103	0	0	0	0	0	0	0	0	0	0	0	0	0	0	0	0	0	0
CCDC115	17.044	15.8996	16.8994	16.8192	15.6613	17.0832	6.763	7.0102	6.028	11.51	17.0174	15.1893	12.849	10.9447	12.1204	10.9235	11.1913	10.9863
GM28306	0.186	0.5075	0.5464	0.1521	0.0897	0.6811	0	0	0.1202	0.261	0.4869	0.1199	0.4242	0.1629	0.6217	0.274	0.0982	0
IMP4	15.381	16.3981	14.9948	12.5089	12.3654	14.0582	5.602	6.3575	6.0164	15.537	17.2797	16.5888	9.9128	9.2788	9.3827	5.1005	4.894	4.686
PTPN18	2.3644	2.4234	2.5529	0.7747	0.5484	0.5629	0.3092	0.4035	0.3723	0.319	0.3174	0.3419	0.0415	0	0	0	0	0.0433
GM28417	0.1225	0.1783	0.34	0.0334	0.1379	0.0641	0.25	0.1061	0.2904	0.2866	0.1337	0.4213	0.0186	0.0358	0	0.0802	0.0647	0.0584
4930568A12RIK	0	0	0	0	0	0	0.0516	0.0985	0	0	0.0496	0	0	0	0	0.0372	0	0
PRSS39	0	0	0	0	0	0	0	0.1917	0	0	0.0483	0	0	0	0	0	0	0
GM28416	0	0	0	0	0	0	0	0	0	0	0	0	0	0	0	0	0	0
CFC1	0	0	0	0	0	0	0	0	0	0	0	0	0	0	0	0	0	0
GM28419	0	0	0	0	0	0	0	0	0	0	0	0	0	0	0	0	0	0
PRSS40	0.0234	0	0	0	0	0	0	0.0607	0	0	0	0	0	0	0	0	0	0
1700101I19RIK	0	0	0	0	0	0	0	0	0	0	0	0	0	0	0	0	0	0
AMER3	0	0	0	0	0	0	0	0	0	0.0157	0.044	0	0	0	0	0	0	0
GM28418	0	0	0	0	0	0	0	0	0	0	0	0	0	0	0	0	0	0
GM36984	0	0	0	0	0	0	0	0	0	0	0	0	0	0	0	0	0	0
GM29730	0	0	0	0	0	0	0	0	0	0	0	0	0	0	0	0	0	0
AA619741	0	0	0	0	0	0	0	0	0	0	0	0	0	0	0	0	0	0
ARHGEF4	0.4785	0.4493	0.3225	0.3283	0.3972	0.393	0.035	0.0401	0.0399	0.0505	0.0943	0.0531	0.3896	0.4641	0.4128	1.3693	1.2819	1.3483
GM37224	0	0	0	0	0	0	0	0	0	0	0	0	0	0	0	0	0	0
GM37845	0	0	0.1357	0	0	0	0	0	0	0	0	0	0	0	0	0	0	0
GM38336	0.0772	0.1053	0.1134	0.1579	0.149	0.0606	0	0.1003	0.3244	0.0271	0.2021	0.2239	0.1233	0.2028	0.1475	0.0948	0.1426	0.3494
FAM168B	59.0953	63.202	56.8928	48.5859	53.8542	59.8752	39.5054	37.9775	41.9374	68.1729	84.9547	76.1258	42.3547	37.2065	36.9471	35.3234	32.9573	32.4602
GM37127	0.0972	0.1945	0.2222	0.1458	0.1876	0.2374	0.0661	0.021	0.0629	0.1137	0.3606	0.3552	0.0591	0.1135	0.1548	0.0796	0.1882	0.0926
PLEKHB2	7.7366	8.37	7.8719	7.0528	6.9656	7.5981	15.0981	14.856	15.7126	9.9223	12.3039	11.8403	8.5361	7.8541	8.1122	13.676	12.9395	13.0351
GM19430	0	0	0	0	0	0	0	0	0	0	0	0	0	0	0	0	0	0
GM37670	1.289	0.9379	1.2623	1.5813	0.4146	0	0.5844	0.279	0.5555	0.6029	0.8436	2.2158	0.196	0.1881	0.6155	0.4219	0.6804	0.6141
GM8009	0.1128	0	0	0	0	0	0	0.1465	0.1459	0	0	0	0	0	0	0	0.1191	0
GM38027	0	0	0	0	0	0	0	0	0	0	0	0	0	0	0	0	0	0
GM25096	0	0	0	0	0	0	0	0	0	0	0	0	0	0	0	0	0	0
GM37068	0	0	0	0	0	0	0	0	0	0	0	0	0	0	0	0	0	0
GM25634	0	0	0	0	0	0	0	0	0	0	0	0	0	0	0	0	0	0
GM28415	0	0	0	0	0	0	0	0	0	0	0	0	0	0	0	0	0	0
1110002O04RIK	0	0	0	0	0	0	0	0	0	0	0	0	0	0	0	0	0.0918	0
GM8022	0	0	0	0	0	0	0	0	0	0	0	0	0	0	0	0	0	0
GM37146	0	0	0	0	0	0	0	0	0	0	0	0	0	0	0	0	0	0
GM33222	0	0	0	0	0	0	0	0	0	0	0	0	0	0.0566	0	0	0	0
4930535G08RIK	0	0	0	0	0	0	0	0	0	0	0	0	0	0	0	0	0	0
GM38049	0	0	0	0	0	0	0	0	0	0	0.0469	0	0.9814	0.8165	1.1986	0.3169	0.0379	0.205
HS6ST1	9.6229	10.5705	9.3192	5.9897	6.5011	6.5107	23.8722	21.6406	24.8826	18.8588	27.0745	26.8033	13.7354	12.0266	11.6657	8.4208	6.7189	6.7582
GM37335	0	0	0	0	0	0	0	0	0	0	0	0	0	0	0	0	0	0
GM33280	0.0227	0.0124	0.0555	0.0834	0.0328	0.083	0.1079	0.1325	0.2052	0.0636	0.1187	0.1608	0.0207	0.0397	0.0108	0.0111	0.0479	0.0108
UGGT1	31.4675	32.7905	30.9169	28.9635	31.2263	35.3094	21.404	20.5165	21.7549	23.8148	30.9789	30.9062	20.6659	17.4509	18.1938	19.3047	17.326	17.9838
MIR6897	2.3805	0.8661	0.7771	3.8938	3.8282	5.8114	6.4761	1.0306	2.0518	2.2269	1.0387	4.092	3.6196	2.7796	1.5156	3.1168	0	0
NEURL3	0.1223	0.0334	0.1048	0.0876	0.059	0.016	0	0.0794	0.0791	0.0644	0.04	0.0394	0.1535	0.1741	0.1607	0.5106	0.3067	0.306
ARID5A	4.8334	4.4746	4.6142	5.0665	5.1406	5.4674	2.6842	2.7158	2.8709	2.6699	3.0556	3.0651	0.8912	0.8555	0.858	0.8129	0.704	0.7177
4930403P22RIK	0	0.2259	0	0	0.1332	0.0722	0.1877	0.1792	0	0	0	0.089	0	0	0	0.0678	0	0
KANSL3	17.2432	16.4702	16.4144	11.3452	11.2583	11.4671	13.1615	12.5858	14.7932	11.2836	15.7126	14.7605	7.6026	7.1509	7.3941	10.1178	9.5825	8.9552
MIR6898	0	0	0	0	0	0	0.8691	0.8298	0	0	0	0	0	0	0	0	0	0
FER1L5	0.5341	0.5491	0.5837	0.5001	0.4406	0.5345	0.3474	0.2815	0.2802	0.2064	0.2229	0.2395	0.3248	0.3593	0.2587	0.3724	0.237	0.3983
LMAN2L	1.5777	1.7001	1.8855	1.5145	1.9674	2.1123	1.073	1.094	1.4694	0.3846	0.5601	0.6637	1.1466	0.9485	1.0662	0.8928	1.0021	0.9619
CNNM4	11.0437	12.2091	11.244	8.6155	8.965	9.9129	12.4997	13.0597	15.0159	10.6501	12.7089	13.5416	7.7237	7.209	6.8595	4.1918	3.8394	3.3101
GM37909	0.0228	0.0746	0.0446	0.0373	0.022	0.0238	0.093	0.0888	0.0884	0.0639	0.0298	0.0588	0.0416	0.0399	0.0653	0	0.0962	0.0651
GM47280	0	0	0	0	0	0	0	0	0	0	0	0	0	0	0	0	0	0
CNNM3	7.2187	7.3518	6.769	4.3182	4.636	4.6421	3.5127	3.6725	3.4677	3.9463	5.9382	6.3722	2.8174	2.8991	2.6566	1.5878	1.3995	1.234
GM38033	0	0	0	0	0	0	0	0	0	0	0	0	0	0	0	0	0	0
ANKRD23	0.3466	0.3185	0.2144	0.3133	0.2464	0.2481	0.2233	0.1421	0.0943	0.256	0.4298	0.2587	0.1664	0.2077	0.2091	0.1791	0.0963	0.226
GM42417	0.0211	0.0231	0.0414	0.0173	0.0204	0.0442	0	0	0	0	0	0.0273	0	0.0185	0	0	0	0.0201
ANKRD39	6.0466	6.1841	5.9524	4.098	3.9371	3.7493	1.7974	2.1829	2.0364	2.2991	2.2693	2.2078	1.6202	1.5923	1.4639	1.8996	1.5846	1.5713
SEMA4C	28.353	27.368	27.8077	20.3241	20.8563	20.9229	9.9804	10.0441	11.5082	11.543	15.0864	14.5688	3.8893	3.058	3.0791	3.3974	2.5328	3.1945
D430040D24RIK	3.8245	3.5101	3.2005	2.7583	2.6167	2.4736	1.2296	1.1741	1.416	0.9757	0.933	0.8965	0.3172	0.4111	0.4151	0.3073	0.2936	0.381
FAM178B	4.3491	3.7705	4.3496	2.3839	2.2023	2.7108	0	0	0.0997	0	0	0.0398	0.0281	0	0.0147	0.0303	0	0.0294
GM6428	0	0	0	0.1166	0.2752	0	0	0	0	0	0	0	0	0	0.1362	0	0	0
GM24133	0	0	0	0	0	0	0	0	0	0	0	0	0	0	0	0	0	0
COX5B	506.904	523.635	505.78	403.712	411.012	402.791	148.628	151.176	151.066	218.529	212.903	198.942	188.671	190.853	195.297	133.912	127.391	115.68
ACTR1B	120.461	124.15	114.077	91.271	92.2062	99.3559	60.4999	57.2132	63.3836	83.4239	90.6451	87.0809	42.4888	40.7657	41.4225	44.9986	42.9296	42.1928
4933424G06RIK	0.0846	0.0616	0.0553	0.1154	0.1361	0.2066	0.0767	0.0366	0.0365	0.0396	0	0.0364	0.0515	0.0741	0	0.0277	0.1787	0.0538
GM33533	0.6327	0.4603	0.236	0.1971	0.0291	0.1576	0.041	0	0	0	0	0	0	0	0	0.0592	0	0
ZAP70	0.0493	0	0	0.0269	0	0	0.0224	0	0	0	0	0	0	0	0.0157	0.0161	0	0
GM18828	0	0	0	0	0	0	0	0	0	0	0	0	0	0	0	0	0	0
TMEM131	6.5698	7.2845	6.7357	4.8986	5.8145	6.7314	5.2608	5.0503	5.8654	4.1142	7.4913	6.6236	5.1497	3.7395	4.1779	3.4387	2.9958	3.3814
GM37506	0	0	0	0	0	0	0	0.4468	0.4448	0	0	0	0	0	0	0.6757	0	0
GM38115	0.0204	0.1113	0.0399	0	0.059	0.0213	0.0555	0.0794	0.0527	0.0286	0.0267	0	0.0744	0.0179	0.0195	0.1001	0.043	0
F830112A20RIK	0.0139	0.0605	0.0271	0.0453	0.0134	0.029	0.0188	0.054	0.0537	0.0777	0	0.0536	0.0253	0.0606	0.0661	0.0272	0.0731	0.066
RPL12-PS1	1.5806	1.4017	1.3544	1.0503	0.6672	1.3437	2.2844	3.4642	1.9159	2.2179	1.8104	1.5283	2.163	1.2977	1.9813	2.2312	2.6071	2.165
VWA3B	0.2466	0.2492	0.1789	0.0299	0.0617	0	0	0	0	0	0	0	0.0167	0	0	0	0.0096	0
GM37020	0.0496	0	0.0486	0	0	0	0	0	0	0	0	0	0	0	0	0	0	0
CNGA3	0.0497	0.0271	0	0.0102	0	0.026	0.1015	0	0.1286	0	0.0488	0.0321	0.0567	0.0327	0.1069	0.0488	0	0
1700074A21RIK	0	0	0	0	0	0	0	0.554	0	0	0	0	0	0.1245	0	0	0	0
INPP4A	0.4263	0.3774	0.4638	0.2944	0.393	0.3122	0.5541	0.5044	0.7103	0.1927	0.6386	0.5435	0.3975	0.365	0.4207	0.4977	0.425	0.3926
4930439A04RIK	0.0571	0.0624	0	0	0	0	0	0.0742	0	0	0	0	0	0	0	0	0.1206	0.0544
GM37135	0	0	0	0	0	0	0	0	0	0	0	0	0	0	0	0	0	0
COA5	33.5334	36.7331	34.0479	24.2266	24.6985	27.6886	10.9097	9.8047	10.3696	13.5156	17.5675	16.9258	17.8673	14.7576	15.5177	14.1137	13.9683	13.5509
UNC50	59.8532	57.0281	62.58	53.8694	55.9168	55.4493	33.608	33.7486	32.025	41.6207	50.4497	41.2932	26.1794	26.6582	29.1314	30.4732	32.6599	31.4684
MGAT4A	8.4217	9.2084	8.5989	10.2301	12.2238	13.2507	4.9978	4.3106	5.0714	3.7461	4.8245	4.6039	0.0174	0.0067	0.0328	0.0263	0.0282	0.04
4930594C11RIK	0	0	0.07	0	0.0862	0.0374	0	0	0	0	0	0.0691	0.0163	0	0	0	0.0189	0
GM43213	0	0.03	0	0	0.0265	0	0	0	0.0355	0.0386	0	0	0	0	0	0	0	0
2010300C02RIK	0.0485	0.0741	0.057	0.0238	0.0935	0.0609	0.356	0.491	0.2632	0.5305	0.4949	0.5249	0	0	0	0	0.0102	0
4930556I23RIK	0	0	0	0	0	0	0	0	0	0	0.115	0	0	0	0	0	0	0
4930470B04RIK	0	0	0	0	0	0	0.0347	0	0	0	0	0	0	0	0	0	0	0
GM19863	0	0	0	0	0	0	0	0	0	0	0	0	0	0	0	0	0	0
TSGA10	0.4614	0.6295	0.4654	0.8604	0.9439	1.0235	0.3452	0.2936	0.34	0.4209	0.4349	0.3986	0.3873	0.4041	0.3261	0.4803	0.5894	0.488
GM26805	0.0319	0	0	0	0.0154	0	0	0	0	0	0	0.0205	0.0291	0.0697	0.0761	0.0156	0.0336	0.0607
LIPT1	8.4914	9.5296	8.9733	7.5921	6.0638	7.4787	5.0247	5.2338	3.8145	9.3569	8.8229	8.164	10.5041	9.726	9.5299	15.4518	16.4081	16.5929
MITD1	31.8096	33.7875	34.5945	13.4218	14.0522	14.0666	9.1561	9.1576	8.2207	7.6758	6.37	6.022	6.4975	6.0194	7.1411	7.0111	8.0244	6.6845
MRPL30	81.8635	82.9234	84.0658	65.9798	69.026	65.5291	42.504	41.3758	40.6169	44.1886	44.6153	39.538	45.5648	42.5634	45.6306	42.9793	46.0415	45.5101
LYG2	0.0384	0	0.0188	0	0.0741	0	0	0	0	0	0.0251	0	0	0	0	0	0.0203	0
GM15457	0.0123	0.0135	0.0241	0	0	0	0	0	0	0	0	0	0	0	0	0	0	0
LYG1	0.0554	0.2419	0.1085	0.0906	0.0535	0.1159	0	0	0	0	0	0	0	0	0	0	0	0
GM23409	0	0	0	0	0	0	0	0	0	0	0	0	0	0	0	0	0	0
TXNDC9	19.9557	20.6712	21.0721	19.2827	20.3238	20.6127	12.4178	12.5447	11.5725	17.8308	17.5675	15.7067	6.948	5.6376	6.3545	8.9275	9.4658	9.5173
EIF5B	3.1023	3.5841	3.4036	2.6651	3.0176	3.4093	2.1408	2.3126	2.2761	3.7443	3.9287	3.5443	2.3516	1.4931	1.3682	1.6842	1.6986	1.7062
REV1	7.6811	8.1483	8.2797	8.1999	8.2963	9.1128	7.2366	6.9511	6.9505	8.2262	11.5578	10.8486	3.3764	3.5205	3.7935	4.4097	4.2604	4.3243
GM37062	0.1404	0.0766	0.2062	1.0332	0.2709	0.514	0.3819	0.3646	0.1815	0.4924	0.5512	0.4524	0.7043	0.1844	0.4022	0.1378	0.5186	0.2675
GM5099	0	0	0	0	0	0	0.0362	0.3112	0	0	0	0	0	0	0.0508	0	0.0281	0
AFF3	0.0222	0.0242	0.0362	0.006	0	0.0155	0.0201	0	0	0.0207	0.0097	0	0.9376	0.8871	0.9109	3.1728	2.7395	3.3674
GM16150	0	0	0	0	0	0	0	0	0	0	0	0	0.0984	0.0945	0.1546	0	0.1139	0.0514
GM16151	0	0	0.0754	0	0	0	0.1047	0	0	0	0	0	0.7024	0.5394	0.5147	0.756	0.2438	0.2201
GM16152	0	0.029	0	0	0	0	0	0	0	0.0373	0	0	0.0727	0.0233	0	0.1043	0.028	0.1518
GM34727	0	0	0	0	0	0	0	0	0	0	0	0	0	0	0	0	0	0
GM38135	0	0	0	0	0	0	0	0	0	0	0	0	0	0	0	0	0	0
2610300A13RIK	0	0	0	0	0	0	0	0	0	0	0	0	0	0	0	0	0	0
LONRF2	0.0066	0	0	0	0	0	0	0	0	0	0	0	0	0	0	0	0	0
CHST10	0.0082	0.009	0.0121	0.0135	0.004	0.0129	0	0	0.0106	0.0231	0.0054	0	0	0.018	0.0157	0.004	0	0.0118
GM37707	0	0	0	0	0	0	0	0	0	0	0	0	0	0	0	0	0	0
GM6621	0.0637	0	0.0624	0	0	0	0	0	0	0	0	0	0	0.0558	0	0	0	0
NMS	0	0.0536	0	0	0	0	0.468	0.1915	0.1271	0.069	0.0643	0	0	0	0	0	0	0
PDCL3	33.6184	35.9921	35.7884	25.9596	26.5418	27.9627	25.8383	25.7007	25.5844	28.2905	36.5567	31.5101	19.7554	20.8937	19.6783	21.2296	21.9724	20.5659
GM37309	0.2401	0.4259	0.2646	0.3928	0.2607	0.157	0.2858	0.1559	0.3493	0.4212	0.1572	0.2322	0.3012	0.0526	0.2293	0.3832	0.4753	0.4576
GM37821	0	0	0	0	0	0	0	0	0	0	0	0	0	0	0	0	0	0
GM37091	0	0	0	0	0	0	0	0	0	0	0	0	0	0	0	0	0	0
MIR6349	0	0	0	0	0	0	0	0	0	0	0	0	0	0	0	0	0	0
NPAS2	0	0.0448	0	0	0	0	0	0	0	0.0144	0	0	0.0094	0	0	0.0101	0.0542	0.0294
GM20428	0	0	0	0	0	0	0	0	0	0	0	0	0	0	0.166	0	0	0
GM3617	0.0886	0	0	0	0	0.1855	0.1206	0	0	0	0	0	0.0809	0.2329	0	0	0	0
RPL31	1134.26	1104.44	1140.54	1104.35	1130.72	1126.57	1243.36	1176.84	1236.66	1052.19	1010.1	938.148	890.722	892.767	905.41	1047.74	1035.64	1067.34
TBC1D8	2.8923	2.9518	2.7772	0.9984	1.1326	1.2674	1.1624	1.366	1.3841	1.2254	1.2169	1.477	0.6425	0.7072	0.6009	0.5164	0.6344	0.4653
GM37265	0	0	0	0.0455	0	0	0	0	0	0	0	0	0	0	0	0	0	0
GM24826	0	0	0	0	0	0	0	0	0	0	0	0	0	0	0	0	0	0
CNOT11	33.1956	36.7511	33.6068	29.4203	30.3381	33.7476	19.0571	17.3947	18.9479	25.5626	31.0791	29.3987	16.2618	14.0994	15.4429	10.8933	10.5259	9.875
GM15832	0.4028	0.3224	0.2893	0.1757	0.2332	0.3372	0.4383	0.5929	0.243	0.4145	0.2461	0.5193	0.392	0.2117	0.3591	0.3428	0.3402	0.3326
SNORD89	7.156	3.417	5.2558	9.8762	12.0831	7.4869	7.9087	6.9705	5.2042	10.0411	3.5126	7.4958	3.6723	1.5667	2.99	7.027	6.1376	8.949
RNF149	49.8388	50.252	44.3248	49.3669	52.5205	59.3619	19.6419	19.5425	18.199	21.7704	27.6833	27.8243	17.3175	17.929	19.4695	15.2353	13.1389	11.3308
GM23722	0.3784	0.413	0	0.3095	1.0954	0	0	0.4915	0.4893	0.531	1.9815	0.4879	0	0	0	0	0	0.3606
GM5100	0.0835	0.0912	0	0	0	0.0874	0	0	0	0	0.2187	0	0	0.0731	0.0798	0	0.3527	0.0796
CREG2	0.2665	0.238	0.3876	0.9182	1.169	1.2084	0	0	0	0	0.0106	0	0	0	0	0	0	0
D930019O06RIK	0.3761	0.5277	0.5656	0.8568	0.7257	0.9696	1.0231	0.8547	0.6599	0.49	0.4747	0.7272	0.0123	0.0118	0	0	0.0142	0.0512
RFX8	0.046	0.0753	0.0901	0.1317	0.1775	0.1684	0.1251	0.0597	0.0595	0.0323	0.0301	0.0297	0	0	0	0	0	0
GM3646	0.1398	0	0	0	0	0	0	0	0	0	0	0	0	0	0	0	0	0
1700066B17RIK	0	0	0	0	0	0	0	0	0	0	0	0	0	0	0	0	0.1459	0
MAP4K4	31.9611	32.2599	29.6092	39.682	41.4779	43.3746	32.4851	28.7027	35.6647	22.002	35.7048	35.6958	31.4074	28.6824	27.0708	33.6797	29.4827	29.67
4930456G14RIK	0	0	0	0	0	0	0	0	0	0	0	0	0	0	0	0	0	0
IL1R2	0	0	0	0	0	0	0.0701	0.0335	0.0333	0	0	0	0.1411	0.1581	0.197	0.2785	0.5716	0.2457
GM16894	0	0	0	0	0	0	0	0	0	0	0	0	0.1066	0	0.0558	0.0574	0	0
GM37347	0	0	0	0	0	0.0335	0	0	0	0	0	0	0	0	0	0	0	0
IL1R1	0.0387	0.0844	0.053	0.0126	0.0075	0	3.8071	3.8058	3.8186	3.0703	5.0705	4.8045	2.3701	2.2818	2.4368	3.6671	4.0809	4.3465
GM38070	0	0	0	0	0	0	0	0.0099	0	0	0.0099	0	0.0139	0	0.0145	0.0149	0.0321	0.0579
IL1RL2	0	0	0	0	0	0	0	0	0	0	0	0	0	0	0	0	0	0
GM17970	0	0	0	0	0	0	0	0	0	0	0	0	0	0	0	0	0	0
IL1RL1	0.0071	0.0312	0	0.0117	0	0	0.8154	0.8805	0.8396	3.0441	3.2601	3.1281	6.6146	4.6746	5.8544	0.897	1.1375	1.2783
IL18R1	0	0	0	0	0	0	0	0	0	0	0	0	0.0839	0.1163	0.0488	0.0201	0	0
IL18RAP	0.0219	0.0318	0.0071	0	0	0	0.3469	0.2934	0.2826	1.6052	2.0124	1.9539	2.4462	2.1823	2.3729	0.9874	1.0307	1.2149
GM35801	0	0	0	0	0	0	0	0	0	0	0	0	0	0	0	0	0	0
SLC9A4	0	0	0	0	0	0.0226	0	0	0	0	0	0	0	0	0	0.0212	0.0228	0.0719
GM37435	0	0	0	0	0	0	0.017	0	0	0.0175	0	0	0.0682	0.0437	0.0714	0.0122	0.0263	0
SLC9A2	0	0	0	0	0	0.0074	0	0.0274	0.0182	0	0	0.0272	0	0	0	0	0	0.0067
GM37623	0	0	0	0	0	0	0	0	0	0	0	0	0	0	0	0	0	0
GM37915	0	0.0165	0	0.0123	0	0.0158	0.041	0.0588	0.0195	0	0.0592	0	0	0	0.0288	0.0148	0.0159	0.1006
MFSD9	0.1632	0.1048	0.141	0.1963	0.1667	0.2611	0.9793	1.1221	1.0674	0.6331	0.2764	0.5074	0.4029	0.3867	0.3759	0.6976	0.7499	0.686
TMEM182	0	0.0593	0.0532	0	0	0	0.2464	0.1412	0.1874	0.0254	0.166	0.2569	0	0.0635	0.0173	0	0.0382	0
GM5973	0	0	0	0	0	0	0	0	0	0	0	0	0	0	0	0	0	0
4930448I06RIK	0	0	0	0	0	0	0	0	0	0	0	0	0	0	0	0	0	0
GM28634	0	0	0	0	0	0	0	0	0	0	0	0	0	0	0	0	0	0
GM29260	0	0	0	0	0	0	0	0.0799	0	0	0	0	0	0	0	0	0	0
GM5267	0	0	0	0	0	0	0	0	0	0	0	0	0.043	0	0	0	0	0
GM8176	0	0	0	0	0	0	0	0	0	0	0	0	0	0	0	0	0	0
GM9915	0	0	0	0	0	0	0	0	0	0	0	0	0	0.0312	0	0	0	0
GM29664	0	0	0	0	0	0	0	0	0	0	0	0	0	0	0	0	0	0
GM28175	0	0	0	0	0	0	0	0	0	0	0	0	0	0	0	0	0	0
GM28140	0	0	0	0	0	0	0	0	0	0	0	0	0	0	0	0.076	0	0
GM37047	0	0	0	0	0	0	0	0	0	0	0	0	0	0	0	0	0	0
PANTR1	1.3684	1.4333	1.4374	2.2474	2.5236	2.621	0	0	0.0143	0	0	0	0	0.0097	0	0	0	0
4930420N18RIK	0	0	0	0	0	0	0	0	0	0	0	0	0	0	0	0	0	0
GM20646	1.0345	0.9409	1.2945	0.8461	0.9982	1.0222	0.1173	0	0	0	0	0	0	0	0	0	0	0
POU3F3	7.4968	7.9721	7.0619	9.0368	9.9372	11.3102	0.009	0	0.0258	0	0	0.0257	0	0.0058	0.0063	0.013	0.007	0
PANTR2	0.1957	0.2563	0.0383	0.032	0.0378	0	0	0	0	0	0	0	0	0	0	0	0	0
DALIR	0	0	0	0	0	0	0	0	0	0	0	0	0	0	0	0	0.0239	0
MRPS9	14.6662	13.7803	14.5129	16.6098	15.9054	15.2818	17.4527	16.8859	17.7587	17.8002	18.2142	16.9818	15.1168	13.9353	15.4171	15.9945	16.4911	15.6091
GM23126	0	0	0	0	0	0	0	0	0	0	0	0	0	0	0	0	0	0.3498
GPR45	0	0	0	0	0	0	0	0.0088	0	0.0191	0.0178	0	0	0.006	0	0	0	0
GM24001	0	0	0	0	0	0	0	0	0	0	0	0	0	0	0	0	0	0
TGFBRAP1	2.7845	3.0733	2.8059	1.8226	2.1675	2.2002	1.8114	1.6597	2	2.0951	3.0051	2.5666	1.6526	1.288	1.229	1.5851	1.1502	1.192
GM28782	0	0	0	0.1944	0.1147	0.1243	0	0	0	0.1667	0	0	0	0	0	0	0.1254	0
8430432A02RIK	0.1577	0.4303	0.4246	0.2579	0.1521	0.0825	0.7507	0.4096	0.5097	0.885	0.3612	0.559	0.3596	0.7595	0.4141	0.3871	0.4994	0.6761
AI597479	21.3407	20.5745	22.5845	25.1565	26.4526	27.6266	22.6419	20.3994	19.976	23.1573	23.4834	21.3315	14.7707	13.2442	15.4081	17.8545	19.1034	18.0292
FHL2	0.5965	0.7076	0.5079	0.2969	0.6006	0.5427	15.0983	12.5299	14.2839	30.6408	26.6146	25.2434	49.9227	45.2419	49.2885	60.178	62.0082	63.4815
GM8210	2.2409	2.0011	1.6957	1.4162	1.769	1.7051	0.8313	0.7937	1.3169	1.858	3.1999	2.495	1.9514	1.784	1.3619	1.2003	1.0752	0.4853
GM29040	0	0	0	0	0	0	0	0	0	0	0	0	0	0.1088	0.0395	0	0.0437	0
GM29610	0	0	0	0	0	0	0	0	0	0	0	0	0	0	0	0	0	0
GM29041	0	0	0	0.1059	0	0.1355	0	0	0	0.1817	0	0.1669	0	0	0.1236	0.1271	0.1367	0
NCK2	10.8334	10.3172	10.3927	21.7033	22.8875	23.7778	35.6603	32.6435	36.2652	26.4974	30.3848	27.5202	11.7069	10.8895	10.7364	9.25	8.5798	8.4387
GM37536	0	0	0.0193	0	0	0.062	0.0269	0	0.0255	0	0	0	0	0	0	0	0	0
GM38228	0.038	0.2907	0.3726	0.4045	0.7342	0.5971	0.207	0.6918	0.5411	0.4805	0.7471	0.3434	0.2083	0.1	0.1454	0.1121	0.2008	0.3625
1500015O10RIK	0.1636	0	0	0.1338	0.3158	0.1712	0.0742	0.0708	0.0705	0.2296	0.0714	0.3516	0.1493	0.0955	0.1042	0.2678	0.403	0
GM29155	0.3223	0.1172	0.8415	0.3514	0.1036	0.3372	0	0.4185	0.2778	0.6029	0.4218	0.4155	0.588	0.4704	0.7181	0.211	0.4536	0.5117
GM29157	0.2412	0.0877	0	0.1315	0.0776	0	0.1093	0	0.1039	0.1128	0.2105	0	0.22	0.1408	0	0.2368	0.2546	0
GM29156	0	0.4304	0.4827	0.4838	0.9513	0.7221	0	0	0	0.1383	0	0	0.2698	0.1727	0.2825	0.0968	0.5204	0.4697
UXS1	15.0961	15.2437	15.3222	14.1858	14.9942	15.3094	8.7834	8.3866	7.7995	11.6747	13.4178	12.282	12.1872	10.1181	11.8362	13.0231	14.0099	14.1446
GM16103	0.2693	0.084	0.0753	0.1258	0.334	0	0.1046	0.1998	0.3979	0.1079	0.4028	0.9422	0.4562	0.3705	0.1837	0.3399	0.2842	0.0367
GM19587	1.7151	2.1675	1.4144	1.2551	1.0452	1.5111	0.6139	0.9379	1.1671	0.8867	1.2998	0.931	0.4118	1.5811	0.6035	0.4432	0.3812	1.1181
GM8241	0	0.0658	0	0	0	0	0	0	0	0	0	0	0	0	0	0	0	0
GM26352	0	0	0	0	0	0	0	0	0	0	0	0	0	0	0	0	0	0
GM24180	0	0	0	0	0	0	0	0	0	0	0	0	0	0	0	0	0.4721	0
TPP2	18.1891	19.3832	17.4873	15.8742	16.5469	18.6318	11.6269	11.3932	11.3227	11.7749	15.7256	14.173	19.4265	15.7622	16.6765	9.6209	9.9044	9.9631
METTL21C	0.0458	0.0125	0.0336	0.0842	0.1214	0.0718	0.0156	0.0297	0.0148	0.0161	0.0599	0.0885	0.0104	0.01	0.0328	0.0337	0	0.0327
GM15838	0	0	0.2677	0	0	0.286	0	0	0.7067	0.3835	0	0.3524	0	0.2394	0.7831	0.2684	0.2885	0
GM8251	0.0247	0.009	0.0161	0.0336	0.0238	0.0516	0.0335	0.0107	0	0.173	0.0968	0.2225	0.045	0.0288	0.0628	0	0.0174	0
TEX30	38.5456	42.0977	42.6501	46.2322	46.3354	46.3679	60.8042	54.2418	50.4627	72.617	74.0608	59.4084	30.8076	28.2754	28.396	18.06	22.6771	20.1036
GM29247	0	0	0	0	0	0	0	0	0	0	0	0	0	0	0	0	0	0
KDELC1	22.5764	23.4823	24.6238	35.243	34.4259	35.8327	14.4758	15.2799	15.6084	22.529	24.2372	23.4353	19.5303	16.6869	20.2246	24.193	26.1859	24.4271
BIVM	19.3702	19.2007	19.9426	17.7457	18.0238	19.1033	18.6152	15.9056	15.758	24.7835	26.6869	23.4794	12.0051	10.4894	11.2603	7.2133	8.9766	8.069
ERCC5	3.7754	3.9832	3.9272	3.7533	3.9504	3.7569	3.2866	3.2689	3.9592	1.2243	2.405	2.0875	3.8653	3.6663	3.9261	4.1028	3.9499	3.3574
METTL21E	0	0	0	0	0	0	0	0	0	0	0	0	0	0	0	0	0	0
GM15833	0	0	0	0	0	0	0	0	0	0	0	0	0	0	0	0	0	0.049
GM5700	0	0	0	0	0	0	0	0	0	0	0	0	0	0	0	0	0	0
GM28893	0	0	0	0	0	0	0.0604	0	0	0.2492	0.0581	0.1717	0	0	0	0	0	0
TXN-PS1	3.3435	2.6066	2.1828	2.0834	2.7652	0.8329	3.0319	2.2746	3.7053	2.6809	2.2925	2.2579	3.4861	2.9281	3.9534	2.3452	1.3446	1.3653
GULP1	0	0.0429	0.0641	0.0428	0.0126	0	17.5045	18.0568	14.5561	24.4866	26.8867	19.6793	38.8159	35.2997	43.7719	21.7384	26.6025	25.2716
GM37626	0	0	0	0	0	0	0.0147	0.084	0.0558	0.0756	0.127	0.1251	0.1279	0.1322	0.2368	0.127	0.1366	0.1233
GM16102	0	0	0	0	0.113	0	0	0	0	0.3287	0	0.151	0.2137	0.3077	0.5593	0.115	0	0.2232
4930521E06RIK	0	0	0	0	0	0	0.0739	0	0	0.0763	0.0712	0.1402	0.1984	0.0476	0.2077	0.1601	0	0.0518
GM38110	0	0	0	0	0	0	0	0	0	0.1335	0.0415	0.0818	0.0868	0	0.1212	0	0	0.0604
GM3489	0	0	0	0	0	0	0.1267	0	0	0	0	0	0	0	0	0	0	0
GM19480	0	0	0	0	0	0	0	0	0	0	0	0	0	0	0	0	0	0
GM3496	0	0	0	0	0	0	0	0	0	0	0	0	0	0	0	0	0	0
GM5268	0.2617	0.0571	0.0513	0.1712	0.0505	0.0548	0.0712	0	0.0677	0.1469	0	0.2024	0.0955	0.0458	0	0	0	0.0997
COL3A1	1.3482	1.4496	1.3007	1.3937	1.7264	1.5521	30.1328	27.1049	28.1682	38.4476	61.006	58.5282	341.164	360.984	350.411	119.551	103.063	114.215
GM47302	0	0	0	0	0	0	0	0	0	0	0	0	0	0	0	0	0	0
COL5A2	0.1282	0.3303	0.2662	0.1426	0.1089	0.1073	12.2312	11.2256	12.9654	16.4466	20.4655	19.1118	176.668	173.375	164.965	211.315	182.003	192.328
GM38211	0	0	0	0	0	0	0	0	0.0264	0.0096	0.0268	0.0088	0.2114	0.1433	0.2604	0.2811	0.3022	0.3767
GM8296	0	0	0	0	0	0	0	0	0	0	0	0	0	0	0	0	0	0
GM7063	0	0.0547	0	0.041	0	0	0	0	0	0	0.1969	0.0647	0.0915	0.1318	0.2395	0.0492	0.2118	0.1434
GM8304	0	0	0	0	0	0	0	0	0	0	0	0	0	0.0738	0.0805	0	0	0
GM23216	0	0	0	0	0	0	0	0	0	0	0	0	0	0	0	0	0	0
GM23974	0	0	0	0	0	0	0	0	0	0	0	0	0.3426	0	0	0	0	0
GM8307	0	0	0	0	0	0	0	0	0	0	0	0.0552	0.1951	0.3372	0.286	0.042	0	0.0815
GM23984	0	0	0	0	0	0	0	0	0	0	0	0	0	0	0	0	0	0
WDR75	64.7096	67.5577	66.9188	52.9971	55.1708	57.628	43.8117	43.1101	40.0853	75.6965	71.1661	60.2547	53.4017	44.5878	48.5097	39.6836	44.7265	44.1878
GM28906	0	0.0302	0	0	0.08	0.0289	0	0	0	0	0	0	0	0.0727	0	0	0.0292	0
GM5526	2.7913	4.9506	4.8976	2.6634	4.601	4.5023	3.955	3.6253	3.6089	8.4863	9.7434	5.398	6.3664	5.2964	6.2203	4.1115	5.7704	4.3219
GM5269	0.1971	0	0	0.0537	0.1901	0.2062	0.0893	0.1706	0.5095	0.0922	0	0.1694	0.0599	0.115	0.1255	0.0645	0.1387	0.0626
GM18303	0	0	0	0	0	0	0	0	0.1082	0	0	0	0	0	0	0	0	0
SLC40A1	0	0.006	0.0214	0.0089	0.0053	0.0057	2.7511	3.5427	2.8764	0.2531	0.3435	0.1903	3.6156	4.0499	4.3174	1.8412	2.1466	1.9688
GM9496	0.0307	0	0	0	0	0	0	0	0	0.0431	0	0	0	0	0	0	0	0
RPL23A-PS1	0.2116	0.3464	0.6217	0.3461	0.4083	0.2214	0.5757	0.9619	0.2736	0.5938	0	0.5456	0.5791	0.278	0.6063	0.4156	0.5584	0.1008
GM3852	0	0	0.1825	0	0	0	0	0	0	0	0	0.2403	0	0	0	0	0	0
STK-PS2	0	0	0	0	0.0102	0	0	0	0	0	0	0	0	0	0	0	0	0
GM18849	0	0	0.086	0.1437	0	0.0919	0	0	0	0	0	0	0.0801	0	0	0	0	0
DNAH7B	0	0	0.0048	0	0	0	0.1005	0.1119	0.1369	0.0242	0.0322	0.0444	0.2426	0.276	0.3222	0.1427	0.143	0.1478
GM8326	3.0985	3.1343	2.7629	3.0492	2.4063	3.2417	0.6168	0.8834	0.8794	1.5906	1.1211	1.1042	1.0572	1.0368	1.1307	0.7916	0.3989	0.528
DNAH7C	0.0273	0.0128	0.0191	0.0032	0.0151	0.0286	0.0425	0.0456	0.0353	0.0055	0.0102	0.0252	0.0249	0.0239	0.0261	0.0115	0.033	0.0074
SLC39A10	7.426	8.5367	7.6121	7.4135	7.4689	8.0734	25.5051	20.2957	23.533	11.6886	16.081	15.6822	17.0622	14.1517	15.1015	8.4415	9.049	9.3137
GM28151	0.9312	0.6775	0.7093	0.3385	0.0998	0.1624	0.3518	0.0672	0	0.8711	0.6772	0.4669	0.5192	0.2718	0.247	0.5588	0.7099	0.3943
GM37393	0	0	0	0	0	0	0	0	0	0	0	0	0	0	0	0	0	0
GM28527	0	0	0	0	0	0	0	0.2151	0.4283	0	0.2168	0	0	0	0.1582	0	0.1749	0
GM28825	0	0	0	0	0	0	0	0	0	0	0	0	0	0	0	0	0	0
GM28826	0	0	0	0	0	0	0	0	0	0.1415	0	0	0	0	0	0	0	0
GM4852	0.0675	0.1473	0.2644	0.1104	0.5209	0.2824	0	0.1753	0.1745	0.947	0.1767	0.261	0.3078	0.1773	0.1934	0	0.0712	0.1286
GM38090	0	0	0	0	0	0	0	0	0	0	0	0	0	0	0	0	0	0
MIR6350	0	0	0	0	0	0	0	0	0	0	0	0	0	0	0	0	0	0
GM18117	0	0	0	0	0	0	0	0	0	0	0	0	0	0	0	0	0	0
GM37196	0.1086	0	0	0	0	0	0	0	0	0	0	0	0	0	0	0	0	0
GM8337	4.9248	5.1534	4.3753	4.0486	3.4536	3.8511	2.5552	2.3409	2.8882	4.7375	4.0872	3.4037	3.0802	2.6233	2.4487	2.2435	1.3667	1.5722
GM22419	0	0	0	0	0	0	0	0	0	0	0	0	0	0	0	0	0	0
GM23829	0	0	0	0	0	0	0	0	0	0	0	0	0	0	0	0	0	0
GM19206	0	0	0	0	0	0	0	0	0	0	0	0	0	0	0	0	0	0
GM5974	0	0	0	0	0	0	0	0	0	0	0	0	0	0	0	0	0	0
GM23240	0.4066	0	0	0	0.7846	0.8508	0.5531	0.5281	0.5257	0	0	0.5242	0.3709	0.7121	0	0.7985	0	1.5496
GM28830	0	0	0	0	0	0	0	0	0	0	0	0	0	0	0	0	0	0
GM8354	0	0	0	0	0	0	0	0	0	0	0	0	0	0	0	0	0	0
GM19124	0	0	0	0	0	0	0	0	0	0	0	0	0	0	0	0	0	0
GM8357	0	0	0	0	0	0	0	0	0	0	0	0	0	0	0	0	0	0
GM22693	0	0	0	0	0	0	0	0	0	0	0	0	0	0	0	0	0	0
GM28740	0	0	0	0	0	0	0	0	0	0	0	0	0	0	0.2185	0	0	0
GM8367	0	0	0	0	0	0	0	0	0	0	0	0.0715	0	0	0	0	0	0
C230029F24RIK	0	0	0	0	0	0	0	0	0	0	0	0	0	0	0	0	0	0
GM6757	0	0	0	0.0236	0	0	0	0	0	0	0	0	0	0	0.0275	0.0283	0	0
GM3605	0	0	0	0	0	0	0	0	0	0	0	0	0	0	0	0	0	0
GM28388	0	0	0	0	0	0	0	0	0	0	0	0	0	0	0	0	0	0
GM8384	0	0	0	0	0	0	0	0	0	0	0	0	0	0	0	0	0	0
4933411E06RIK	0	0	0	0	0	0	0	0	0	0	0	0	0	0	0	0	0	0
GM8391	0	0	0	0	0	0	0	0	0	0	0	0	0	0	0	0	0	0
GM27330	0	0	0	0	0	0	0	0	0	0	0	0	0	0	0	0	0	0
GM29665	0	0	0	0	0	0	0	0	0	0	0	0	0	0	0	0	0	0
GM20118	0	0	0	0	0	0	0	0	0	0	0	0	0	0	0	0	0	0
GM25843	0	0	0	0	0	0	0	0	0	0	0	0	0	0	0	0	0	0
GM28321	0.0846	0.1384	0.0621	0.2767	0.1428	0.3318	0.6614	0.2471	0.328	0.445	0.3044	0.3816	0.1929	0.1296	0.1413	0.1038	0.1116	0.1007
TMEFF2	0.3081	0.4323	0.2299	0.012	0.0566	0.0153	0.1996	0.2763	0.3035	0.072	0.1152	0.0567	2.6634	2.6209	2.4869	0.3962	0.3949	0.3495
GM28322	0	0	0	0	0	0	0	0	0	0	0	0	0	0	0	0	0	0
GM25736	0	0	0	0	0	0	0	0	0	0	0	0	0	0	0.9304	0	0	0
GM28319	0	0	0.2132	0	0	0	0	0	0	0	0	0	0	0	0	0	0	0
GM28320	0	0	0	0	0	0	0	0	0	0	0	0	0	0	0.0207	0.0213	0	0
GM29325	0	0	0	0	0	0	0	0	0	0	0	0	0	0	0.0186	0	0	0
9330175M20RIK	0.0193	0.021	0	0	0	0	0	0	0	0	0.0505	0.0994	0.0703	0.0675	0.0736	0.0947	0.0611	0.0367
CAVIN2	58.1995	60.0405	58.508	4.6229	5.6248	6.453	36.384	34.8237	32.9173	32.9233	33.7693	31.1421	54.8735	51.5742	54.6596	65.8952	67.2501	72.746
GM5253	0	0	0	0	0	0	0	0	0	0	0	0	0.0438	0	0.0458	0	0	0
1700072G22RIK	0	0	0	0	0	0.0939	0	0	0	0.3779	0	0	0.0819	0	0	0	0	0
NABP1	0.961	1.1816	1.2756	0.9896	0.9664	0.9146	3.9137	3.0903	3.3233	4.1429	4.4483	4.0304	3.0211	2.7733	2.6815	3.4621	3.9662	4.1592
GM17767	0.0124	0	0.0242	0	0	0.0129	0	0	0	0	0	0	0.0338	0.0325	0	0.0486	0.1044	0.0236
GM37535	0	0	0	0	0	0	0	0	0	0	0	0	0	0	0	0	0.022	0
GM28055	0	0.0378	0.0339	0	0	0	0.0471	0	0	0	0	0	0.0316	0.0607	0	0	0.0366	0.066
MYO1B	18.3168	19.2751	18.6071	0.3095	0.4311	0.4436	5.2211	4.4997	5.222	1.3561	1.8498	1.722	9.4158	7.9885	8.2764	11.2092	11.4387	10.8981
GM29453	0	0.042	0	0	0	0	0	0	0	0.054	0	0.0496	0	0.0337	0	0	0	0.0733
GM28323	0	0.0215	0.0193	0	0	0	0	0	0	0	0	0	0	0.0172	0.0188	0.0193	0.1455	0
GM8419	0.1194	0.6516	0	0	0	0	0	0.3102	0	0	0	0	0	0	0	0.3518	0.2521	0
GM27607	0	0	0	0	0	0	0	0	0	0	0	0	0	0	0	0	0	0
GM8420	0	0	0.564	0.2691	0.1588	0.2582	0.4476	0.1068	0.3191	0	0	0	0.3753	0.5764	0.7857	0.4039	0.4342	0.0784
STAT4	0.0381	0.0416	0.0373	0.052	0.0368	0.0399	0	0	0	0	0	0	0	0	0	0.0125	0.0268	0.0484
GM28177	0.1811	0.2584	0.191	0.0684	0.0269	0.0729	0.0189	0.0543	0.018	0.0782	0	0	0.1271	0.122	0.0665	0.0274	0.0588	0.0133
GM3940	0.4555	0.4972	0.223	0.7451	0.2198	0.3574	0.1549	0.5916	0.4417	0.4794	0.1491	0.1468	0.3117	0.3989	0.2175	0.4473	0.1202	0.6511
GM31812	0.1682	0.3671	0.2882	0.2407	0.4869	0.176	0.1144	0.1638	0.0544	0.059	0	0.2711	0.3836	0.2946	0.3614	0.7432	0.799	0.7212
STAT1	83.639	83.4793	82.7407	14.0559	13.7029	15.583	5.9337	5.6027	5.8638	1.0396	1.3686	1.5265	2.5079	2.2558	2.5989	4.1341	4.3053	4.7437
GM18301	0.3324	0.6047	0.1085	0	0.1069	0.1159	0	0	0.0716	0	0	0.0714	0	0.1456	0.0529	0.2176	0	0
GLS	23.9599	24.5315	24.0876	19.1923	21.0312	23.8269	31.3153	28.6315	26.9348	33.6751	36.9741	33.181	22.5861	19.7895	22.0337	18.7024	19.8635	19.5667
GM5975	0	0	0	0	0	0	0	0	0	0	0	0	0	0	0	0	0	0
GM23460	0	0	0	0	0	0	0	0	0	0	0	0	0	0	0	0	0.4765	0
NAB1	22.8948	25.4202	22.4088	13.3271	14.2176	15.8183	21.6427	19.2155	19.9663	30.4417	32.9685	29.1914	20.3178	17.4544	17.9689	15.047	14.2754	14.7945
GM5976	0	0	0	0.0404	0	0	0.0672	0	0	0	0	0	0	0	0	0	0	0
RPS27A-PS1	0.1063	0	0.2081	0	0.3076	0	0.2891	0	0	0.2982	0.1391	0.274	0	0.3722	0.1015	0.1043	0.3365	0
GM553	0	0	0	0	0	0	0	0	0	0	0	0	0	0	0	0	0	0
GM28178	0	0	0	0	0	0	0	0	0	0	0	0	0	0	0	0	0	0
GM5527	0.1533	0.2509	0.2251	0.0627	0.1479	0.1604	0	0.1991	0.0991	0.1075	0.3009	0	0	0	0.1464	0	0.0809	0.073
NEMP2	1.3762	1.411	1.2524	1.893	2.1461	2.0507	1.8909	1.9228	1.7793	0.7607	0.7643	0.8871	1.6551	1.5035	1.7989	1.4879	1.4968	1.457
GM37242	0	0.0258	0.0693	0	0.0228	0.0494	0.0321	0.1226	0	0	0.0309	0.0608	0.0646	0	0.0225	0	0	0.0225
MFSD6	12.9045	13.8495	13.0294	5.519	6.7129	7.723	7.5692	6.8623	7.4263	5.1412	6.9162	6.8427	0.2563	0.2355	0.1027	0.1174	0.2019	0.0911
GM29670	0.0395	0	0.0193	0.0323	0.0191	0	0.0269	0.0513	0	0.0277	0	0.0509	0	0	0	0	0	0
GM28650	0	0	0	0	0	0	0.1628	0	0	0	0	0	0	0	0	0	0	0
INPP1	7.4558	7.7551	7.361	5.5496	5.7683	5.9998	3.087	2.6211	2.757	3.3875	3.8479	3.4855	4.1548	4.1284	4.5894	4.8236	4.6386	4.1942
HIBCH	8.7855	8.9596	9.2079	7.3181	6.9414	7.4673	9.2223	9.9445	8.2094	8.5792	9.0236	8.364	9.4003	8.5827	9.701	11.1627	12.5227	12.5023
GM16107	0	0	0	0	0	0	0	0	0.0738	0	0	0	0	0	0	0	0	0
1700019D03RIK	1.2953	1.0665	0.9013	0.2509	0.1425	0.3923	0	0	0.0147	0.0159	0	0.0146	0.0311	0	0	0.0335	0.012	0.0108
MSTN	0	0	0	0.0149	0.1053	0.019	0	0	0	0	0	0	0	0.0159	0	0	0	0
GM24349	0	0	0	0	0	0	0	0	0	0	0	0	0	0	0	0	0	0
1700019A02RIK	0.2533	0.2764	0.186	0.1036	0.0611	0.3975	0	0	0	0	0.0829	0.1633	0	0	0.1209	0	0	0
PMS1	5.0032	4.763	4.8293	4.0866	3.9589	3.972	3.8686	4.3207	3.6265	3.945	4.7389	4.3815	3.3207	2.9077	3.2457	1.9857	2.3688	2.3929
GM28777	0.2759	0.8029	0.9906	0.6769	0.3549	0	0	0	0	0.129	0.4815	0	0	0.4832	0.3513	0	0.0971	0
ORMDL1	10.8086	10.5203	11.1267	10.7445	11.7993	11.0134	8.7786	8.9517	7.5745	9.5394	8.3112	7.9973	5.3925	4.7008	5.4455	2.5637	2.756	2.6766
GM28778	0.0627	0	0	0.205	0.2419	0.3934	0.2557	0.407	0.6482	0.8794	1.8048	0.7272	0.4002	0	0.0599	0	0.0662	0.0597
OSGEPL1	4.1778	4.8131	5.0005	4.8111	4.8419	4.8902	2.8087	2.9417	2.3593	5.0986	4.0648	3.7249	3.5121	3.3153	3.516	2.2006	2.6022	2.6995
GM28551	0.0939	0.0171	0.046	0.0896	0.136	0.0983	0.1491	0.2034	0.1822	0.2637	0.3689	0.1817	0.1286	0.0686	0.1196	0.1538	0.1322	0.0597
GM18800	0	0.0407	0.0365	0	0.036	0	0.1015	0	0.0482	0	0	0.0962	0	0.0653	0.0712	0.0366	0	0
ASNSD1	14.8094	15.3872	14.7621	13.5262	13.6703	13.8748	14.6434	13.5652	12.9449	10.6445	10.7147	10.8766	9.3761	8.2432	8.6299	6.9837	7.6546	8.2378
GM28779	0	0	0	0	0	0	0	0	0	0	0	0	0	0	0	0	0	0
GM6799	0	0	0	0	0	0	0	0	0	0	0	0	0	0	0	0	0	0
GM6801	0	0	0	0	0	0	0	0	0	0	0.3799	0.1871	0.1324	0	0	0	0	0
DNAH7A	0.3314	0.4206	0.4453	0.0441	0.0372	0.0443	0.0052	0	0.005	0	0	0.0149	0	0	0	0	0	0
GM25240	0	0	0	0	0	0	0	0	0	0	0	0	0	0	0	0	0	0
STK17B	15.1814	18.2264	15.2573	14.3175	15.8749	16.8663	32.24	28.5652	26.51	18.5596	17.9221	14.1286	10.1625	8.8495	9.8048	6.0563	6.0798	6.8348
GM37863	0	0	0	0	0	0	0	0	0	0	0	0	0	0	0	0	0	0
HECW2	0.4864	0.4935	0.4726	0.0653	0.0623	0.0239	0.0879	0.153	0.1376	0.0533	0.0348	0.0343	0.0797	0.0666	0.0798	0.0336	0.0361	0.0253
MIR7681	0	0	0	0	0	0	0	0	0	0	0	0	0	0	0	0	0	0
GM24251	0	1.413	0	0	0	0	0	0.5605	0	0	0	0	0.3937	0	0	0	0	0
GM37633	0	0	0	0	0	0	0	0	0	0	0	0	0	0	0	0	0	0
GM25829	1.3794	0	0	0.376	0	0.4811	0	1.1943	0.5945	0	3.0092	0.5928	0.4195	0	0.4391	0	0	0.4381
CCDC150	0.0196	0	0.0192	0	0.0189	0	0	0.0509	0.0253	0	0	0.0758	0.0358	0.0515	0.0936	0.1251	0.0931	0.112
GTF3C3	22.6957	22.5685	23.4191	20.588	22.2358	23.5257	26.3601	24.9096	24.2675	26.6179	27.0405	25.8727	15.6385	12.9122	14.0335	12.0261	13.8771	13.4203
GM34066	0	0	0	0	0	0	0	0	0	0	0	0	0	0	0	0	0	0.0568
PGAP1	1.1551	1.4482	1.1428	1.9524	2.4033	2.7764	1.9579	1.7848	1.6236	0.9766	1.1398	0.84	0.6323	0.5473	0.5572	0.5817	0.4221	0.4515
GM36955	0	0.0647	0	0.0484	0.0286	0.031	0.0806	0	0	0	0	0	0	0	0.0283	0	0	0
GM19637	0	0	0	0	0	0.0889	0	0	0.1099	0	0	0	0	0	0	0	0	0
ANKRD44	0.8954	0.9925	0.8973	3.2785	3.6334	4.0633	1.6712	1.3884	1.2699	0.112	0.259	0.358	0.5794	0.538	0.5867	0.0716	0.0513	0.0992
4930444A19RIK	0.0185	0.0201	0	0.0906	0.0712	0.0965	0.0502	0	0.0716	0	0	0	0	0.0323	0.0352	0	0	0
GM37370	0	0	0	0.2568	0.2357	0.146	0.0475	0	0	0	0	0	0.0318	0	0.0666	0	0	0
GM24053	0	0.5114	0	0.7664	0	0	0	0	0	0	0	0	0	0	0.4475	0	0	0
A130048G24RIK	0	0.0195	0	0.0146	0	0	0	0	0.0231	0	0	0	0.0163	0	0	0	0	0
SF3B1	82.861	89.7428	83.1533	59.9654	63.6137	72.8807	67.0312	60.9455	60.1384	76.7313	82.4427	73.8966	55.8453	47.8019	51.0844	33.4094	33.6632	32.6029
E330011M16RIK	0.9872	0.7183	0.6982	0.157	0.1323	0.0574	0	0.1425	0.1418	0.077	0.1795	0.2475	0.2502	0.1681	0.2095	0.3231	0.0579	0.0261
COQ10B	28.7505	31.0216	32.1958	10.2161	11.1436	12.0191	15.7515	14.5478	14.7864	20.9469	19.3394	17.4372	7.0898	6.0076	6.7569	6.2236	7.2307	7.3948
GM17971	0.6714	0.5996	0.4782	0.0998	0.2945	0.3193	0.2491	0.5549	0.3157	0.5139	0.3995	0.5508	0.3898	0.588	0.1749	0.3596	0.0644	0.2908
HSPD1	941.882	1014.5	959.155	833.116	879.923	975.13	311.725	297.157	300.748	707.05	718.759	626.842	658.297	567.662	588.292	357.465	366.366	356.059
HSPE1	729.049	724.489	767.324	791.899	791.872	753.822	272.399	275.87	249.206	514.982	486.915	434.946	499.987	433.502	464.56	375.176	439.357	417.781
GM5147	0	0.1353	0.0607	0.152	0.1196	0	0.0843	0.1609	0.3204	0.2608	0	0.1598	0.1131	0.1085	0.1775	0.0608	0	0.2362
GM16581	0	0	0.0486	0	0	0	0.1351	0	0	0	0.065	0.064	0	0	0	0	0	0
MOB4	35.335	36.9398	39.8228	40.684	42.6783	43.8496	34.6106	34.6788	29.3469	34.3386	34.2217	31.4191	15.9009	13.3645	17.2553	13.3737	16.2593	15.149
GM6822	2.0833	1.5741	1.0985	1.5728	1.3916	1.509	0.6539	1.0406	0.6216	0.8994	2.0976	0.6198	0.731	0.5614	1.0713	1.1015	0.8458	0.4581
RFTN2	0.1592	0.1006	0.0903	0.514	0.4124	0.6137	6.2349	5.6375	6.4679	7.7604	8.6653	10.0146	4.327	4.2563	4.0255	5.8012	5.9709	5.6289
GM10561	0.0506	0.0553	0.0248	0.1864	0.0244	0.106	1.3777	1.4469	2.1606	1.3501	2.2206	1.9912	1.0857	1.1974	1.1607	1.7902	1.871	1.5199
MARS2	6.6169	6.5515	6.2281	4.6243	4.5393	5.3642	3.4781	3.502	3.8015	5.9962	7.2016	6.9469	4.4669	4.1238	4.0936	2.6692	2.8004	2.565
BOLL	0.014	0.0306	0	0.0115	0	0.0293	0	0	0.0362	0.0393	0	0.0722	0	0	0.0134	0.0687	0.0443	0.0267
GM8292	45.3461	44.7462	52.1933	73.7668	78.9954	73.3091	12.3361	16.9421	16.8654	1.3946	1.1383	1.922	29.582	37.6443	38.917	36.9648	41.1796	44.3901
GM29138	0.4241	0.7715	1.1075	1.3875	0.5456	0.1479	0.7692	0.1836	0.5483	0.3967	0.1851	0.3645	0.2579	1.3619	0.6751	0.9718	1.1939	0.8082
GM8531	0	0	0	0	0	0	0	0	0	0	0	0	0.0503	0	0	0	0	0
PLCL1	0.0662	0.1365	0.0576	0.0181	0.0071	0.0231	0.7706	0.516	0.4756	0.3407	0.4719	0.5312	0.5974	0.5219	0.5832	0.643	0.5126	0.5117
GM38056	0.0685	0.032	0.0192	0.056	0.0472	0.0512	0.1065	0.0381	0	0.0275	0.0384	0.0379	0.0982	0.0771	0.0561	0.0096	0.0826	0.0093
GM6644	0	0	0	0	0	0	0	0	0	0	0	0	0	0	0	0	0	0
GM37382	0	0	0	0	0	0	0	0	0	0.0433	0	0	0.0281	0	0	0	0	0
9130227L01RIK	0	0.0229	0.1233	0	0	0	0	0	0	0	0	0	0	0	0	0.0824	0.0221	0.04
GM36986	0	0	0	0	0	0	0	0	0	0	0	0	0	0	0	0	0	0
1700003I22RIK	0	0	0	0	0	0	0	0	0	0	0	0	0	0	0	0	0	0
GM28900	0	0.6884	0	0.2579	0.6086	0	0.429	0	0	0	0	0	0.8631	0	0	0.3097	0	0.601
GM28240	0	0	0	0	0	0	0	0	0	0	0	0	0	0	0	0	0	0
HSFY2	0	0	0	0	0	0	0	0	0	0	0	0	0	0	0	0	0	0
SATB2	0.6305	0.6249	0.7452	0.3557	0.5594	0.637	0.5028	0.5836	0.5903	0.6305	1.2713	0.7942	1.8382	1.2631	1.2944	0.7259	0.4667	0.511
9130024F11RIK	0.2469	0.3902	0.3585	0.195	0.1479	0.2138	0.4863	0.4975	0.6054	0.3464	0.7689	0.7244	1.6931	1.3121	1.6505	0.535	0.7459	0.7787
GM4081	0.0268	0	0	0	0	0	0	0	0	0	0	0	0	0	0	0	0.0565	0
GM23943	0	0	0	0.6651	0	0	0	0	0	0	0	0	0	0	0	0	0	0
1700126A01RIK	0	0	0	0	0	0	0	0	0	0	0	0	0	0	0	0	0	0
BC055402	0	0.0163	0.0438	0	0	0	0	0	0	0	0	0	0.0136	0	0.0142	0	0.0157	0
GM5254	0	0	0	0	0	0	0	0	0	0	0	0	0	0	0	0	0	0
4930558J18RIK	1.6783	1.6224	1.8079	2.1373	2.776	2.2826	1.6306	1.9929	1.6119	2.5568	2.7931	2.5655	2.0342	1.6797	1.328	1.342	1.9235	1.2564
1700066M21RIK	13.4133	12.6479	14.2674	12.8607	13.0595	12.9516	17.1901	14.0828	12.682	18.6932	18.2145	15.0968	10.3502	9.4559	10.2249	9.5426	9.6804	9.7809
TYW5	8.8303	9.1214	8.6131	9.1994	9.3315	9.147	5.6481	5.4839	5.7083	11.4317	9.5863	9.4416	4.6993	4.3575	4.6349	5.2818	6.8616	6.0264
MAIP1	4.1778	4.4167	4.4644	3.9634	3.4828	3.6719	2.7097	2.5143	2.3415	2.9881	3.8665	3.3573	2.7746	2.2696	2.5288	2.3119	2.8017	2.5527
GM22371	0	0	0	0	0	0	0	0	0	0	0	0	0	0	0	0	0	0
GM24014	0	0	0	0	0	0	0	0	0	0	0	0	0	0	0	0	0	0
GM8581	0	0	0	0	0	0	0	0	0	0	0	0	0	0	0	0	0	0
GM37373	0	0	0	0	0	0	0	0	0	0	0	0	0	0	0	0	0	0
GM17929	0	0	0	0	0	0	0	0	0	0	0	0	0	0	0	0	0	0
SPATS2L	2.8022	2.8314	2.5644	4.1082	4.7699	4.8009	0	0	0.0079	0	0	0.0079	0	0.0054	0	0.012	0.0065	0
GM17234	0	0	0	0	0	0	0	0	0	0	0	0	0	0	0	0	0	0
KCTD18	1.6534	1.7715	1.7343	1.4887	1.6173	1.6347	3.0022	2.7631	2.6967	2.9639	3.0777	2.9726	1.0206	0.8967	0.9815	1.1135	1.237	1.1093
SGOL2A	11.5288	13.2649	10.5199	15.0621	15.5679	17.5713	24.7259	21.6846	21.8589	21.5659	22.7373	18.7916	6.6297	5.5585	6.0349	4.1919	4.447	3.9336
AOX1	0.3567	0.4881	0.3604	0.5371	0.6555	0.6279	0.6623	0.8676	0.6661	0.6991	0.993	1.0364	0.3047	0.3123	0.3677	0.1167	0.1076	0.0917
AOX3	0	0.0229	0.0069	0.0172	0.0067	0.0146	0.019	0	0	0	0	0.009	0	0	0	0.0275	0	0.0067
GM24548	0	0	0	0	0	0	0	0	0	0	0	0	0	0	0	0	0	0
AOX4	0.0877	0.1212	0.103	0.0908	0.0677	0.055	0	0	0	0	0	0.0075	0	0	0.0056	0	0	0
GM15759	0.0132	0	0	0	0	0	0	0	0	0	0	0	0	0	0	0	0	0
AOX2	0.017	0.0279	0.0334	0.1325	0.1234	0.1516	0.0116	0.0221	0.022	0.0239	0.0223	0.011	0.0467	0.0373	0.057	0.0167	0.009	0.0244
GM37607	0.1313	0.1228	0.0184	0.2608	0.3981	0.314	0.0255	0.0244	0.1455	0.1579	0.5156	0.266	0.2224	0.1643	0.2687	0.0553	0.1386	0.0179
BZW1	270.665	296.291	283.527	253.301	264.099	276.238	200.376	192.163	170.838	369.726	353.557	301.215	182.649	160.062	171.91	72.8071	82.2593	77.4912
CLK1	5.2392	4.9258	5.5335	6.0859	6.3218	5.8992	20.0462	18.4804	17.9041	10.6877	10.9837	10.4202	6.568	7.2054	7.3436	10.7231	11.5401	11.1829
PPIL3	17.817	17.4438	18.4248	14.8531	16.6933	16.9975	8.9829	8.8599	8.1083	17.0048	15.9231	15.0916	8.5875	8.5546	8.6393	6.4624	7.056	6.9478
NIF3L1	14.4557	14.0965	13.4053	9.4073	8.4935	9.3821	12.2839	12.6261	12.0364	16.0066	16.2591	15.3438	6.5102	5.6776	5.8285	4.5118	4.703	4.408
ORC2	76.6086	74.2577	80.7928	56.8547	60.958	62.1352	32.8264	30.2002	28.5959	88.7205	79.7083	70.3327	39.0996	33.4219	33.975	23.5979	24.1288	24.6959
GM23966	0	2.0073	0	1.1281	0.8873	0.4811	0.6254	0.5972	0.5945	0.6452	0.6018	1.1855	0	2.4159	1.3173	0.4515	0	0
GM15834	0.0533	0.0582	0.0104	0.0959	0.0617	0.0892	0.1015	0.0831	0.1102	0.1346	0.0977	0.0824	0.2236	0.2427	0.2138	0.1675	0.1238	0.2133
FAM126B	5.2258	5.1328	5.6697	3.5688	3.6427	4.3645	3.2679	2.9504	2.7786	2.2474	2.3586	1.949	1.1145	0.9768	1.4243	1.7172	2.0746	2.1061
NDUFB3	169.579	156.371	178.443	159.733	155.97	147.469	110.07	101.915	99.7868	123.951	113.181	109.977	104.178	105.48	105.732	98.6471	108.496	103.397
GM29389	0	0	0	0	0	0	0	0	0	0	0	0	0	0	0	0	0	0
GM18802	0	0	0	0	0	0	0	0	0	0	0	0	0	0	0	0	0	0
CBX3-PS7	0.5348	0.9727	0.6982	1.2392	1.5479	1.2122	0.8486	1.5048	1.2675	0.6253	0.9333	1.4937	0.4065	0.8586	1.0214	0.4376	0.8467	0.4246
ALS2CR12	0	0	0	0	0.0419	0	0.2956	0.2258	0.2997	0.5692	0.4741	0.579	0.0529	0.0634	0.0138	0	0.0612	0.0138
GM20257	2.2076	2.0078	2.0074	0.6448	0.6593	0.9349	1.5014	0.9557	2.0387	5.4577	5.7105	4.5401	2.0619	1.8412	2.8111	0.9807	0.8323	0.601
GM28803	0	0	0	0	0	0	0	0.0836	0	0	0	0	0	0	0	0	0	0
CFLAR	5.755	6.0269	5.7347	4.9259	5.6953	6.854	7.1784	5.9059	6.7327	8.3805	10.5881	9.6724	3.7341	3.3702	3.6864	3.5883	3.509	3.541
GM3841	0	0	0	0	0	0	0	0	0	0	0	0	0	0	0	0	0	0
CASP8	15.016	14.3844	15.2545	14.6175	14.0947	16.8313	35.7381	33.2179	33.1776	46.7933	49.4837	37.9942	18.1053	15.5628	15.6888	12.04	11.9198	10.8562
GM37760	0.0769	0.0839	0.0753	0.0314	0	0.0268	0.0348	0.0333	0.0331	0.1438	0.1844	0.0661	0.1402	0.1795	0.159	0.0503	0.0811	0.0854
GM28802	0.2606	0	0.051	0	0	0	0.638	1.3537	0.3369	0.585	0.4775	0.4703	0.0951	0.0913	0.0995	0	0.165	0
TRAK2	16.0822	17.0147	16.2724	17.8873	20.9419	22.4756	8.1194	6.9503	8.3726	11.1224	16.2448	16.5008	8.9728	8.2607	8.2529	7.0884	6.0521	6.2761
STRADB	2.6375	2.7751	2.6161	1.037	0.8636	1.135	3.9381	3.9274	4.1814	2.0265	2.6093	2.8933	1.8124	1.6923	1.7937	1.9308	2.0613	2.1384
C2CD6B	0	0	0	0	0	0	0	0	0	0	0	0	0	0	0	0.055	0	0.1068
GM29018	0	0	0	0	0	0	0	0	0	0	0	0	0	0	0	0	0	0
C2CD6	0.0223	0	0	0.0548	0.0215	0	0.0607	0	0.0866	0	0.0584	0.1151	0.0611	0	0	0.0438	0	0.0213
GM25502	0	0	0	0	0	0	0	0	0	0	0	0	0	0	0	0	0	0
TMEM237	21.417	21.8468	22.5868	12.716	13.1936	14.2847	28.2355	25.7562	23.7494	30.3987	37.2801	32.3104	9.5252	8.5303	10.345	7.8462	8.5868	6.5929
G730003C15RIK	0.2131	0.5814	0.1878	0.2614	0.1645	0.2006	0.4637	0.5811	0.6336	1.1361	0.7809	0.9889	0.486	0.3918	0.5494	0.3766	0.2474	0.3451
MPP4	0.0139	0.0228	0.0205	0.0627	0.0269	0.0802	0.2274	0.1086	0.2341	0.1466	0.1459	0.2604	0	0.0183	0.0266	0.0068	0.0074	0
GM29017	0.047	0.0257	0.0461	0.1346	0.1815	0.1476	0.4158	0.1527	0.2128	0.099	0.0308	0.091	0.0215	0.0618	0.0674	0	0.0248	0.0448
GM19125	0	0.0388	0	0	0	0	0.0484	0	0	0	0	0	0	0	0	0	0	0
ALS2	7.6107	9.0925	6.8087	7.3388	8.4331	9.1172	10.2817	8.8886	10.1278	4.3618	7.0393	7.1	2.3774	2.2186	2.1919	1.9129	2.0509	1.6488
CDK15	0	0	0	0.4333	0.2462	0.3901	0.0534	0.0255	0.0507	0	0	0	0.0358	0.0172	0.0187	0	0	0.0187
GM29016	0	0	0	0	0	0	0	0	0	0	0	0	0	0	0	0	0	0
GM37737	0	0.0328	0.1177	0.0737	0.1159	0	0	0	0	0	0	0	0	0	0	0	0	0
FZD7	17.9551	18.8266	15.4358	14.2585	15.2714	16.5479	32.6919	29.819	31.6771	20.8073	25.5346	25.1493	9.0915	8.1852	8.0451	9.9883	8.8351	8.585
GM26813	0.1509	0.1497	0.094	0.0785	0.0926	0.043	0.2612	0.1781	0.1596	0.2887	0.2513	0.2829	0.0626	0.0721	0.0655	0.0673	0.0579	0.0523
GM973	0.0449	0.0587	0.0703	0.0147	0.0087	0.0188	0.061	0.0117	0.0232	0.0126	0.0352	0.0116	0.0737	0.0864	0.0942	0.0352	0.0379	0.0427
GM28411	0	0	0	0	0	0	0	0	0	0	0	0	0	0	0	0	0	0
1700122D07RIK	0	0	0	0	0	0	0	0	0	0	0	0	0	0	0	0	0	0
SUMO1	91.6645	100.847	100.766	98.4009	99.1228	98.3578	74.6235	73.0062	64.9243	93.407	93.3085	77.6327	60.1468	51.697	59.7272	47.1237	53.2094	50.85
GM24545	0	0	0	0	0	0	0	0	0	0	0	0	0	0	0	0	0	0
D430013B06RIK	0.0788	0.0574	0.1544	0.129	0.2536	0.055	0.0715	0.1024	0.2039	0.1844	0.172	0.2372	0.1199	0.069	0.1757	0.0774	0.2497	0.0751
GM29596	0	0	0.1251	0.1045	0	0	0	0	0	0	0	0.1647	0	0	0.2441	0.1255	0	0
NOP58	46.1654	47.5663	47.3096	41.3136	44.2393	46.1998	23.14	24.7256	22.0537	68.5835	67.7978	55.4255	36.1551	30.5931	32.9044	23.9352	26.1213	26.1918
SNORD70	5.0894	4.9375	6.0915	9.7122	3.8194	7.6913	6.1535	5.141	8.0422	15.8696	12.5835	12.3936	9.2862	12.3805	11.8813	6.1082	8.3571	12.9313
GM26293	0	0	0	0	0	0	0	0	0	0	0	0	0	0	0	0	0	0
GM26287	12.1475	8.6178	7.1375	13.4121	14.651	11.4383	1.6523	9.466	11.779	13.6361	8.7454	25.0572	14.4069	20.2124	14.5016	4.7714	3.2058	6.3659
SNORD11	12.885	5.7531	7.4562	8.6221	12.4324	9.8043	11.9499	9.128	4.5433	17.2582	20.6993	21.142	20.8386	22.055	16.221	10.3522	16.0747	12.277
BMPR2	3.5893	4.5057	3.7534	3.5598	4.3475	5.0777	4.1083	3.4501	3.8978	4.5067	6.7753	5.5515	3.6639	2.5324	2.8531	2.759	2.4287	2.8752
GM38125	0.0429	0	0.028	0.0234	0	0.0449	0.0195	0	0	0.0602	0.0187	0.1107	0.0131	0.0125	0.0273	0.0141	0.0302	0
GM37977	0	0	0	0	0	0	0	0	0	0	0.0893	0.088	0.0623	0.0598	0	0	0	0
FAM117B	8.348	8.0138	8.0297	6.2811	6.2381	7.6608	13.8796	12.3409	12.9482	8.6646	12.376	12.894	7.4128	6.7552	6.877	8.1313	7.0313	7.5876
GM37531	0	0	0.0089	0	0	0.019	0.0124	0.059	0.0352	0.0127	0.0119	0.0351	0.0414	0.0318	0.0434	0.0535	0.0096	0.0433
GM18829	0	0.0662	0.0594	0.0248	0	0	0.0413	0.0394	0.0392	0.0851	0.0397	0.0391	0	0	0.029	0.0596	0	0.0289
ICA1L	0.2021	0.0702	0.1169	0	0.0266	0	0.05	0.0119	0.0119	0.0258	0.024	0.0474	0.0335	0.0241	0	0.018	0.0194	0.0088
WDR12	9.8559	9.8408	9.8211	10.4638	10.5977	10.5313	4.9371	5.1897	4.8683	10.0878	10.2347	9.1996	8.4961	7.5069	7.935	6.308	6.3815	6.3795
CARF	0.8077	0.7672	0.8406	1.1637	1.3728	1.2729	0.7861	0.7418	0.6642	0.4695	0.5441	0.427	0.7122	0.5949	0.7424	1.1649	1.2701	1.3106
GM15464	1.4839	1.2458	2.4592	2.1472	1.7622	1.7914	2.0184	1.9273	2.804	2.5627	3.2871	2.0602	1.9786	2.1992	2.0713	3.5869	2.1689	3.6979
NBEAL1	1.1901	1.382	1.2671	1.5435	1.7074	2.0939	3.0188	2.6016	2.601	2.8107	3.7813	3.1132	1.1678	0.8801	1.0689	1.1398	1.1504	1.3614
GM29332	0	0	0	0	0	0	0	0	0	0	0	0	0	0	0	0	0	0
CYP20A1	46.1414	46.8602	48.4313	55.2679	63.8944	63.3385	23.5652	23.6185	20.3954	40.1936	39.495	34.0991	46.6894	46.2882	49.3282	35.9687	35.8492	34.7571
6030460B20RIK	0.1395	0.0508	0	0.038	0	0.0487	0.0633	0	0.3006	0.1305	0.0609	0.0599	0	0.0814	0	0	0.0491	0.2215
ABI2	14.3682	14.01	13.6815	15.8346	17.8697	19.7744	6.7209	5.9909	6.5074	7.0948	8.2014	8.1519	11.385	9.7132	10.4607	9.6022	9.1612	8.461
RAPH1	0.78	0.9483	0.8626	0.7734	0.7966	1.0773	0.715	0.7699	0.661	0.9093	0.8074	0.7148	0.5211	0.2438	0.3736	0.5326	0.6005	0.59
GM11575	3.4524	4.2391	4.2262	3.8825	2.082	2.9348	1.761	2.5222	2.7898	3.3305	3.9542	3.06	3.1497	3.4014	5.1519	3.814	4.1	2.8783
GM11576	0	0	0	0	0	0	0	0	0	0	0	0	0	0	0	0	0	0
GM11578	0	0	0	0	0	0	0	0	0	0	0	0	0	0	0	0	0	0
GM38388	0	0	0	0	0	0	0	0	0	0	0	0	0	0	0	0	0	0
GM23762	0	0	0	0	0	0	0	0	0	0	0	0	0	0	0	0	0	0
GM11577	0	0	0	0	0	0	0	0	0	0	0	0	0	0	0	0	0	0
EIF4A-PS4	7.7149	8.1998	7.3177	9.9765	9.2756	10.4382	9.1204	8.2362	8.9822	13.0924	11.2617	10.1023	10.9444	9.8691	10.9169	7.2981	7.5896	6.9275
CD28	0.0161	0.0263	0.0079	0.0263	0.0078	0.0336	0	0	0	0	0	0	0	0	0	0	0	0.0153
GM11579	0	0	0	0	0	0	0	0	0	0	0	0	0	0	0	0	0	0
2310016D23RIK	0	0	0	0	0	0	0	0.494	0	0	0.166	0	0	0.111	0	0.1245	0	0
GM37198	0	0	0	0	0	0	0	0	0	0	0	0	0	0	0	0	0	0
GM11609	0	0	0	0	0	0	0	0	0	0	0	0	0	0	0	0	0	0
GM11581	0	0.0704	0.0631	0	0	0	0.0877	0	0	0	0.0844	0.0831	0.0588	0	0.0616	0.0633	0	0
GM38137	0	0	0	0	0	0	0	0	0	0	0	0.0453	0	0	0	0	0	0
CTLA4	0	0	0	0	0	0	0	0	0	0	0	0	0.0385	0	0	0	0	0.0402
RPL18-PS1	6.4659	8.489	7.9838	7.5108	8.0472	8.4317	8.6677	7.6675	10.904	6.706	7.1144	7.8527	14.2771	13.869	13.8718	17.9439	12.3651	15.7146
GM11582	0.6254	0.455	1.0207	0.682	0.8046	0.6543	0.8507	0.2707	0	0.8775	0.5457	0	0.5705	0.9128	0.5973	0	0.2201	0.3973
ICOS	0.1578	0.2035	0.1826	0	0	0	0	0	0	0	0	0	0	0	0	0	0	0
GM37039	0	0	0	0	0	0	0	0	0	0	0	0	0	0	0	0	0	0
RPL17-PS1	0.0891	0.0973	0	0	0	0.0932	0.1212	0	0	0	0	0.1149	0	0	0	0	0	0
GM11590	0	0	0	0	0	0	0	0	0	0	0	0	0	0	0	0	0	0
GM11591	0	0.0765	0	0	0.0676	0.0733	0	0	0	0	0	0	0	0	0	0	0	0.0668
GM28083	0	0	0	0	0	0	0	0	0	0	0	0	0	0	0	0	0	0
GM11587	0	0	0	0	0	0	0	0	0	0	0	0	0	0	0	0	0	0
9530026F06RIK	0	0	0	0	0	0	0	0	0	0	0	0	0	0	0	0	0	0
GM11588	0	0	0	0	0	0	0	0	0	0	0	0	0	0	0	0	0	0
GM25839	0	0	0	0	0	0	0	0	0	0	0	0	0	0	0	0	0	0
GM28449	0	0	0	0	0	0	0	0	0	0	0	0	0	0	0	0	0	0
GM36943	0	0	0	0	0	0	0	0	0	0	0	0	0	0	0	0	0	0
GM28094	0	0	0	0	0	0	0	0	0	0	0	0	0	0	0	0	0	0
4930587A21RIK	0.0578	0	0	0	0	0	0	0	0	0	0	0	0	0	0	0	0	0
PARD3B	3.0148	3.0699	3.1135	1.0554	1.0935	1.2092	0.5139	0.4664	0.561	0.7715	1.1457	0.8776	0.0239	0.059	0.0536	0.0294	0.0197	0.0214
GM37205	0.018	0.0785	0	0.0294	0.0173	0.0564	0	0.0234	0	0	0	0.0232	0	0	0	0	0	0
GM38012	0	0.0177	0	0	0	0.017	0	0	0	0.0456	0	0.0628	0	0	0	0	0	0
GM38278	0	0	0	0.0884	0	0	0	0	0	0	0.0472	0	0	0	0	0	0	0
PARD3BOS1	0.0248	0	0.0729	0.1014	0.0479	0.0778	0	0	0	0.0348	0.0649	0	0	0	0	0	0	0
GM38075	0.0535	0.1751	0	0	0	0	0	0	0	0	0	0	0	0	0	0	0	0
GM29640	0.3539	0.1931	0	0	0	0	0	0	0	0	0	0	0	0	0	0	0	0
GM29641	0	0	0	0	0	0	0	0	0	0	0	0	0	0	0	0	0	0
PARD3BOS2	0	0	0	0	0	0	0	0	0	0	0	0	0	0	0	0.1255	0.4721	0.2435
GM38351	0	0	0	0	0	0	0	0.0254	0	0	0	0	0	0	0	0	0	0
PARD3BOS3	0	0	0	0	0	0	0	0	0	0	0	0	0	0.1999	0	0.1121	0	0.1631
GM29084	1.0165	1.2204	0.9954	0.9422	0.6865	1.028	1.1983	1.1441	0.9637	0.9984	1.0644	1.7473	0	0	0	0	0.0358	0
GM11600	0	0	0	0	0	0	0	0	0	0	0	0	0	0	0	0	0	0
GM11599	0.5043	0.3669	0.1097	0.2291	0.2703	0.1172	0.2287	0.2183	0.3622	0.5504	0.8068	0.2167	0.4601	0.2454	0.5351	0.3852	0.414	0.5873
NRP2	4.1337	5.2689	4.3573	13.2921	14.4308	16.4388	15.9867	14.2554	16.1461	14.9176	20.6266	19.3995	40.676	35.7313	35.9312	34.7948	31.1198	32.301
GM29083	0	0	0.0657	0.4391	0.1295	0.0702	0	0.2615	0	0.1884	0	0.1731	0.0612	0.3527	0.641	0.0659	0.2834	0.2558
GM37121	0	0	0.0188	0	0	0	0.0524	0.05	0.0249	0	0.0504	0.0496	0.0176	0.0674	0.0184	0.0756	0.0203	0.0734
GM4208	0	0	0	0	0	0	0	0	0	0	0	0	0.0515	0	0	0	0	0
INO80D	1.5221	1.6764	1.4008	1.3107	1.5677	2.0225	0.9218	0.8369	1.0342	1.0679	1.8942	1.9802	1.1149	0.7273	0.7666	0.7173	0.7359	0.7145
GM44468	0	0	0	0	0	0	0	0	0	0	0	0	0	0	0	0	0	0
GM24942	0	0	0	0	0	0	0	0	0	0	0	0	0	0	0	0	0	0
RPS13-PS7	0	0	0	0	0	0	0	0	0	0	0	0	0	0	0	0	0	0
RPS27-PS1	0.2	0.6548	0.1958	0.1636	0.5789	0.6277	0.8161	0.2597	0.7757	0.8419	0.7853	0.5157	1.4596	0.1751	1.719	0.3928	0.4222	0.9528
INO80DOS	0.5296	0.6712	0.6022	0.5309	0.7582	0.7685	0.5112	0.355	0.3975	1.0307	1.3193	1.2333	0.7013	0.8078	0.5873	0.4361	0.4328	0.5697
GM20342	0.1215	0.1933	0.1437	0.1946	0.2002	0.2224	0.1033	0.1643	0.0654	0.0923	0.1458	0.2806	0.1339	0.1596	0.1257	0.1392	0.1229	0.0965
NDUFS1	41.7563	42.7253	43.5905	46.0087	46.2305	49.0216	24.9023	23.7061	23.4415	41.3547	41.7956	36.9057	30.7343	28.4369	29.8262	22.8289	24.1428	22.1742
GM24557	0	0	0	0	0	0	0	0	0	0	0	0	0	0	0	0	0	0
EEF1B2	423.987	418.091	411.952	363.542	352.869	362.014	513.471	505.387	490.039	356.205	527.136	557.082	491.977	504.045	508.634	502.166	525.222	522.097
GM27390	0	0	0	0	0	0	0	0	0	0	0	0	0	0	0	0	0	0
GM26457	0	0	0	0	0	0	0	0	0	0	0	0	0	0	0	0	0	0
SNORA41	11.1812	8.5425	7.2998	7.9254	8.2711	8.5787	3.5488	4.8406	3.3731	11.5055	13.1723	15.376	2.7202	5.8751	7.119	4.3919	5.5081	6.0371
GPR1	0	0.0215	0	0.0161	0.019	0	0.0804	0.0256	0.051	0.083	0.0516	0.0762	0.036	0.0173	0.1129	0.0194	0.0416	0
GM27512	0	0	0	0	0	0.4085	0	0	0	0	0	0	0	0	0	0	0	0
PLATR12	0	0	0	0	0	0	0	0	0	0	0	0	0	0	0	0	0.114	0
1700039I01RIK	0	0	0	0	0	0	0	0	0	0	0	0	0	0	0	0	0	0
GM11608	0	0	0	0	0	0	0	0	0	0	0	0	0	0	0	0	0	0
GM24513	0	0	0	0	0	0	0	0	0	0	0	0	0	0	0	0	0	0
ZDBF2	0	0.0085	0	0	0	0.0041	0	0.005	0	0	0	0	0	0	0	0	0	0
GM23448	0	0	0	0	0	0	0	0	0	0	0	0	0	0	0	0	0	0
GM11606	0	0	0	0	0	0	0	0	0	0	0	0	0	0	0	0	0	0
GM11605	0.3808	0.3325	0.2237	0.3737	0.3674	0.1594	0.4144	0.2967	0.2954	0.8549	0.5981	0.5891	0.5558	0.7336	0.8728	0.3739	0.4824	0.2177
ADAM23	7.8548	6.8637	7.7809	5.4938	5.6437	6.3697	0.0075	0.0071	0.0107	0	0	0.0071	0.0175	0.0241	0.0052	0.0459	0.0435	0.0236
GM22281	0	0	0	0	1.3826	0	0	0	0	0	0	0	0	0	0	0	0	0
DYTN	0	0.0087	0	0	0	0	0	0	0	0	0	0	0	0.007	0	0.0236	0.0169	0
GM12748	0	0	0	0	0	0	0	0	0	0	0	0	0	0	0	0	0	0
MDH1B	0.0286	0	0.1121	0.0468	0	0.0599	0	0	0	0.0402	0	0	0.1044	0.2256	0.1367	0.2529	0.3625	0.2182
FASTKD2	9.4575	8.6673	9.8933	6.4195	6.6843	6.5206	5.4351	5.4724	4.9495	6.9468	9.2984	8.3373	8.9873	7.6514	8.6002	5.7087	6.2784	6.1538
4933402D24RIK	0.1399	0.0611	0.0822	0.1831	0.135	0.0878	0.0381	0.0363	0	0.1178	0.1465	0	0.0511	0.0245	0.0267	0.055	0.1182	0.0267
GM13751	0	0	0	0	0	0	0	0	0	0	0	0	0	0	0	0	0.0691	0
GM13754	0.0493	0	0	0	0	0	0	0	0	0	0	0	0	0	0	0	0	0
GM13749	0.1031	0.1125	0.0673	0	0	0	0.0467	0	0	0	0	0	0	0	0.0984	0	0.2176	0
KLF7	2.1903	2.5887	2.4057	1.9943	2.306	2.165	2.0328	2.0667	2.3312	2.3348	2.3681	2.3558	2.5502	2.2308	2.0629	3.7372	3.3149	3.165
GM26649	0	0	0	0	0	0	0	0	0	0	0	0	0	0	0	0	0	0
MIR6899	0	0.839	0	0	0	0	0	0	0	0	0	0.991	0	0	0	0	0	0
GM13748	0	0.2841	0	0.3193	0.1256	0.2723	0	0.169	0.1683	0	0.6815	0.3356	0	0.6839	0.4972	0.2556	0.1374	0.248
GM13750	0	0.1155	0.1036	0.0865	0	0	0.1439	0	0	0	0	0.1364	0.0965	0.0927	0.101	0	0	0
GM28981	0	0	0	0	0	0	0.052	0	0	0	0	0	0	0	0.0365	0.075	0.0403	0.0728
GM25748	0	0	0	0	0	0	0	0	0	0	0	0	0	0	0	0	0	0
GM28980	0	0	0	0	0	0	0	0	0	0	0	0	0	0	0	0	0	0
CREB1	5.8248	6.6856	6.3317	6.5089	7.071	8.3602	11.0445	10.0991	9.7711	9.4894	12.4091	10.9387	9.1354	7.1985	7.9733	6.5319	7.0104	6.6483
METTL21A	12.2298	11.7219	11.4955	10.8725	9.8888	9.8149	9.3309	8.9518	8.7843	11.8768	11.5295	11.5032	11.0826	9.9072	12.0238	12.4434	12.2878	13.1034
GM28982	0.1922	0.4195	0	0.2358	0	0.6032	0.6535	0.3744	0.6212	0.809	0.7547	0.6194	0.789	0.5049	0.2753	0.1887	0.2029	0.3662
GM29152	0	0	0	0	0	0	0	0.3932	0	0	0	0	0	0	0	0	0	0
2810408I11RIK	5.401	4.5415	4.5894	3.0594	2.5549	2.6825	4.831	5.0494	4.4288	7.608	7.5374	7.4236	5.1766	4.4354	4.0542	2.6002	3.3498	3.2439
CCNYL1	10.0075	10.4563	9.3262	7.4978	7.939	7.4021	5.4798	5.3986	5.8343	9.9075	11.7205	11.4703	6.1688	5.5476	5.6556	4.4313	3.7718	4.5981
FZD5	0.9747	1.3511	1.1844	0.6051	0.7826	0.6997	6.1161	5.4332	5.5834	4.5523	5.597	5.5217	1.5513	1.0717	1.223	2.3195	2.1404	2.1286
GM38058	0	0.0123	0.0221	0	0.0217	0	0.1072	0.3511	0.0874	0.0632	0.0737	0.1307	0.0617	0.0592	0.043	0.0221	0.0594	0.0859
PLEKHM3	1.1172	1.0817	1.1779	0.7369	0.9736	1.0275	1.6299	1.4334	1.8696	1.732	2.1936	1.812	0.9206	0.7653	0.7228	0.9422	0.9178	0.9057
RPL31-PS24	0	0	0	0	0	0	0	0	0	0	0	0	0	0.1137	0	0	0	0
RPL10A-PS1	7.2216	7.8819	8.4717	9.167	11.3955	8.1852	15.6554	16.8044	15.6586	13.4054	9.1575	11.5408	19.6278	19.9611	22.6304	22.8256	22.314	21.001
GM24788	0	0	0	0	0	0	0	0	0	0	0	0	0	0	0	0	0	0
AKR1CL	0.0234	0.0255	0.0343	0	0	0.0978	0	0	0	0	0	0	0.032	0.0102	0	0	0	0
GM8550	0	0	0	0	0	0	0	0	0	0	0	0	0	0	0	0	0	0
CRYGE	0	0	0	0	0	0	0	0	0	0	0	0	0	0	0	0	0	0
CRYGD	0	0	0	0	0	0	0	0	0	0	0	0	0	0	0	0	0	0
CRYGC	0	0	0	0	0	0	0	0	0	0	0	0	0	0	0	0	0	0
CRYGB	0	0	0	0	0	0	0	0	0	0	0	0	0	0	0	0	0	0
GM7329	0	0	0.2294	0.1916	0.4521	0	0	0.6085	0.3029	0	0.6133	0	0.2137	0.4103	0.4475	0	0.2473	0.2232
CRYGA	0	0	0	0	0	0	0	0	0	0	0	0	0	0	0	0	0	0
GM28845	0.0671	0	0	0	0	0	0	0	0	0	0	0	0	0	0	0	0	0
D630023F18RIK	0.0369	0.1208	0.0903	0	0.0356	0	0	0	0	0	0	0	0.2524	0.1454	0.1586	0	0.0779	0.0352
IDH1	22.2285	25.346	24.237	36.7515	39.8118	41.033	65.9051	63.7344	57.6846	60.6621	65.8386	57.2917	42.6317	41.3584	44.9334	55.7549	58.9992	53.8964
PIKFYVE	4.1563	4.4832	4.7098	4.0381	4.3019	4.6942	5.2007	4.8526	5.0426	5.0343	6.2148	5.7513	2.8293	2.3481	2.7148	2.731	2.7817	3.1526
PTH2R	0.1905	0.2288	0.3918	0.0156	0	0.0199	0.1555	0.0247	0.1971	0.3208	0.1746	0.1965	0.0695	0.1502	0.0728	0	0.1006	0
GM28927	0	0	0	0	0	0	0	0	0	0	0	0	0	0	0	0	0	0
GM28926	0	0	0	0	0	0	0	0	0	0	0	0	0	0	0	0	0	0
GM28925	0	0	0	0	0	0	0	0	0	0	0	0	0	0	0	0	0	0
GM28923	0	0	0	0	0	0	0	0	0	0	0	0	0	0	0	0	0	0
GM28922	0	0	0	0	0	0	0	0	0	0	0	0	0	0	0	0	0	0
GM28728	0	0	0	0	0	0	0	0	0.1571	0	0	0	0	0	0	0	0	0
GM5255	0	0	0	0	0	0.1604	0	0	0	0	0	0	0	0	0	0	0	0
GM8805	0.1572	0.1716	0.1539	0.5142	0.3033	0.4933	0.2138	1.0207	0.2032	0.2206	0.2057	0.4053	0.2868	0.5506	0.3002	0.463	0.4978	0.2995
CRYGF	0	0	0	0	0	0	0	0	0	0	0	0	0	0	0	0	0	0
GM8809	0	0	0	0.1625	0	0	0	0	0	0	0	0	0	0	0	0	0	0
GM15659	0.1443	0	0	0.236	0.1392	0.1509	0	0.1874	0.1865	0	0	0	0.2632	0	0.1378	0	0.3046	0
GM8812	0	0	0	0	0	0	0.1624	0	0	0	0	0	0.2179	0	0	0	0	0
MAP2	10.4472	11.0172	11.0392	10.4132	10.6978	12.0975	0.3661	0.4195	0.3712	0.2182	0.3171	0.2699	1.3507	1.1708	1.3568	0.9105	1.1524	0.9803
GM24729	0	0	0	0	0	0	0	0	0	0	0	0	0	0	0	0	0	0
GM10558	0.0296	0	0	0.0727	0	0.062	0	0	0	0	0	0	0	0	0	0	0	0
GM25411	0	0	0	0.2665	0.3144	1.0226	0	0	0	0	0	0	0	0	0	0	0	0.3104
UNC80	2.2515	2.2871	2.4053	2.1496	2.4514	2.6921	0.0177	0	0.0084	0	0	0	0.0059	0	0.0062	0.0096	0.0069	0.0093
GM37181	0	0.0622	0	0.0233	0.055	0	0	0	0	0	0	0	0	0	0	0	0	0.0271
RPE	50.5881	51.4532	52.5737	51.4297	54.2396	56.2013	34.3088	30.5009	28.3196	30.7132	29.3338	25.4478	25.837	22.3795	24.4057	20.0194	22.2215	21.0362
KANSL1L	3.0121	2.9329	3.3546	4.2627	4.1813	4.3022	7.0996	6.0406	6.061	4.1747	4.5998	3.8356	2.0946	2.1658	2.4466	3.3348	3.8109	3.7352
GM37570	0.1109	0.0519	0.0931	0.1943	0.1987	0.116	0.0862	0.1234	0.1434	0.0222	0.0829	0.1634	0.0145	0.0832	0.0151	0.0622	0.0669	0.1358
GM38387	0.3245	0.25	0.187	0.3279	0.2763	0.3396	0.1818	0.3967	0.1728	0.1875	0.1499	0.1231	0.0871	0.0669	0.2006	0.225	0.1411	0.0728
GM38162	0.0428	0.0584	0.0734	0.07	0.0929	0.1456	0.131	0.1668	0.1107	0.0751	0.0841	0.0966	0.0586	0.0469	0.0307	0.0736	0.1582	0.102
GM15789	0	0	0.0355	0.0888	0.0699	0.1894	0.0985	0.047	0.0936	0.1524	0.0948	0.0933	0.033	0.0317	0.0346	0.0711	0.0382	0.207
6820402A03RIK	0.0927	0.1214	0.1089	0.1971	0.1073	0.097	0.3782	0.0963	0.0959	0.2341	0.2184	0.2151	0.186	0.0162	0.1416	0.091	0.1565	0.1943
GM37285	0.5615	0.7071	1.0152	0.6005	1.3336	1.1298	0.3525	0.5049	0.3909	0.6667	0.5654	0.6125	0.4335	0.4161	0.495	0.2969	0.4104	0.3704
GM37755	0.0226	0.0493	0.0221	0.2216	0.0871	0.189	0.0614	0.2346	0.0584	0.0634	0.0296	0.1746	0.0824	0.2175	0.1725	0.1109	0.1192	0.043
GM38218	0	0.0344	0	0	0.0304	0.011	0.0285	0.0136	0.0136	0.0147	0.0137	0.0135	0.0096	0	0	0	0.0222	0
ACADL	27.5064	26.5398	28.4024	24.9847	24.9302	23.9776	46.927	45.5397	45.302	20.1417	28.3928	26.9521	25.3853	25.915	27.0194	20.5289	21.8872	22.4911
GM15793	3.8762	3.0373	3.6012	2.4386	2.0138	2.0797	4.3261	4.776	5.0114	5.4389	4.4233	3.4596	3.7176	4.6131	3.8917	4.8798	3.9868	2.9357
GM27934	0.7809	0.8523	0	0	0	0.817	0	0	0	1.0958	0	0	0.7124	0	0	0	0	0
GM25832	0	0	0	0	0	0	0	0	0	0	0	0	0	0	0	0	0	0
MYL1	0.0237	0.1036	0.1394	0	0.0229	0	0.0323	0	0	0	0	0	0	0	0.0453	0.0233	0.025	0
RPL31-PS14	0.5206	1.8467	0.2549	1.3838	1.507	0.817	1.0622	2.7046	0.8414	1.6436	1.0222	1.6779	0.7124	1.2538	0.4972	1.0224	1.6487	0.496
GM15826	0	0	0	0	0	0	0	0	0	0	0	0	0	0	0	0	0	0
LANCL1	14.1936	15.1706	15.444	9.955	9.5104	9.3975	6.767	7.2992	6.9511	4.808	5.1421	4.6671	7.0565	6.7486	7.5445	13.7618	14.302	14.4665
CPS1	0.0089	0	0.026	0.0145	0	0	0	0.0115	0	0	0	0	0.0081	0	0	0.0087	0	0.0084
GM15668	0	0	0	0	0	0	0	0	0	0	0	0	0	0	0	0	0	0
GM26342	0	0	0	0	0	0	0	0	0	0	0	0	0	0	0	0	0	0
KIF22-PS	0	0	0	0	0	0	0	0	0	0	0	0	0	0	0	0	0	0
GM22548	0	0	0	0	0	0	0	0	0	0	0	0	0	0	0	0	0	0
GM15669	0	0	0	0	0	0	0	0	0	0	0	0	0	0	0	0	0	0
GM37957	0	0	0	0	0	0	0	0	0	0	0	0	0	0	0	0	0	0
GM23189	0	0	0	0	0	0	0	0	0	0	0	0	0	0	0	0	0	0
GM15671	0	0	0	0	0	0	0	0	0	0	0	0	0	0	0	0	0	0
ERBB4	0	0	0	0	0	0.0083	0	0	0	0	0	0	0	0	0	0	0	0.0038
GM37100	0	0	0	0	0	0	0	0	0	0	0	0	0	0	0	0	0	0
GM15670	0	0	0	0	0	0	0	0	0	0	0	0	0	0	0	0	0	0
GM25542	0	0	0	0	0	0	0	0	0	0	0	0	0	0	0	0	0	0
GM19335	0	0	0	0	0	0	0	0	0	0	0	0	0	0	0	0	0	0
GM37735	0	0	0	0	0	0	0	0	0	0	0	0	0	0	0	0	0	0
GM37769	0	0	0	0	0	0	0	0	0	0	0	0	0	0	0	0	0	0
GM37061	0	0	0	0	0	0	0	0	0	0	0	0	0	0	0	0	0	0
GM16076	0	0	0	0	0	0	0	0	0	0	0	0	0	0	0	0	0	0
GM8840	0	0	0	0	0	0.1333	0	0	0.1648	0	0	0	0	0	0	0.1252	0	0
PCED1C-PS	0	0	0	0	0	0	0	0	0	0	0	0	0	0	0	0	0	0
GM28497	0	0	0	0	0	0	0	0	0	0	0	0	0	0	0	0	0	0
GM29113	0	0	0	0	0	0	0	0	0	0.0402	0	0	0	0	0	0	0	0
GM29114	0.0392	0	0.0192	0	0.0189	0	0	0	0	0	0.0257	0.0506	0	0	0	0	0	0
IKZF2	1.0379	0.9895	1.1367	0.2876	0.327	0.359	0.3112	0.3576	0.4491	0.6301	0.9538	0.6827	0	0.0037	0.0121	0.0083	0.0045	0.004
GM29112	0	0	0.0138	0	0	0	0	0	0	0	0	0	0	0	0	0	0	0
GM28112	0	0	0.0771	0	0	0	0	0	0	0	0	0	0	0	0	0	0	0
GM37930	0	0	0	0	0	0	0	0	0	0	0	0	0	0	0	0	0	0
SPAG16	0	0	0	0.0059	0	0.0228	0	0	0	0	0	0	0	0	0	0	0	0
GM22665	0	0	0	0	0	0	0	0	0	0	0	0	0	0	0	0	0	0
GM23879	0	0	0	0.3193	0	0	0	0	0	0	0	0	0	0	0	0	0	0
GM28580	0	0	0	0	0	0	0	0	0	0	0	0	0	0	0	0	0	0
GM38272	0	0	0	0	0	0	0	0	0	0	0	0	0	0	0	0	0	0
GM37456	0	0	0	0	0	0	0	0	0	0	0	0	0	0.0148	0.008	0	0.0089	0.0161
GM23422	0	0	0	0	0	0	0	0	0	0	0	0	0	0	0	0	0	0
VWC2L	0	0	0.0063	0	0	0	0	0	0	0	0	0	0	0.0056	0	0	0	0
BARD1	6.6246	8.3594	5.8744	5.681	6.6519	7.1583	12.6294	11.37	12.1729	10.0762	9.559	9.4035	4.9253	4.2026	4.0185	3.3038	3.368	3.479
GM16236	0.1298	0.425	0.1271	0.2123	0	0	0.1766	0	0	0.1821	0	0	0.2369	0.2274	0	0	0.137	0.371
GM8870	0	0	0	0	0	0	0	0	0	0	0	0.0818	0	0	0	0	0	0
ABCA12	0.0033	0	0.0033	0	0.0064	0	0.0045	0	0.0043	0	0	0	0.0182	0.0029	0.0095	0.0098	0.007	0.0032
GM6947	0.6307	0	0	1.0317	0	0	0	0	0	0.885	1.6512	0	0	0	0	0.6194	0	0
ATIC	69.5294	73.432	68.2583	64.2624	67.5566	74.1627	33.489	32.432	34.221	66.9924	66.1156	63.1003	73.1226	61.9043	61.4896	53.7193	52.7596	52.4882
FN1	22.0157	28.8398	19.6053	4.0564	5.1836	6.1978	10.6292	10.1654	11.5673	7.9696	12.1245	14.6447	62.9708	44.4927	47.1459	131.437	101.209	119.37
APOL7D	0.1647	0.1284	0.1613	0.1732	0.1135	0.1231	0.6721	0.4584	0.1825	0.2311	0.4004	0.4247	0.4722	0.2267	0.2247	0.7162	0.4719	0.538
GM5829	0	0	0	0	0.1352	0	0	0	0.1812	0	0	0.7228	0	0.1227	0.1339	0.1376	0.2959	0.1335
GM5256	0.1683	0.1837	0.1099	0.1376	0.1624	0.1174	0.0763	0.0729	0.0725	0	0.5874	0.2893	0.3071	0.6386	0.2143	0.2754	0.2369	0.1069
GM37217	0	0	0	0	0	0	0	0	0	0	0	0	0	0	0	0.0137	0	0
GM8883	0	0	0	0	0.0924	0.0334	0.0434	0	0	0	0	0	1.4272	1.8453	1.9819	0.533	0.9436	0.8213
GM28818	0	0.0525	0.0314	0	0.0155	0.0168	0.0436	0.1042	0.0415	0.0225	0.189	0.1034	1.2878	1.2643	1.9456	1.5437	2.032	1.9411
4933417E11RIK	0	0	0	0	0	0	0.1225	0	0.0582	0.1263	0.0589	0	0.3285	0.1183	0.129	0.221	0.1901	0.5146
4930556G22RIK	0	0	0	0	0	0	0	0	0	0	0.1738	0	0	0	0	0	0	0
GM5528	0	0.1119	0.1004	0.0838	0.0989	0	0.1394	0.1331	0	0.1438	0.1342	0	0.187	0.0898	0	0.2013	0.2164	0.0977
GM8885	1.5631	2.2448	1.4502	4.0371	2.6989	3.3569	2.1262	1.8164	1.8082	2.0779	1.0769	1.3788	3.7528	2.7378	3.5357	3.0699	2.3448	2.2732
GM4319	0.024	0	0	0	0.0232	0.1005	0	0	0	0	0.0629	0.0619	0.0877	0.0421	0.1377	0.0944	0.0761	0.0916
MREG	3.0371	3.5969	3.4805	1.2684	1.4964	1.262	2.4025	2.1541	2.2001	1.5414	1.7481	1.6662	22.7953	24.2019	24.2537	42.5995	42.6565	47.5532
GM25360	1173.78	1115.52	1127.27	1046.78	905.642	882.576	1047.94	930.671	880.172	1502.46	1188.49	1529.53	949.36	930.259	920.269	680.647	774.381	561.53
D230017M19RIK	0.5625	0.4831	0.6592	0.4676	0.5517	0.4052	0.715	0.5629	0.5723	0.4529	0.7001	0.4518	0.7908	0.7026	0.9159	1.2587	1.4407	1.151
GM23472	123.38	106.829	147.058	129.978	111.838	94.0516	119.824	142.846	121.885	151.077	139.922	161.72	110.21	120.23	119.062	98.8974	123.716	106.023
GM24497	181.335	159.119	175.561	167.687	144.396	141.482	137.342	139.5	117.556	279.745	243.43	294.217	142.639	166.698	154.485	120.903	138.399	113.877
GM25939	1989.79	1693.24	1981.87	1783.04	1537.65	1536.63	3328.8	2938.2	2668.49	3190.68	2608.28	3239.04	1535.9	1674.87	1619.39	1847.94	2250.27	1922.9
PECR	6.5878	8.0402	7.2776	9.369	9.7694	8.59	8.9608	8.8089	9.0627	5.2822	6.4143	6.4012	12.405	12.3626	12.5521	15.7105	17.06	16.8209
TMEM169	0.596	0.6154	0.489	0.2371	0.1865	0.3539	0.8327	0.816	0.8123	0.5425	0.7591	0.893	0.5144	0.7618	0.6769	0.87	0.9013	1.1665
XRCC5	21.1809	21.8985	21.2701	71.7484	73.0152	78.7094	47.8257	45.7649	42.5456	31.9091	33.4717	28.2252	32.2702	28.7678	31.2437	31.5956	32.5423	32.6572
2022-03-04	0	0.0118	0	0	0	0.0113	0.147	0.2386	0.2934	0.0455	0.1414	0.0557	0.1282	0.1136	0.1445	0.1167	0.1027	0.0824
GM15843	0.279	0.3045	0.0911	0.1521	0.4487	0.3892	0.253	0.4831	0.481	0	0.3652	0.1199	0.1697	0.2443	0.1776	0.274	0.1963	0.3544
SMARCAL1	9.8515	10.2835	9.0755	7.8394	8.4944	8.7614	8.1079	8.0539	8.6838	8.3037	9.4888	9.3345	6.3705	5.9722	5.8813	6.5027	5.7301	5.9495
GM39662	0	0	0	0	0	0	0	0	0	0	0	0	0	0	0	0	0	0
ANKAR	0.0107	0	0	0	0	0.0112	0	0	0	0.015	0	0	0	0	0	0	0	0
GM18035	0	0	0	0	0	0	0	0	0	0	0	0	0	0	0	0	0	0
GM45859	0	0	0	0	0	0	0	0	0	0	0	0	0	0	0	0	0	0
RPL37A	1245.11	1208	1218.06	1206.92	1230.23	1193.79	1480.96	1440.19	1566.67	1221.59	1146.28	1103.66	1024.13	1079.8	1054.07	1137.66	1105.15	1100.19
IGFBP2	0	0	0.0261	0	0.0514	0	0	0	0	0	0	0	0.0243	0	0	0.0262	0	0
IGFBP5	0.0082	0	0	0	0	0	0	0	0.0106	0	0	0.0106	0	0	0	0.0402	0.0173	0.0078
1700027A15RIK	0	0	0	0	0	0	0	0	0	0	0	0	0	0	0	0	0	0
TNP1	0	0	0	0	0	0	0	0	0	0	0	0	0	0	0	0	0	0
GM38106	0	0	0	0	0	0	0.0264	0	0	0	0	0	0	0	0	0	0	0
GM29185	0	0	0	0	0	0	0	0	0	0	0	0	0	0	0	0	0	0
GM29184	0	0	0	0	0	0	0	0	0	0	0	0	0	0	0	0	0	0
PINC	0	0	0	0	0	0	0	0	0	0	0	0	0	0	0	0	0	0.0181
GM27315	0	0	0	0	0	0	0	0	0	0	0	0	0	0	0	0	0	0
D530049I02RIK	0	0	0	0	0	0	0	0	0	0	0	0	0	0	0	0	0	0
GM9553	0	0	0	0	0	0	0	0	0	0	0	0	0	0	0	0.097	0	0.1412
C530043A13RIK	0	0	0	0	0	0	0	0	0	0	0	0	0	0	0	0	0	0
GM29186	0	0	0	0	0	0	0	0	0	0	0	0	0	0	0	0	0	0.071
6030407O03RIK	0.0806	0.1319	0.0986	0	0	0	0	0	0	0	0	0	0	0	0	0	0	0
GM29183	0	0	0	0	0	0	0	0	0	0	0	0	0	0	0	0	0	0
MIR6351	0	0	0	0	0	0	0	0	0	0	0	0	0	0	0	0	0	0
TNS1	3.8872	3.9207	3.7014	0.0779	0.0652	0.0675	1.4713	1.341	1.6011	1.4229	2.4818	2.2146	0.171	0.1265	0.1086	0.169	0.1492	0.0761
RUFY4	0.9083	1.0605	0.6413	0	0.0204	0	1.4079	1.07	1.7752	0.0593	0.1936	0.1634	0	0	0.0202	0	0	0
CXCR2	0.0646	0.0705	0.0158	0	0	0.0169	0.022	0	0.0209	0	0.0423	0.0624	0	0	0.0154	0.0158	0.017	0.0154
CXCR1	0.132	0.2161	0.0323	0.027	0.0318	0	0	0	0	0	0	0	0	0	0	0	0	0
MIR1928	0.7343	0	0	0	0	0	0	0	0	0	0	0	0	0	0	0	0	0
GM25524	0	0	0	0	0	0	0	0	0	0	0	0	0	0	0	0	0	0
ARPC2	143.527	150.363	148.872	117.167	124.755	124.035	180.383	173.333	162.725	177.319	206.782	179.421	120.012	104.669	112.159	114.824	120.548	118.493
GPBAR1	0.0915	0.1498	0.0896	0.1123	0	0.0958	0.3735	0.4755	0.2958	0.7706	0.8986	1.062	0	0.0802	0	0.0449	0.0483	0.1744
AAMP	78.1923	75.947	74.7476	57.853	56.2959	57.6645	53.5665	51.1832	57.0585	44.3382	63.5597	61.0049	44.6365	45.1774	43.4932	48.8693	45.7009	42.511
GM28364	0	0	0	0	0	0	0	0	0	0	0	0	0	0	0	0	0	0
PNKD	8.5178	8.7207	7.9047	4.5877	4.3881	4.9488	3.4348	3.3612	3.5328	1.8334	2.4503	3.0045	3.0717	3.2676	2.9096	3.4789	3.0502	2.8729
GM37503	0.4627	0.3366	1.8124	0.2523	0.744	0.4841	1.4684	0.6009	0.5982	0.4328	0.6056	0.7953	1.1256	0.4052	0.8837	0.6058	0.4884	0.4408
TMBIM1	11.9622	12.0718	11.1055	6.3125	6.7835	7.0221	13.2052	13.5474	13.5263	11.43	12.2243	11.7894	7.8711	8.0049	7.8834	6.6251	5.9445	6.0433
GM29358	0	0	0	0	0	0	0	0	0	0	0	0	0	0	0	0	0	0
GM37931	0.0172	0	0.0841	0.014	0.0331	0.018	0	0.0223	0.0666	0.0241	0.0225	0	0.0157	0.0301	0.0656	0.0169	0	0.0491
CATIP	0.0223	0	0.0218	0	0.0429	0	0.1211	0.0578	0.1438	0.0312	0	0.1147	0.0203	0.1364	0.1275	0.5681	0.7282	0.5088
SLC11A1	0.0398	0.029	0.026	0.0326	0.1025	0.125	0.1445	0.138	0.2403	0	0.0174	0	0.8601	1.0698	1.154	0.9519	1.1494	0.873
CTDSP1	21.5884	22.3865	20.043	15.7735	15.6902	17.9397	9.494	9.0267	9.4246	11.5538	15.2013	15.048	14.6604	12.1473	12.8807	11.3024	10.2652	8.7312
MIR26B	7.5243	5.0537	2.2672	3.787	1.6754	4.8445	4.7237	1.5034	1.4966	2.4364	3.7881	2.9848	1.0561	2.5344	2.2111	5.1152	1.8329	2.2059
VIL1	0.097	0.0756	0.1628	0.2719	0.2139	0.1015	0.1885	0.072	0.0537	0.0972	0.1088	0.0893	0.0126	0	0.0662	0.0544	0.0731	0.066
USP37	11.2105	12.0707	11.6522	11.173	12.6202	14.6599	7.6516	7.0233	7.7148	11.4629	13.2503	11.6938	6.5374	6.116	6.5638	5.2884	5.2679	5.3513
GM37733	0.0332	0.1088	0.2115	0.0543	0.0801	0.2433	0.0452	0.1294	0	0	0.0435	0.1285	0	0.0436	0.0952	0.0489	0.1052	0.0633
CNOT9	46.0084	50.0746	47.7377	46.294	50.3228	52.1988	31.0809	27.9064	28.6447	37.1867	49.1652	44.2954	34.3721	30.4495	30.8117	27.6908	27.4871	26.1212
PLCD4	0.1187	0.0305	0.041	0.0457	0.0539	0.0731	0.0285	0.0453	0.0451	0.049	0.0548	0.063	0.0191	0.0306	0.0267	0.0206	0.0295	0.02
ZFP142	1.5944	1.8442	1.5317	1.5166	1.576	2.0897	1.491	1.3505	1.4396	1.5199	2.4273	2.5303	1.6167	1.2483	1.1462	0.8722	0.8095	0.8091
GM25035	0	1.3947	0.6257	1.0451	0	4.0108	3.4763	0.8298	0.8261	0	0	0.8237	0	0.5595	0	0.6274	0	1.2176
BCS1L	21.0076	20.9197	20.6824	19.4207	20.1831	21.0633	7.2048	7.8121	8.4151	5.9207	8.7842	8.9699	13.9236	14.25	15.2402	17.4332	16.8215	15.1192
RNF25	25.0611	26.343	24.9397	13.4859	12.9066	13.169	14.9732	16.3475	16.1277	15.5727	18.0999	16.489	10.4336	10.134	10.9438	13.5783	13.0489	12.5948
STK36	0.1758	0.1668	0.2844	0.1188	0.1032	0.1759	0.603	0.5162	0.4941	0.2574	0.6703	0.8178	0.3556	0.2543	0.4015	0.3602	0.2743	0.2694
TTLL4	7.691	7.4625	7.1931	4.7158	5.0199	5.3049	7.5413	7.2116	8.4261	8.9712	12.7377	11.3239	6.7595	5.6551	6.2323	4.7778	4.4513	4.4692
CYP27A1	1.4716	1.7544	2.0176	1.6109	1.3107	1.7765	0.0308	0	0	0	0	0	0.0207	0	0	0.0222	0.0239	0.0216
PRKAG3	0.0534	0.0146	0.0523	0.0874	0.0129	0.014	0	0.0347	0	0	0	0	0.0366	0	0	0.0262	0.0705	0.0382
GM27507	0	0	0	0	0	0	0	0	0	0	0	0	0	0	0	0	0	0
WNT6	1.7282	1.3718	1.3188	0.2386	0.3898	0.3522	0	0	0	0	0	0	0	0	0	0	0	0
GM29539	0	0	0	0.0531	0	0	0	0	0	0	0	0	0	0	0	0	0	0
WNT10A	1.0964	0.892	0.7418	0.5054	0.3462	0.5214	0	0	0.0515	0	0	0	0.3092	0.3841	0.3046	0.3132	0.2104	0.3419
GM16582	0	0	0	0	0	0	0	0	0	0	0	0	0	0	0	0	0	0
CDK5R2	0	0	0	0	0	0	0	0	0	0	0	0	0	0	0	0	0	0
FEV	0	0	0	0	0	0	0	0	0	0	0	0	0	0	0	0	0	0
CRYBA2	0	0	0	0	0	0	0	0	0	0	0	0	0	0	0	0	0	0
MIR375	0	0	0	0	0	0	0	0	0	0	0	0	0	0	0	0	0	0
CFAP65	0.0126	0	0	0	0	0	0	0	0	0	0	0	0	0	0	0	0	0
GM15841	0	0	0	0	0	0	0	0	0	0	0	0	0	0	0	0	0	0
IHH	0.0807	0.0705	0.0474	0.0264	0	0.0169	0	0	0.0417	0	0.0845	0	0.0295	0	0.0925	0	0	0
GM37744	0	0	0	0	0	0	0	0	0	0	0	0	0	0	0	0	0	0
NHEJ1	3.7844	3.5541	2.7149	3.527	3.1844	4.0055	1.7358	1.7717	1.593	3.9518	3.7441	3.1202	3.9744	3.7381	3.236	1.7285	1.3471	0.8805
SLC23A3	0.0681	0.0743	0.1556	0.1857	0.0219	0.0238	0.2162	0.3538	0.2055	0.1274	0.1486	0.322	0.3107	0.1591	0.2819	0.1783	0.2636	0.2163
CNPPD1	11.7602	10.3675	10.1316	7.0262	7.2952	7.2253	11.9232	11.3618	13.6244	8.7838	10.6739	10.8393	7.6624	8.1046	7.1124	7.2187	6.4514	6.472
RETREG2	75.2807	76.5416	69.9462	49.883	51.0939	55.0766	42.5526	36.9867	42.2278	28.497	39.5534	38.1529	19.0817	20.0696	19.286	25.5487	24.8845	22.0391
ZFAND2B	8.3291	7.3331	8.1022	6.4487	7.0186	7.1457	8.9125	9.1228	9.7636	5.9995	9.5216	9.3779	9.5237	10.1146	10.4205	12.8137	12.0748	11.9306
ABCB6	6.6183	6.1626	5.9373	5.4279	5.7338	6.2367	1.8508	2.0317	1.9507	1.091	1.357	1.2888	2.2885	2.367	2.0597	1.2907	1.1628	1.2171
GM29253	0.0094	0.0103	0.0368	0.0154	0.0272	0.0295	0.0384	0.0366	0	0	0.0123	0.0121	0.0686	0.0247	0.0359	0.0185	0.0099	0.0179
ATG9A	5.1144	5.0881	4.7744	2.6117	3.1965	3.2427	3.6235	2.9054	3.4994	4.6605	6.2364	5.812	4.1362	3.6788	4.1261	3.3705	2.7129	2.7823
ANKZF1	4.8413	4.626	4.8347	4.8672	4.302	4.6147	6.4551	6.6232	6.284	7.5987	8.8544	8.7578	6.3545	6.6361	7.1273	6.7458	6.9285	6.9284
GLB1L	0.4249	0.3637	0.3508	0.4293	0.4341	0.4794	0.374	0.6168	0.3662	0.6781	0.6325	0.6659	0.2736	0.27	0.3103	0.2618	0.2902	0.1985
GM27943	0	0	0	0	0	0	0	0	0	0	0	0	0	0	0	0	0	0
STK16	21.8328	22.7356	22.1164	16.9477	17.252	15.608	14.9302	14.9769	16.1481	21.483	25.4712	24.3428	13.7491	12.8738	13.9146	12.1899	10.5637	10.6036
TUBA4A	0.2393	0.4062	0.4686	1.0002	1.2698	1.3212	0.1447	0.0863	0.2062	0.0933	0.1566	0.1885	57.8714	56.4251	54.653	17.0085	15.211	15.2876
A630095N17RIK	0.0438	0.0478	0	0.0358	0	0.0917	0	0.2845	0.3965	0	0	0	0.5196	0.5755	0.4602	0	0.185	0.0835
DNAJB2	10.6407	10.8806	11.0326	6.9696	7.0383	7.656	5.9375	6.6317	6.8861	4.8253	7.6992	8.0309	5.4823	5.4857	5.0092	10.4944	9.2891	9.9069
PTPRN	2.3968	2.9697	2.177	0.5492	0.3575	0.424	11.2766	11.3385	13.9219	6.5962	10.4728	11.0462	2.5563	2.7378	2.5101	2.8538	2.5912	2.2837
GM28294	0	0	0	0.1042	0	0	0	0	0	0.1788	0	0	0	0	0	0.2503	0	0.2429
RESP18	0	0	0	0.039	0	0	0	0.1238	0.0616	0	0.0624	0	0.087	0	0	0	0	0
GM28902	0	0	0	0	0	0	0	0	0	0	0	0	0	0	0	0	0	0
DNPEP	24.8338	25.1138	25.3192	18.0215	15.7825	16.4654	46.168	45.0652	47.9164	40.0773	50.5693	48.6527	18.8783	20.7435	21.4933	27.9117	25.3311	24.5473
DES	1.5988	0.8868	1.6684	0.2572	0.1644	0.192	0.6596	0.5106	0.6269	0.1287	0.223	0.2027	2.439	1.9281	2.0526	3.1915	3.085	2.9719
GM15179	0	0.0619	0	0	0	0	0	0	0	0	0	0	0	0.0497	0	0.0557	0	0
SPEG	0.8379	0.7881	0.7903	0.3126	0.2832	0.2949	0.1891	0.1805	0.2346	0.0488	0.0859	0.0747	1.4478	1.5183	1.405	2.0855	1.6101	1.6446
GM15178	0	0	0	0	0	0	0	0	0	0	0	0	0.3804	0.2738	0.2986	0.2047	0.11	0.2979
GMPPA	17.8918	18.5636	16.7166	21.689	22.1787	21.728	20.928	20.3026	22.7072	8.013	11.4007	10.9373	24.1376	26.3902	26.6805	33.7064	31.1818	33.1166
ASIC4	0.1624	0.0985	0.212	0.0148	0.0348	0.0755	0	0	0.0233	0.0253	0	0	0	0.0158	0	0.0531	0	0
GM37264	0	0	0	0	0.0217	0	0	0.0583	0	0	0	0	0	0	0	0	0	0
CHPF	66.1919	74.444	63.2966	34.7999	38.0517	44.2374	25.1468	22.9998	28.4878	41.0508	43.7557	44.691	27.8308	26.4919	24.6867	19.0937	15.0306	14.6123
OBSL1	20.7783	21.7141	18.254	6.3156	6.4361	6.6567	6.1569	5.7957	7.5198	11.765	13.2796	12.1054	5.6667	5.1445	4.6835	5.6202	4.7168	4.656
TMEM198	0.5305	0.5575	0.5965	0.3053	0.3602	0.2878	0.3207	0.1276	0.3556	0.4411	0.5144	0.4053	0.3585	0.4646	0.2252	0.0386	0.2904	0.1685
INHA	0.9339	1.1649	0.8492	0.1091	0.0322	0.0698	2.1323	1.8194	2.2855	1.7785	2.8379	2.193	0.1826	0.2629	0.1274	0.4913	0.3873	0.2225
GM15181	0	0.3034	0	0	0	0	0	0	0	0	0	0	0	0	0	0	0	0.5297
STK11IP	3.8378	4.2822	3.9764	3.5661	4.0419	4.553	1.643	1.6911	1.9936	2.5122	3.0612	3.1807	3.4309	3.4734	3.1825	2.7507	2.5501	2.4242
GM15183	0	0	0	0	0	0	0	0	0	0	0	0	0	0	0	0	0	0
SLC4A3	3.8161	4.0214	3.7371	1.0949	1.2255	1.1074	1.4708	1.5604	2.0268	1.4772	1.715	1.9546	0.7882	0.8918	1.0436	1.0056	0.8999	0.9049
GM15180	0	0	0	0	0	0	0	0	0	0	0	0	0	0	0	0	0	0
GM15182	0	0	0	0	0	0	0	0	0	0	0	0	0	0	0	0	0	0
GM5257	0.0623	0	0	0	0	0	0	0	0	0	0.0815	0.0803	0	0	0	0	0	0
GM29065	0	0	0	0	0	0	0	0	0	0	0	0	0	0	0	0	0	0
GM29068	0	0	0	0	0	0	0	0	0	0	0	0	0	0	0	0	0	0
GM29069	0	0	0	0	0	0	0	0	0	0	0	0	0	0	0	0	0	0
GM17751	0	0	0	0	0	0	0	0	0	0	0	0	0	0	0	0	0	0
MIR6343	0	0	0	0	0	0	0	0	0	0	0	0	0	0	0	0	0	0
GM816	0	0	0	0	0	0	0	0	0	0	0	0	0	0	0	0.0787	0.0846	0.0382
GM38265	0	0	0	0	0	0	0	0	0	0	0	0	0	0	0	0	0	0
EPHA4	0	0.02	0	0	0	0.0064	0	0	0	0	0	0	0	0	0	0	0.0129	0
MIR6352	0	0	0	0	0	0	0	0	0	0	0	0	0	0	0	0	0	0
GM28386	0	0	0	0	0	0	0	0	0	0	0	0	0	0	0	0	0	0
GM28385	0	0	0	0	0	0	0	0	0	0	0	0	0	0	0	0	0	0
GM26263	0	0	0	0	0	0	0	0	0	0	0	0	0	0	0	0	0	0
GM28387	0	0	0	0	0	0	0	0	0	0	0	0	0.0526	0	0.055	0	0	0
PAX3	0.3896	0.3211	0.4984	1.7494	1.849	1.9634	0	0	0	0	0	0	0.2249	0.2785	0.3721	0.164	0.277	0.2728
SGPP2	0.1475	0.0537	0.1445	0.191	0.1661	0.1415	0.0836	0.0639	0.1272	0.0862	0.1126	0.1902	0.2131	0.0646	0.0822	0.0121	0.0649	0.0351
GM28410	0	0	0	0	0	0	0	0	0	0	0	0	0	0	0	0	0	0
GM37884	0	0	0	0	0	0	0	0	0	0	0	0	0	0	0.0574	0	0	0
FARSB	110.356	114.585	110.038	115.365	114.488	125.577	40.407	40.2885	39.1352	70.3501	73.0988	64.2491	50.9989	42.9198	45.9808	58.2676	58.6929	59.078
GM28995	0	0	0	0.1542	0.1819	0	0.2564	0	0	0	0	0	0.5159	0	0	0	0	0.7184
4833412K13RIK	0.3326	0.2541	0.1629	0.1904	0.2889	0.3132	0	0.0432	0	0.14	0	0.0858	0.0607	0.0874	0.2541	0.0653	0.1405	0.1585
BC035947	0	0	0	0	0	0	0	0	0.0192	0	0	0	0	0	0	0	0.0157	0
MOGAT1	0.0947	0.2068	0.2165	0.1291	0.1828	0.1652	0.0859	0.041	0	0.0443	0	0	0.1152	0.083	0.0302	0.2171	0.1333	0.0903
5730419F03RIK	0	0	0	0	0	0.0246	0.064	0	0.0304	0	0	0.0606	0	0	0	0	0	0
GM29611	0	0	0	0	0	0	0	0	0	0	0	0	0	0	0	0	0	0
ACSL3	52.4155	54.8786	56.8255	62.2986	66.459	68.2715	49.1336	47.2216	40.7597	50.8754	53.3717	43.9775	44.4814	39.5837	44.2244	57.702	60.2654	56.2684
UTP14B	2.5819	3.0907	2.9174	3.4687	3.8697	4.3838	2.658	2.255	2.6423	2.679	3.4216	2.9239	5.6579	4.6288	5.3232	5.8131	5.9244	5.6283
GM6159	0.2568	0.2492	0.2795	0.4201	0.4405	0.2687	0.1553	0.3336	0.2214	0.2002	0.3362	0.5886	0.2343	0.2499	0.4088	0.3643	0.241	0.136
GM29536	0	0	0	0	0	0	0	0	0	0.021	0	0	0	0	0	0	0.0158	0.0143
KCNE4	0.1666	0.2021	0.4533	0	0.0179	0.0387	0	0	0.0239	0.052	0	0	0	0.0649	0	0.6	0.5668	0.5116
GM29187	0	0	0	0	0	0	0	0	0	0	0	0	0	0	0	0.1402	0.2261	0.068
GM5830	1.4437	0.3636	0.435	0.3633	0.5358	0	0.1511	0	0.4307	0.3117	0.2907	0.1432	0.1013	0.0973	0.4242	0.1091	0.4689	0.2116
SCG2	0.0587	0.0427	0.0383	0.064	0.1699	0.1023	0.2395	0.1778	0.2529	0	0.0256	0	0	0	0	2.478	2.9116	2.013
GM19027	0	0	0	0	0	0	0	0	0.0469	0	0	0	0	0	0	0	0	0
GM24160	0	0	0	0	0	0	0	0	0	0	0	0	0	0	0	0	0	0
AP1S3	0.6325	0.6903	0.6361	0.1118	0.1979	0.1073	0.558	0.4218	0.6409	0.3838	0.537	0.595	0	0	0	0.0168	0	0
GM37886	0	0	0	0	0	0	0.0442	0	0	0.0456	0	0	0	0	0	0	0	0
WDFY1	7.4008	8.6651	7.8639	7.7955	8.0115	8.3222	2.6817	2.5803	2.9803	1.1598	1.1514	1.2513	3.708	3.2539	3.8382	8.9875	8.5729	8.2076
GM10555	0	0	0	0	0	0.0287	0	0	0.0355	0.0385	0.036	0	0.0501	0	0	0	0	0
MRPL44	58.2049	59.4439	58.7577	50.9319	51.3094	50.8149	27.2318	25.8071	24.8392	36.28	38.7405	36.8442	26.7005	25.4208	27.2651	30.7671	31.4634	30.0816
SERPINE2	20.345	20.7279	20.9759	0.034	0.0458	0.0559	0	0	0.0307	0	0	0	0.0054	0	0.0057	0.07	0.0376	0
GM5529	1.9878	1.8682	1.7844	1.6709	1.1721	1.502	0.9764	2.0079	0.9994	1.7045	2.7465	2.3491	2.7202	2.8529	2.6367	1.1386	1.3406	1.3679
GM28071	0.1029	0	0.1008	0.0842	0	0	0	0	0.2661	0	0	0	0.1878	0	0	0	0	0
GM28058	0	0	0	0	0	0	0	0	0	0	0	0	0	0	0	0	0	0
GM23934	0.9196	0	1.3508	0	0	0.4811	2.5017	1.7915	4.7556	2.5807	1.2037	0.5928	0.8389	0.4027	2.1956	0.903	0.4854	0.8762
GM38339	0	0	0	0	0	0	0	0	0	0	0	0	0	0	0	0	0	0
9830004L10RIK	0	0	0	0	0	0	0	0	0	0	0	0	0	0	0	0	0	0
FAM124B	0	0	0	0	0	0	0	0	0	0	0	0	0	0	0	0	0	0
2310015K22RIK	0	0	0	0	0	0	0	0	0	0	0	0	0	0	0	0	0	0
GM37932	0	0.046	0	0	0	0	0.0573	0	0	0.0592	0	0.0543	0	0	0	0.0414	0	0
CUL3	44.4523	47.5689	47.3776	40.4511	44.9657	49.4654	47.158	43.0605	44.0927	64.0886	69.9085	57.8292	39.8541	31.8203	33.1682	28.8396	30.8852	29.9841
GM37902	0.38	0.2871	0.3721	0.2391	0.1692	0.2753	0.159	0.1519	0.1512	0.4102	0.6122	0.2261	0.2934	0.2048	0.2513	0.1722	0.1851	0.1671
GM37262	0.0541	0	0.0265	0.0885	0.0261	0.0849	0.1104	0.0351	0.035	0.038	0.1063	0.1744	0.0988	0.0237	0.1292	0.0797	0.1143	0.0774
GM29125	0	0.0167	0	0	0	0	0.0416	0	0	0	0	0	0	0	0	0.045	0	0.0291
GM6189	0	0	0	0	0	0	0	0	0	0	0	0	0	0	0	0	0	0
1700016L21RIK	0	0	0	0	0	0	0	0	0	0	0	0	0	0	0	0	0.0537	0
GM45261	0	0	0	0	0	0	0	0	0	0	0	0	0	0	0	0	0	0
DOCK10	3.9429	4.5738	4.2226	0.1189	0.1351	0.1578	0.0037	0.007	0.0104	0	0	0	0	0.0024	0.0026	0.0079	0.0028	0
GM37645	0	0.0151	0.0135	0	0	0	0	0	0	0	0	0	0	0	0	0	0	0
GM38062	0	0	0	0	0	0	0	0	0	0	0	0	0	0	0	0	0	0
A630081D01RIK	0	0	0	0	0	0	0	0	0	0	0	0	0	0	0	0	0	0
GM29124	0	0	0	0	0	0	0	0.1414	0	0	0	0	0	0	0	0	0	0
GM28066	0	0	0	0	0	0	0	0	0	0	0	0	0	0	0	0	0	0
NYAP2	0.0157	0.0258	0.0193	0	0	0	0.1391	0.092	0.0915	0.0055	0.0051	0.0051	0	0	0	0.0039	0	0
GM37210	0	0	0	0	0	0	0	0	0	0	0	0	0	0	0	0	0	0
GM6198	0	0	0	0	0	0	0	0	0	0	0	0	0	0	0	0	0	0
GM5530	0.7492	0.1635	0.3424	0.0817	0.0482	0.1045	0.4076	0.3892	0.3875	0.841	0.3269	0.2576	0.1823	0.175	0.2862	0.1471	0.2109	0.2855
GM7516	0.2091	0.2282	0.1365	0.4559	0.2017	0	0.5687	0.4525	0.5406	0.6845	0.7297	1.0781	0.5086	0.4272	0.4659	0.479	0.4414	0.5976
GM37114	0	0.0298	0	0	0	0	0	0	0	0	0	0	0	0	0	0	0	0
MIR6344	0	0	0	0	0	0	0	0	0	0	0	0	0	0	0	0	0	0
IRS1	7.7476	9.7303	5.8642	2.5698	2.8241	3.7208	6.5792	5.7509	6.3579	5.4432	13.0429	13.6993	5.7478	5.4279	5.3387	5.8803	4.9412	5.0803
GM9747	0	0	0	0	0	0	0	0	0	0	0	0	0	0	0	0	0	0
RHBDD1	10.0288	10.8069	10.3397	7.844	8.4362	8.6748	13.1034	13.1351	12.6282	4.8955	5.7409	5.6452	8.3568	7.8054	7.7769	18.2187	18.0567	20.6521
GM19552	0.0695	0	0.034	0.0568	0.1005	0	0.0709	0.0902	0.0225	0.0244	0.0227	0.0448	0.0158	0.0608	0.0498	0.1023	0.0917	0.1324
GM28940	0	0.0958	0	0.0239	0	0	0.0398	0.038	0.0378	0	0	0.1885	0.0801	0	0.0279	0.1723	0	0.1393
GM22112	0	0	0	0	0.3923	0	0	0	0	0	0	0	0	0	0	0	0	0
COL4A4	0.0325	0.081	0.0318	0.0303	0.0224	0.0243	0.0315	0.0241	0.0779	0.1106	0.0485	0.1315	0.0254	0.0162	0.0266	0.0455	0.0489	0.0442
COL4A3	0.0099	0.0323	0	0	0.0048	0.0103	0	0.0128	0.0191	0.0346	0.0194	0.0382	0.0135	0.0043	0.0141	0.0194	0.0156	0
C430014B12RIK	0.1586	0.0618	0.1331	0.1575	0.2186	0.1304	0.0925	0.1177	0.2343	0.1748	0.2372	0.2045	0.279	0.1091	0.1623	0.1224	0.1674	0.259
MFF	17.0782	18.0453	17.4602	15.9139	16.3274	16.2272	15.7611	16.0574	14.844	16.0324	16.7578	16.3814	11.1598	10.6419	11.0805	11.101	12.6201	11.6746
GM28941	0.2903	0.0528	0.0947	0.1978	0.1867	0.1012	0.3948	0.1257	0.0625	0.2036	0.3799	0.3742	0.1765	0.0847	0.231	0.0475	0.0511	0.2766
TM4SF20	0	0.2136	0.0319	0.0534	0.0944	0	0.0444	0.2119	0.0422	0	0.1281	0.0421	0.0595	0	0.0623	0	0.0344	0.0622
GM19257	0	0	0	0	0	0	0	0	0	0	0.7038	0	0	0	0.2567	0	0	0
GM36999	0	0	0	0	0	0	0	0	0	0	0	0	0	0	0	0.0924	0	0
GM28942	0	0	0	0	0	0.141	0	0	0	0	0	0	0	0	0	0	0	0
GM17764	0.1258	0	0	0	0	0	0	0	0.1627	0	0	0	0	0	0	0	0	0
GM22396	0	0	0	0	0	0	0	0	0	0	0	0	0	0	0	0	0	0
AGFG1	32.2623	33.1242	32.2722	43.7398	46.0367	50.4348	24.2008	22.7263	23.4732	25.3768	27.7746	25.9332	22.0882	19.2451	21.2957	18.2029	18.3911	17.8748
GM7553	0	0	0.0338	0.1129	0.0333	0.1083	0	0.224	0	0	0.0452	0	0.0944	0.0302	0.0329	0.0678	0.0728	0.0329
SLC19A3	0	0	0	0	0.031	0	0	0	0	0	0	0	0	0	0	0	0	0.0153
GM7539	0	0.0852	0.0765	0	0	0.0817	0	0	0	0	0	0	0	0.0684	0	0	0	0
KRTAP28-10	0	0	0	0	0	0	0	0	0	0	0	0	0	0	0	0	0	0
A030005K14RIK	0	0	0	0	0	0	0	0	0	0	0	0	0	0	0	0	0	0
KRTAP28-13	0	0	0	0	0	0	0	0	0	0	0	0	0	0	0	0	0	0
GM29518	0	0	0	0	0	0	0	0	0	0	0	0	0	0	0	0	0	0
CCL20	0.1731	0.529	0.373	0.0283	0	0	0	0.045	0.0448	0	0	0	0.0632	0	0	0.9519	1.2061	1.0556
GM29519	0	0	0	0	0	0	0	0	0	0	0.3236	0	0	0	0	0	0	0
DAW1	0.023	0	0	0	0	0	0	0	0	0	0	0	0	0	0	0	0.0243	0
GM6244	0	0	0	0	0	0	0	0	0	0	0	0	0	0.0512	0	0	0.0618	0
SPHKAP	0	0	0	0	0	0	0.0279	0.0133	0.0199	0	0.0067	0	0	0	0	0	0.0054	0
GM6374	0	0.0681	0	0.0511	0	0	0	0	0.0807	0	0	0	0.2848	0.1094	0.1193	0	0.1318	0.1785
GM37517	0	0	0	0	0	0	0	0	0	0	0	0	0	0	0	0	0	0
GM37989	0	0	0	0	0	0	0	0.0796	0	0	0	0	0	0	0	0	0	0
4933436I20RIK	0.0229	0	0	0	0	0	0.5301	0.4764	0.4446	0.0643	0.03	0.0296	0	0	0	0	0	0
GM25754	0	0	0	0	0	0	0	0	0	0	0	0	0	0	0	0	0	0
GM24555	0	0	0	0	0	0	0	0	0	0	0	0	0	0	0	0	0	0
PID1	0.0482	0.0591	0.0472	0	0	0.0126	1.7524	1.8843	1.7591	1.3009	1.7021	1.8162	0	0.0105	0	0	0	0.0115
GM37058	0	0	0	0	0	0	0	0	0	0.042	0	0	0	0	0	0	0	0
GM18304	0	0.295	0	0	0	0.0943	0	0	0	0	0	0	0.0822	0.0789	0.0861	0	0	0
MIR6353	0	0	0	0	0	0	0	0	0	0	0	0	0	0	0	0	0	0
DNER	0.0206	0	0.0201	0.0168	0	0.0323	0.042	0.0401	0.0399	0.101	0.1615	0.1989	0.1313	0.1801	0.2455	0.0101	0.0217	0.0392
GM37959	0	0	0	0	0	0	0.0231	0	0	0	0.0222	0	0	0	0.0324	0	0	0
GM37925	0	0	0	0	0	0	0	0	0	0	0	0	0	0	0	0	0	0
MIR5126	0	0	0	0	0	0	0	0	0	0	0	0	0	0	0	0	0	0
TRIP12	23.9867	26.3092	23.8237	19.3051	21.7144	25.8773	23.8557	21.527	23.4756	30.5015	32.5732	28.4445	17.2979	12.9193	13.6249	9.7343	9.5008	9.0951
GM38374	0.0968	0.0792	0.0237	0	0.0934	0.0253	0.0987	0.0314	0	0.1019	0.0317	0.0624	0.0662	0.0212	0	0	0	0.0692
GM37738	0.0209	0.0569	0.0613	0.0171	0.0906	0.0655	0.0284	0.0271	0.0539	0.0439	0	0.0941	0.0476	0.0183	0.0498	0.0307	0.1101	0.0596
FBXO36	1.3971	1.5749	1.8616	1.4798	1.9447	1.318	8.3493	7.1987	6.4258	4.9493	6.5657	6.9686	2.2776	2.2264	2.4936	7.6244	7.5918	8.6201
SLC16A14	0.1027	0.016	0.0862	0	0.0142	0	0	0.0572	0.038	0	0	0.0189	0	0.0129	0	0.0144	0.0155	0.014
GM15433	7.7854	8.9191	7.3538	0	0.0533	0.0578	0	0.0717	0.1428	0	0	0.1424	0	0	0.0527	0.0542	0	0.1578
GM29284	1.3505	1.8951	1.7004	0	0	0	0.2624	0	0	0	0	0	0	0	0	0	0	0
C130026I21RIK	1.7869	2.1748	1.901	0.0526	0.0496	0.0538	0.0175	0.1002	0.0166	0.018	0	0	0	0	0	0.0126	0.0407	0.0735
RPL19-PS1	11.8207	11.3569	11.4128	13.3441	11.7267	11.6706	15.0597	13.2981	14.6371	12.6151	11.1143	10.9466	14.8091	14.8717	16.6157	13.3242	13.5326	13.2458
GM27907	0	0	0	0	0	0	0	0	0	0	0	0	0	0	0	0	0	0
GM7582	5.14	5.9662	5.1934	0	0.0787	0	0.111	0	0	0.1145	0	0	0	0	0	0	0.0861	0
GM2389	0	0.2841	0	0	0	0.2723	0	0	0	0.3653	0	0	0	0	0	0	0	0
GM18342	0.2127	0.0774	0.2083	0	0.0684	0	0	0	0	0	0	0	0	0	0	0.0696	0	0
A530032D15RIK	1.1356	1.1389	0.8415	0.2008	0.2369	0.4174	0.167	0.1993	0.2381	0.2584	0.1607	0.1583	0.14	0.0806	0	0.1507	0.0648	0.0877
GM10553	0	0	0.259	0	0	0	0	0	0	0	0	0	0	0	0	0	0	0
A530040E14RIK	6.8406	7.3505	6.533	0.1039	0.0613	0.1329	0.1152	0.0825	0.1917	0	0.0277	0	0.0773	0.0185	0	0.0208	0	0.0202
GM16038	0	0.2782	0	0	0	0	0	0	0	0	0	0	0	0	0	0	0	0
GM2619	18.5456	18.4842	19.3596	0.1053	0	0.0674	0	0.0836	0	0	0	0	0	0	0	0.0632	0	0.1841
GM6264	0.0668	0.0364	0.0327	0.0273	0.0966	0	0.0454	0	0.0432	0.0468	0	0	0	0	0.0319	0.0656	0.0705	0
GM7609	3.1537	3.7002	3.5516	0	0.019	0	0.0804	0.0512	0.0765	0	0	0	0	0.0173	0	0	0.0208	0
GM16028	0.1106	0.1207	0.2707	0	0	0	0	0	0	0	0	0	0	0	0.0528	0	0	0
GM16026	0.086	0.2011	0.1925	0.01	0	0	0	0	0	0	0	0.0158	0	0.0108	0	0	0	0
GM16025	0.2232	0.155	0.2384	0	0	0	0	0	0	0	0	0	0	0	0	0	0	0
GM7281	0	0.0989	0.0887	0	0	0	0	0	0	0	0	0	0	0	0	0	0	0
GM2666	2.3191	1.4463	2.0007	0	0	0	0	0.0717	0	0	0	0	0	0	0	0	0	0
GM2427	0.0558	0.1828	0.1094	0	0	0	0	0	0	0	0.1462	0	0	0	0	0.0548	0	0
GM16092	0.0614	0.0223	0.0801	0	0	0	0	0	0	0	0	0	0	0	0	0	0	0
GM7592	12.8682	13.8735	13.8311	0.0642	0	0	0.1067	0	0	0	0	0	0	0	0	0	0.0828	0.0748
G530012D18RIK	0.1171	0	0	0	0	0	0	0	0	0	0	0	0	0	0	0	0	0
SP110	4.4111	4.0543	4.2701	0.1009	0.091	0.1518	0.0691	0.0377	0.0094	0	0.0475	0.0935	0.053	0.0572	0.0208	0.0855	0.0842	0.1244
GM16094	0	0	0.2257	0	0	0	0	0	0	0	0	0	0	0	0	0	0	0
SP140	5.2479	5.0662	6.1381	0.6771	1.1696	0.8816	2.0711	2.1119	1.7584	0.6845	0.9675	0.972	0.3237	0.1812	0.3388	1.2774	1.3264	1.5776
GM10552	0.5125	0.0508	0.4106	0.0762	0	0	0	0	0	0.3269	0	0.0601	0	0	0.0445	0	0.0492	0
GM17017	0.1432	0.067	0.1603	0	0.0592	0.0214	0	0.0266	0	0	0.0803	0.0264	0	0.0179	0.0195	0	0.0216	0
SP100	9.5842	9.4799	9.3921	0.3142	0.2136	0.4087	0.5225	0.5497	0.564	0.1279	0.1108	0.1595	0.4811	0.4619	0.4539	0.4539	0.4399	0.3846
A630001G21RIK	6.1928	5.8671	6.0468	3.9954	4.1354	4.6171	1.5316	1.5331	0.8453	2.4209	2.187	1.6857	3.9267	3.6898	3.9718	3.0495	3.2782	3.3396
MIR8096	0	0	0	0	0	0	0	0	0	0	0	0	0	0	0	0	0	0
GM25472	0	0	0	0	0	0	0	0	0	0	0	0	0	0	0	0	0	0
9930111H07RIK	0	0	0	0	0	0	0	0	0.0775	0	0	0	0.0547	0.0525	0.0572	0.0588	0.0633	0
GM22906	0	0	0	0	0	0	0	0	0	0	0	0	0	0	0	0	0	0
CAB39	43.497	43.1795	40.2406	27.8875	31.9614	34.0603	36.6038	33.2525	33.3268	43.1442	46.9357	42.3288	28.9644	24.8144	27.154	24.0904	23.4974	23.1896
ITM2C	101.95	94.8024	101.134	88.4846	85.0672	86.3727	109.15	97.8573	110.003	46.9179	53.9018	51.6116	69.3697	76.206	69.7515	164.597	157.031	167.82
4933407L21RIK	0.2796	0.1606	0.1585	0.1324	0.1136	0.154	0	0.0191	0	0	0	0.019	0	0	0	0	0.0155	0.014
GM28884	0.0123	0	0.0483	0.0302	0	0.0129	0	0	0	0	0	0	0	0	0	0	0	0
GPR55	0	0.0144	0.0129	0	0.0128	0.0277	0	0	0	0	0	0	0	0	0	0	0	0
GM28100	0	0	0	0	0	0	0	0	0	0	0	0	0	0	0	0	0	0.1611
GM18180	0.1989	0.0362	0.1623	0.1898	0.2239	0.4509	0.2255	0.2153	0.2572	0.1861	0.5207	0.5129	0.242	0.0871	0.2216	0.0326	0.14	0
SPATA3	0.0241	0.0263	0	0.0394	0.1628	0.0757	0	0	0	0	0	0	0	0	0.023	0	0	0
2810459M11RIK	0.0148	0.0161	0.0145	0.0725	0.0855	0.0773	0	0	0	0	0	0	0.0269	0.0129	0	0.029	0.0312	0
PSMD1	55.6239	60.7317	57.2637	61.8749	63.5427	69.4257	45.9178	45.611	45.1945	57.5257	71.7284	68.8825	46.5388	41.228	42.445	34.6984	36.7359	36.2877
GM22786	28.228	25.9675	32.7771	30.3422	25.291	25.3143	24.6834	15.1883	23.9829	18.1069	12.1406	24.9545	11.7726	14.126	10.3983	21.3833	40.0144	28.433
HTR2B	0.1154	0.0252	0.113	0.2077	0.0668	0.2174	0.1884	0.2099	0.1492	0.162	0.2115	0.0893	0.2106	0.2022	0.1323	0.136	0.195	0.022
GM37914	0.1469	0.1403	0.1798	0.0751	0.0886	0.0769	0.1249	0.0716	0.0712	0.0258	0.024	0.2131	0.0838	0.0643	0.0351	0.0361	0.1551	0.105
GM21972	1.2046	1.1071	1.7384	0.8296	1.4069	1.9236	1.9834	0.5764	0.8197	1.3344	1.9917	1.3078	0.8676	0.7773	0.4238	0.3113	0.6692	0.6041
ARMC9	1.6417	1.8496	1.5929	1.1694	1.292	1.1912	1.3995	1.4001	1.4525	2.0753	2.9312	2.6432	1.4252	1.2389	1.2861	1.8907	1.745	2.0075
GM16341	0.261	0	0	0	0	0	0	0	0	0	0	0.1682	0	0	0	0	0	0
B3GNT7	0	0.013	0.0349	0.0486	0.0344	0.0124	0	0	0	0	0	0	0	0	0.0227	0.0117	0	0.0113
GM28626	0	0	0	0	0	0	0	0	0	0	0	0	0	0	0	0	0	0
GM5258	0	0	0	0	0	0	0	0	0	0	0	0	0	0	0	0	0	0
GM28627	0	0	0	0	0	0	0	0	0	0.1524	0	0	0	0.0951	0	0	0	0
NCL	26.7331	28.5659	26.9738	24.9523	25.999	27.9996	12.8742	12.6876	12.9361	24.6981	30.0055	29.5652	33.7813	26.0671	25.9737	18.2516	17.6425	21.1282
SNORA75	0	0	0	0	0	0	0	0	0	0	0	0	0	0	0	0	0	0
MIR3535	0	0	0.3277	1.916	0.6458	2.4511	2.2762	0.4347	1.7308	0.4696	1.3142	3.4518	1.832	0.8793	0.3196	0.9859	1.4132	1.2755
GM24148	0	0	0	0	0	0	0	0	0	0	0	0	0	0	0	0	0	0
SNORD82	10.5423	6.9037	6.8826	5.1733	6.1032	12.5004	7.6479	12.7792	6.3607	22.6822	16.5594	15.4035	10.259	8.0014	6.7122	6.9015	7.4191	10.0449
C130036L24RIK	0.963	0.9259	0.8982	0.4751	0.5531	0.5038	1.05	0.675	1.1166	1.866	1.7708	1.5962	2.0988	1.506	1.4379	1.2083	1.1779	1.1652
GM45908	0	0	0	0	0	0	0	0	0	0	0	0	0	0	0	0	0	0
NMUR1	0	0.0634	0.0284	0.0475	0.056	0.0911	0	0	0	0	0	0	0	0	0	0	0.0306	0
TEX44	0	0	0	0.0233	0	0	0	0	0	0	0	0	0	0	0	0	0	0
RPL30-PS6	0	0	0	0	0	0	0.1923	0.3672	0	0.3967	0.1851	0	0	0.2476	0	0	0	0
PTMA	2221.79	2272.4	2248.11	2409.48	2508.14	2626.67	1902.81	1731.92	1696.37	2826.94	2978.2	2643.81	2394.34	2232.01	2267.08	1560.64	1572.39	1475.76
PDE6D	15.4052	16.937	16.8558	20.5431	22.3179	20.726	22.6444	21.7093	20.589	23.3596	24.3931	22.9475	10.9426	10.8007	10.9157	13.4639	14.9029	12.1387
GM37152	0.0837	0.1371	0.082	0.137	0.1212	0	0	0.0544	0.1083	0.0588	0.1096	0	0.191	0.11	0.12	0.1645	0.1326	0.1197
COPS7B	9.777	10.8851	9.8628	6.8581	7.4539	7.8119	4.6109	4.9935	5.8936	6.2711	6.831	6.9694	3.8901	4.242	3.919	4.3361	5.5088	4.5899
GM22955	0	0	0	0	0	0	0	0	0	0	0	0	0	0	0	0	0	0
GM37022	0.0218	0	0.1282	0	0	0	0	0	0.0282	0	0	0.0281	0	0	0.0417	0	0	0.0208
NPPC	0.2361	0.1031	0.4161	0.8109	0.9567	0.4446	0.0642	0	0	0	0	0	0	0.0827	0	0	0	0
DIS3L2	4.98	4.8019	5.0392	4.6515	4.3731	5.245	2.9471	2.7135	3.0871	2.8153	3.7621	3.684	2.8742	2.5751	2.766	2.958	2.6781	2.9386
GM29097	0.1166	0	0.2283	0	0.3375	0	0.1586	0	0	0	0	0.1503	0	0	0	0	0.1231	0
GM29055	0	0	0.0563	0.1412	0.1388	0.0602	0.0391	0.0747	0	0	0	0	0	0	0	0	0	0.0822
GM37485	0.0333	0.0182	0.0163	0.0409	0.0964	0.1046	0.0453	0	0.0215	0.2104	0.0436	0.0215	0.152	0.1897	0.1909	0.0491	0.1231	0.0476
GM38142	0	0	0.0271	0	0	0.0145	0	0.018	0.0358	0	0	0	0	0.0121	0.0132	0.0272	0	0
GM38010	0.0177	0	0.0173	0	0.0171	0.0185	0	0	0	0	0	0	0	0.0155	0	0	0.0746	0
GM37541	0.0213	0	0.0208	0	0	0	0	0	0	0	0	0.0274	0	0	0	0	0	0.0202
GM38021	0.0315	0	0.0927	0.0516	0	0.099	0	0	0.0408	0	0	0.0407	0	0.0552	0.1506	0	0	0.03
GM6136	10.4358	11.9323	11.247	8.535	8.4177	9.763	13.5942	15.6333	13.2782	13.6361	11.7087	10.3219	17.2782	12.9108	17.8765	14.26	16.3786	16.888
GM37967	0	0	0	0	0.0178	0.0386	0	0.024	0	0	0	0	0.0168	0.0485	0	0	0	0
GM28375	0.1144	0	0	0.0936	0.2208	0.3591	0.3113	0	0	0.1605	0	0	0	0	0.5463	0.1123	0	0.218
GM37017	0	0	0	0	0	0	0	0	0	0	0	0	0	0	0	0	0	0
GM37447	0	0.0183	0	0.0275	0.0324	0	0.0229	0	0	0.0236	0	0.065	0.0153	0.0441	0	0	0	0.032
AKP-PS1	0.1423	0.0518	0.1625	0.4072	0.366	0.1736	0.0323	0.0924	0.092	0	0.0621	0.0306	0.0216	0	0	0	0.025	0.0226
GM29371	0	0	0	0	0	0.0582	0.1512	0.0722	0.3594	0	0	0	0	0	0	0	0	0
ALPPL2	0.0872	0.0238	0.0214	0	0	0	0	0	0	0	0	0	0	0.0191	0.0208	0	0	0
ALPI	0	0	0	0.0172	0.0203	0.022	0	0	0	0	0	0	0	0	0	0	0	0
GM29372	0	0	0	0	0	0	0	0	0	0	0	0	0	0	0	0	0	0
AKP3	0.0234	0.0256	0	0	0	0	0	0	0	0	0	0	0	0	0	0	0	0.0223
GM29374	0	0	0	0	0.0354	0.0384	0	0	0	0	0	0	0.0335	0	0	0.0361	0.0388	0.07
ECEL1	0.1265	0.1227	0.0688	0	0.0136	0	0.0191	0.0183	0.0363	0.0592	0	0	0	0	0.0134	0.207	0.1187	0.1607
PRSS56	0.4739	0.6158	0.9061	1.2551	1.4371	0.9208	0.1842	0.2931	0.4085	0.2533	0.7976	0.4073	0.2059	0.0593	0.1078	0.1108	0.0715	0.1075
CHRND	0.015	0.0163	0	0.0367	0.0144	0.0313	0.9973	0.8551	0.8125	0	0.0392	0.0193	0.0137	0	0.0429	0	0	0
CHRNG	0.0355	0.0129	0.0231	0.0097	0.0456	0	0.0321	0.0307	0.0306	0	0.0464	0.0609	0.0108	0.0414	0.0226	0.0348	0.0499	0.0338
EIF4E2	20.4546	21.4796	20.9499	19.0153	19.2295	20.4873	15.0852	15.3923	14.1688	18.4161	19.1982	18.6716	23.0552	22.3611	22.8564	20.9945	20.3938	20.246
GM26187	0	0	0	0	0	0	0	0	0	0	0	0	0	0	0	0	0	0
EFHD1	1.5975	1.8193	1.5871	0.8521	0.7372	1.0658	0.0945	0.2405	0.0898	0.0325	0.0909	0	0.0422	0.0203	0	0.0682	0.1955	0.1324
EFHD1OS	0	0	0	0	0	0	0	0	0	0	0	0	0	0	0	0	0	0
GIGYF2	7.0322	7.5693	6.9441	6.0004	6.4512	6.8323	7.0798	6.1666	7.5347	5.2687	7.0803	7.5669	5.0516	4.937	4.723	4.8392	4.3692	4.8868
GM22549	0	0	0	0	0.8873	0.4811	0	0	0	0	0	0	0	0.8053	0.4391	0.4515	0	0
KCNJ13	0.1162	0.0423	0.0759	0	0.1495	0.0811	0.1054	0.2516	0.0501	0.0544	0.2535	0.2497	0	0.1357	0.074	0.1522	0.2454	0.1476
GM23504	0	0	0	1.2706	0.9994	0	0	0	0.6695	0.7267	1.3557	0.6676	0	0.907	0.9892	0	0	0.4934
3110079O15RIK	0.6133	0.595	0.8007	0.6687	0.526	0.6416	0	0	0.1762	0	0	0	0	0	0.0651	0.0669	0	0
NGEF	0	0.055	0.0617	0.0927	0.0972	0.1318	0.2399	0.2782	0.3095	0.2475	0.4288	0.4223	3.3447	3.3099	2.8275	2.1155	2.354	2.2328
NEU2	0	0	0	0	0	0	0.0517	0.0247	0.0491	0	0.0249	0	0.0866	0.1331	0.1451	0.1306	0.0602	0
GM17181	0	0	0.7834	0.3271	0.7719	1.2554	0	0.5195	0	0	1.0471	0	1.0947	0	0	0	0	0
GM6153	0	0	0.0455	0	0	0.0487	0	0	0	0	0	0.0599	0	0.0407	0	0	0	0
INPP5D	0.0518	0.0494	0.019	0	0.0062	0.0135	0.0088	0.042	0.0167	0	0.0254	0.0167	0.0177	0.034	0.0124	0.0127	0.0068	0
ATG16L1	8.4414	7.7353	8.1215	5.4537	5.7783	5.993	6.457	6.1188	6.798	8.9625	9.7185	8.7682	3.2492	3.1056	3.5966	3.0558	2.6215	2.7898
GM25395	364.278	356.127	416.07	312.128	316.927	324.162	600.552	585.633	636.068	742.609	668.837	785.13	216.33	284.483	288.129	258.426	299.382	312.277
SCARNA6	265.851	215.998	269.799	412.385	337.3	368.27	344.445	321.649	334.596	310.777	227.458	287.691	172.25	183.067	179.075	305.359	312.973	259.144
SAG	0.0553	0.0724	0.0541	0.0587	0.0426	0.0752	0.1503	0.1507	0.1214	0.2093	0.1736	0.1282	0.0403	0.0435	0.0317	0.0651	0.0233	0.0579
DGKD	23.7943	24.9586	23.5898	16.6291	17.0196	18.7555	33.235	32.0878	34.9884	28.4294	36.1286	34.1482	17.4029	14.8814	14.8432	17.9419	16.2018	17.2449
GM19582	0.0585	0.2554	0.0573	0.2871	0.1129	0.306	0.0796	0.6838	0.2269	0.0821	0.1531	0.3017	0.2135	0	0.1117	0.3447	0	0.223
4833421G17RIK	0	0.1272	0.1142	0	0	0	0	0	0	0	0	0.0751	0	0	0.0557	0	0	0.1666
GM38365	0	0.0179	0	0.0269	0.0793	0	0.0224	0.0427	0.0638	0	0.0215	0.0424	0.03	0.0144	0.0785	0	0.0174	0.0313
USP40	4.3018	4.1614	4.1518	3.3081	3.4829	3.7419	2.5367	2.5728	2.947	4.2684	5.083	4.5308	4.5106	3.9669	4.1836	4.3993	4.4711	4.0436
GM25198	0	0	0	0	0	0	0	0	0	0	0	0	0	0	0	0	0	0
GM5832	0.311	0.4752	0.4568	0.3815	0.3301	0.6182	0.4653	0.2019	0.3217	0.6109	0.2442	0.3608	0.3972	0.2723	0.2673	0.2138	0.2955	0.2963
GM15375	0	0	0	0.0474	0	0	0	0	0	0	0	0	0	0	0	0	0	0
UGT1A10	0	0	0	0	0	0	0	0	0	0	0	0	0	0	0	0	0	0
GM20528	0	0	0	0	0	0	0	0	0	0	0	0	0	0	0	0	0	0
UGT1A9	0	0	0	0	0	0	0	0	0	0	0	0	0	0	0	0	0	0
UGT1A8	0	0	0	0	0	0	0	0	0	0	0	0	0	0	0	0	0	0
UGT1A7C	0.0233	0.0509	0.0343	0.1431	0.1688	0.2806	0.3331	0.3029	0.2714	0	0.0305	0	0.0213	0.0204	0.0334	0.2977	0.2462	0.3555
GM15373	0	0	0	0	0	0	0	0	0	0	0	0	0	0	0	0	0	0
UGT1A6B	0.062	0.0451	0.0405	0.0507	0.0797	0.0432	0.0843	0.0268	0	0	0	0	0.1319	0.1085	0.0789	1.3386	1.4172	1.2004
GM15372	0	0	0	0	0.0569	0	0	0	0	0	0	0	0.0538	0	0	0	0.1245	0
GM15370	0	0	0	0	0	0	0	0	0	0	0	0	0	0	0	0	0	0
UGT1A6A	0.2852	0.2989	0.2793	0.3733	0.3853	0.4417	0.0776	0.1185	0.0443	0	0	0.0147	0.1041	0.0899	0.109	0.4257	0.4456	0.4131
GM15369	0	0	0	0	0	0	0	0	0	0	0	0	0.1139	0	0.1193	0.2452	0	0.119
GM15374	0	0	0	0	0.225	0	0	0.1514	0	0	0	0	0	0	0	0	0.0615	0.0555
GM15371	0	0	0	0	0.0605	0	0	0	0	0	0	0	0	0	0	0	0	0.1196
UGT1A5	0	0	0.0437	0	0	0	0	0	0	0	0	0	0	0	0	0.0219	0	0.0426
GM15368	0	0	0	0	0	0.06	0	0	0	0	0	0	0	0	0	0.0563	0	0.0546
GM15376	0	0	0	0	0	0	0	0	0	0	0	0	0	0	0	0	0	0.0599
UGT1A2	0	0	0	0	0	0.0233	0	0	0	0	0	0	0	0	0.0213	0	0	0
DNAJB3	0	0	0	0	0	0	0	0	0	0	0	0	0	0	0.0894	0.046	0	0
UGT1A1	0	0.0241	0	0	0.0213	0	0	0	0	0	0.029	0	0	0	0	0	0	0
MROH2A	0.5967	0.6829	0.7659	1.2367	1.2074	1.2426	0.859	0.9782	0.9513	0.7723	1.4029	1.7253	0.5285	0.5784	0.6363	0.7794	0.7033	0.8446
HJURP	55.5751	59.2449	53.2675	54.46	57.5829	60.7029	64.5578	59.6008	64.0496	57.7303	67.567	64.7812	49.1877	46.4199	48.4515	33.6857	31.4494	30.4742
TRPM8	0.0208	0.0681	0.0305	0.051	0.0702	0.0544	0	0	0	0	0	0.0134	0.019	0.0546	0.0496	0	0.011	0.0198
4930453O03RIK	0	0	0	0	0	0	0	0	0	0	0	0	0	0	0	0	0	0
SPP2	0	0	0.0486	0	0	0	0	0.0644	0	0	0	0	0	0	0	0	0	0
GM29538	0	0	0	0	0	0	0	0	0	0	0	0	0	0	0	0	0	0
GM28888	0	0	0	0	0	0	0	0	0	0	0	0	0	0	0	0	0	0
GLRP1	0.0754	0.0549	0.0739	0	0	0.0263	0.7865	0.7509	0.9101	0.388	0.691	0.2269	8.5776	7.3091	9.5075	13.7254	12.6318	14.1323
GM19589	0	0	0	0	0	0	0.2296	0.0974	0.1212	0.0526	0.0246	0.0242	1.232	0.7556	0.9135	0.1289	0.3366	0.1072
GM38130	0	0	0	0	0	0	0	0	0	0	0	0	0	0	0	0	0	0
GM29336	0	0	0	0	0	0	0.1168	0	0.111	0	0	0	0	0	0	0	0	0
ARL4C	10.3286	12.0649	9.9568	4.9453	5.6527	6.5512	72.7925	69.1429	75.3623	45.2132	55.5214	53.1591	30.0583	29.9048	28.3433	26.2752	24.9266	25.5206
GM29335	0	0	0	0	0	0.2243	0	0	0	0	0	0	0.0978	0.0939	0.1024	1.0525	0.6789	1.5319
PLATR5	0.43	0.1877	0.1685	0.0703	0.6639	0.18	0.117	0	0	0	0	0	0.3923	0.7532	0.4929	0.4223	0.6356	0.3278
GM29337	0	0	0	0	0	0	0	0	0	0	0	0	1.2643	2.1239	2.3162	4.4228	5.8517	3.9613
GM4753	0	0	0	0	0	0	0	0	0	0	0	0	0	0	0	0	0	0
1700067G17RIK	0	0	0	0	0	0	0	0	0	0	0	0	0	0	0	0	0	0
GM18699	0	0	0.1983	0.1656	0	0	0	0	0	0	0	0	0.1847	0	0	0	0.2137	0
SH3BP4	1.5206	1.6176	1.3477	1.9835	1.7736	2.4065	2.1207	2.0749	2.1401	1.634	2.6329	2.8289	5.3031	3.0847	3.0974	3.147	3.0477	2.5951
GM38312	0	0	0	0.023	0.0272	0	0	0	0	0.1186	0	0.1453	0.0514	0.0494	0.1076	0	0.0297	0.0268
GM5259	0	0	0	0	0	0.0643	0.0836	0.0799	0.0795	0.0863	0	0.0793	0.0561	0.0539	0	0	0	0
GM28342	0	0	0	0	0	0	0	0	0	0	0	0	0	0	0.0798	0	0	0
C030007H22RIK	0.0832	0	0.0815	0	0	0	0	0	0	0	0	0	0	0	0	0	0	0
AGAP1	5.1526	5.2017	4.3599	4.6013	4.8013	5.2736	4.8744	4.8179	5.5532	4.301	7.2837	6.8703	3.645	3.3297	3.2458	3.1255	2.4489	2.6323
GM37297	0.0825	0.045	0.101	0.0506	0.0597	0.0432	0	0.0536	0.0267	0.0869	0.108	0.0266	0.0188	0.0361	0.0394	0.1013	0.0436	0.0983
GM28499	0.1477	0.1612	0.0723	0.0604	0.1426	0	0	0	0	0	0.1934	0	0.0674	0	0.2116	0	0.156	0.0704
4933400F21RIK	0.058	0.0791	0.0284	0.0593	0.056	0.0759	0.1578	0.0188	0.075	0.061	0.1139	0.1869	0.0794	0.0635	0.1246	0.057	0.1224	0.1934
GM26037	0	0	0	0	0	0.1655	0	0	0	0	0.2071	0	0	0.1385	0	0	0.167	0.1507
GM37521	0	0	0.0236	0	0.1393	0.0755	0.0327	0	0.0311	0	0	0	0.0219	0	0	0.0236	0.0254	0.0917
GBX2	0	0	0	0	0	0	0	0	0	0	0	0	0	0	0	0.0222	0	0
D130058E05RIK	0.0161	0	0	0	0	0	0	0	0	0	0	0	0	0	0	0	0	0
ASB18	0	0	0	0	0	0	0	0	0	0	0	0	0	0.0109	0	0	0	0
IQCA	0.0115	0.0251	0.0113	0.0094	0.0333	0.0722	0	0.0149	0	0	0	0	0.0315	0.0201	0.011	0.0226	0.1093	0.0219
4930434B07RIK	0	0.0526	0.0472	0.1183	0.0931	0.0505	0	0	0	0	0	0	0	0	0	0.1421	0	0.046
ACKR3	18.8384	18.6202	18.0597	10.2754	11.3852	11.7304	1.719	1.6222	1.5389	0.433	1.1156	1.1935	6.7968	6.8075	7.0309	6.4501	5.941	5.5165
GM38277	0	0.0393	0	0	0	0	0	0	0	0	0	0	0.0657	0	0	0	0.038	0
GM28721	0.0536	0.1755	0.1574	0.0438	0	0	0	0	0	0	0	0	0.0489	0.1408	0	0	0	0.0511
GM28723	0.4915	0.3219	0.4813	0.1608	0.2371	0.0514	0.0669	0	0	0	0	0	0.3139	0.2582	0.1878	0.3378	0.1038	0.1405
GM28722	0	0	0	0	0	0	0	0	0	0	0	0	0	0	0	0	0	0.0452
GM35048	0.0176	0.0192	0	0.0431	0.0339	0.0551	0	0	0	0	0	0	0	0	0.0335	0.0517	0	0.0669
COPS8	43.1915	45.7522	43.5209	34.3566	34.3853	36.0006	22.9133	23.1134	25.6401	34.656	35.3551	32.3262	27.1438	24.1961	24.6228	22.6673	22.429	21.0879
GM9991	0	0	0	0	0	0	0.1109	0	0	0	0	0	0	0	0	0.04	0	0
COL6A3	0.1645	0.1257	0.149	0.2825	0.3651	0.3442	0.1231	0.0961	0.0904	0.0866	0.0646	0.0954	14.0618	12.0577	11.6569	5.795	3.9895	4.0791
GM36970	0	0	0	0	0	0	0	0	0.0342	0	0	0	0.2173	0.3245	0.1264	0.1819	0.1117	0.1009
4930474B08RIK	0	0	0	0	0	0	0	0	0	0	0	0	0	0	0	0	0	0
MLPH	0.1469	0.2005	0.1799	0.0376	0.0177	0.0096	0.4622	0.3698	0.4868	0	0.024	0.0118	0.1089	0.1287	0.1754	0.0271	0.0097	0.0088
PRLH	0	0	0	0	0	0	0	0	0	0	0	0	0	0	0	0	0	0
RAB17	0.0741	0.0809	0.0726	0.505	0.5957	0.491	0.2352	0.0642	0.1277	0	0	0	0.1577	0.1298	0.3538	0.0485	0.0261	0
GM28199	0.2384	0.2602	0.0778	0.13	0.1534	0.1663	0.1081	0.2064	0.2055	0	0	0	0	0	0	0	0	0
LRRFIP1	34.9226	36.4721	35.525	29.5942	30.3204	33.6253	48.9714	40.546	46.0754	53.0364	68.2304	57.2687	24.7138	21.5521	22.4793	18.2742	17.4209	18.1953
RBM44	0.0151	0.0082	0.0074	0.0185	0.0073	0	0.0103	0.0294	0.0098	0.0106	0.0099	0.0292	0	0.0066	0.0144	0	0	0
GM7776	0.3416	0.1492	0.0669	0.0559	0.1319	0.0715	0	0.1775	0.0883	0.0959	0	0.0881	0	0.1795	0	0	0.0721	0
RAMP1	2.7838	3.5892	2.6943	0.0799	0.1414	0.017	0.0443	0.0211	0	0	0	0.021	0.0297	0	0.0466	0	0	0.0155
UBE2F	8.986	9.3946	9.9877	7.1353	8.0153	7.5445	8.363	8.267	7.8843	8.2914	9.5337	8.529	6.7462	5.8765	6.0259	6.928	7.0835	7.7084
GM7785	0.9928	0.8428	0.8102	0.9473	1.0111	0.981	1.8005	1.8624	1.4262	1.0835	1.5161	1.0666	1.0063	0.9177	0.8955	1.2457	0.9315	0.8408
GM26683	0.2094	0.1142	0.3075	0.428	0.707	0.5476	0.1424	0.4078	0.406	0.4406	0	0.2699	0	0.1833	0.1	0.5139	0	0.2992
SCLY	24.0309	23.6312	21.1078	15.0544	14.463	14.5965	4.2367	3.8205	4.6143	2.1397	4.5159	4.7406	3.8282	3.6369	3.6977	1.9328	2.2148	1.9064
GM17090	1.7068	2.5204	1.8681	1.3138	2.2281	1.9959	0	0	0.3894	0.4226	0.6571	0.6472	0.2748	0.3517	0.2877	0.0986	0.212	0.0957
ESPNL	0.1536	0.2564	0.1593	0.133	0.1395	0.0851	0.1229	0.1291	0.1986	0.1395	0.1538	0.1165	0.8161	0.5776	0.7335	0.142	0.1621	0.0775
KLHL30	38.9884	39.6154	37.1359	8.5839	8.8208	10.1812	1.6464	1.6548	1.9356	0.2011	0.3127	0.1643	1.8308	2.399	2.3272	0.1095	0.0672	0.0152
ERFE	3.8624	4.5016	4.2616	0.9577	1.0624	1.5359	0.0951	0.1816	0.1356	0.2943	0.1601	0.1577	0.1276	0.1071	0.0835	0.0172	0.0369	0.05
ILKAP	15.6907	15.927	15.782	15.4978	15.225	14.8321	10.8521	11.2818	12.0894	15.6305	16.876	15.6738	14.0401	12.8803	14.5285	9.1995	8.5247	8.6732
1700020N18RIK	0	0	0	0	0	0	0	0	0	0	0	0	0	0	0	0	0	0
HES6	19.9728	16.8986	17.907	11.1941	12.1298	12.6403	21.5415	19.1899	22.4805	8.0564	8.2634	8.2791	4.5677	5.3855	4.9376	4.9433	4.2512	3.7853
PER2	0.9325	0.7244	0.6335	0.3642	0.4134	0.3604	0.4914	0.6547	0.4888	0.3654	0.7258	0.7365	1.5482	1.1183	1.3319	2.3842	1.8003	2.1453
GM28381	0	0	0	0	0	0	0	0	0	0	0	0	0	0	0	0	0	0
GM28382	0	0	0	0	0	0	0	0	0	0	0	0	0.0538	0.1291	0.0845	0	0.0622	0
GM19085	0	0	0	0	0.022	0	0	0	0.0588	0	0	0.0587	0.0208	0.0199	0.0217	0	0	0.065
TRAF3IP1	5.4075	5.7283	5.3344	4.4225	4.4247	5.6159	5.156	4.2173	5.312	4.8167	7.9977	8.5605	3.5186	2.8669	2.9999	2.8632	2.2525	2.6519
ASB1	17.2176	18.0321	16.6887	10.9349	12.7086	14.0765	2.5698	2.3246	2.5415	5.4737	5.6769	5.1869	3.9775	3.8114	3.7912	3.5377	3.3589	3.3306
GM28380	0	0	0	0	0	0	0	0	0	0	0	0	0	0	0	0	0	0
GM29100	0.0223	0	0.0109	0.0456	0.0108	0.0467	2.2458	2.3907	2.0481	2.7237	4.0303	3.9839	2.1475	2.1982	2.4931	1.8623	1.8842	1.8814
TWIST2	0.031	0	0	0.0254	0.015	0.0324	5.798	6.0997	6.6533	13.1149	13.0053	12.2696	11.949	10.8864	10.7915	6.4536	5.9067	6.129
GM29101	0	0.073	0	0	0.0323	0.035	0	0.0434	0.0865	0	0	0.1725	0.0915	0.0586	0.1597	0.0985	0.1412	0.0637
GM37600	0	0	0	0	0	0	0.0203	0.0194	0	0	0	0	0	0	0	0.0294	0	0.0142
HDAC4	4.4521	4.5909	4.1649	3.3969	4.0946	4.7133	2.5772	1.9921	2.3974	2.2614	2.7896	2.92	2.4041	1.8091	2.1631	2.9635	2.6044	2.8162
GM37048	0.0441	0.0674	0.0432	0.0938	0.0426	0.0646	0.048	0.0115	0.0456	0.0124	0.0346	0.0455	0.0724	0.0232	0.0674	0.052	0.0466	0.0588
GM26720	0	0	0	0	0.0134	0	0	0	0	0	0	0	0	0	0	0	0	0
GM37036	0.0393	0.0214	0.0192	0.0321	0	0.0616	0	0	0	0.0275	0.0257	0.0253	0.0716	0	0	0.0386	0.0414	0.0748
GM29099	0	0	0	0	0	0	0	0	0	0	0	0	0	0	0	0	0	0
GM7837	0	0	0	0	0	0	0	0	0	0	0	0	0	0	0	0	0	0
NDUFA10	99.6649	101.249	101.159	96.925	96.5772	103.563	42.4298	43.4476	40.6541	63.6444	60.9952	56.2665	59.5836	56.4842	56.4921	56.0988	54.4125	58.1763
MIR6900	0	0.8949	0	0.6706	0	0.8579	1.1153	0	0	0	0	0	0	0	0	0	0	0
OLFR1416	0	0	0	0	0	0	0	0	0	0	0	0	0	0	0	0	0	0
OLFR1415	0	0	0	0	0	0	0	0	0	0	0	0	0	0	0	0	0	0
OLFR1414	0	0	0	0.0132	0	0	0	0	0	0	0	0	0	0	0	0	0	0.0077
OLFR1413	0	0	0	0	0	0	0	0	0	0	0	0	0	0	0	0	0	0
1700054K02RIK	0	0	0	0	0	0	0	0	0	0	0	0	0	0	0	0	0	0
GM28478	0	0	0	0	0	0	0	0	0	0	0	0	0	0	0	0	0	0
OLFR1412	0	0	0	0	0	0	0	0	0	0	0	0	0	0	0	0	0	0
GM44098	0	0	0	0	0	0	0	0	0	0	0	0	0	0	0	0	0	0
OLFR1411	0	0	0	0	0	0	0	0	0	0	0	0	0	0	0	0	0	0
GM44099	0	0	0	0	0	0	0	0	0	0	0	0	0	0	0	0	0	0
OLFR1410	0	0	0	0	0	0	0	0	0	0	0	0	0	0	0	0	0	0
OLFR12	0	0	0	0.0097	0	0	0	0	0	0	0	0	0	0	0	0	0	0
COPS9	241.031	248.848	235.878	192.458	185.76	179.175	61.2944	59.8464	58.5997	69.7695	65.4288	66.4302	54.6143	54.5236	55.1346	64.1669	67.524	63.5437
OTOS	0.4629	0.4181	0.4533	0.4439	0.6007	0.501	0.0434	0.0622	0	0	0.0836	0.0617	0.0146	0.028	0.0762	0.0314	0.0169	0.0304
GM29483	0.1369	0	0.0894	0.0747	0	0	0	0	0	0	0	0	0	0	0	0	0	0
GM29482	0	0	0	0	0	0.2238	0	0	0	0	0	0	0	0	0	0	0	0
GM29481	0	0	0	0	0	0	0	0	0	0	0	0	0	0.0411	0	0	0.099	0.0447
GPC1	71.2451	75.5213	63.3725	60.5145	65.2	74.4399	18.575	16.4972	17.3596	13.5148	16.3647	17.5316	69.6345	66.5597	63.0415	39.9107	32.193	31.1295
GM29480	0.0892	0.1622	0.0873	0.0486	0.086	0.0311	0	0.0386	0	0.0834	0	0	0.0814	0.0521	0.0852	0.0876	0	0.0283
MIR149	0.7454	0.8136	0	0.6096	0	0	0	0	0	0	0	0	0	0	0	0	1.5737	0
ANKMY1	0.0609	0.0222	0.0497	0.083	0.0588	0.0106	0.0138	0.0527	0.0131	0.0285	0.0133	0.0131	0.0278	0.0178	0.0873	0.0399	0.0429	0.0484
DUSP28	19.5816	19.2879	18.4794	8.3902	7.478	7.1685	10.3893	10.6493	10.9884	6.5145	6.6652	7.2404	5.0895	5.6396	5.2921	2.206	2.4504	2.6399
5033417F24RIK	0.2753	0.601	0.2426	0.2026	0.1063	0.2016	0.3745	0.4648	0.2492	0.309	0.4685	0.3549	0.3767	0.2652	0.2366	0.0811	0.0581	0.1049
RNPEPL1	5.9866	5.7399	5.1145	3.7317	3.9562	4.3877	2.5094	2.1328	2.6472	1.9834	3.2243	3.2695	2.105	2.23	2.1937	1.1686	0.7022	0.7823
9430060I03RIK	0.3204	0.4133	0.2852	0.3335	0.5059	0.5486	0.4358	0.4161	0.6402	0.327	0.5338	0.2253	0.6643	0.4336	0.3616	0.6293	0.492	0.4441
CAPN10	12.022	12.2069	11.0413	8.425	8.4868	8.5985	9.5621	8.4979	10.406	12.4691	13.5434	13.1055	6.1965	6.0968	6.3029	9.6821	8.4485	8.1434
GPR35	0.0203	0	0	0.0083	0.0196	0	0.0277	0	0.0526	0	0.0133	0.0524	0.0835	0.0979	0.0777	0	0.0107	0.0194
GM18697	0	0	0	0	0	0	0	0	0	0	0	0	0	0	0	0	0	0
AQP12	0	0	0	0	0	0	0	0	0	0	0	0	0	0	0	0	0	0
KIF1A	3.1269	3.0272	2.7885	0.0086	0	0.0221	0	0.0068	0	0	0.0069	0	0.0048	0	0.0101	0.0052	0	0.005
GM28086	0	0	0	0	0	0	0	0	0	0	0	0	0	0	0	0	0	0
AGXT	0	0	0	0	0	0	0	0	0	0	0	0	0	0.0254	0	0.0285	0	0.3315
2310007B03RIK	0	0	0	0	0	0	0	0	0	0	0	0	0	0	0.0198	0	0.0219	0.0198
CROCC2	0	0	0	0.0056	0	0	0	0	0	0	0	0	0.0063	0.0121	0.0264	0.5351	0.699	0.585
SNED1	0.0467	0.0396	0.0406	0.0212	0.06	0.0542	0.0423	0.0539	0.0268	0.0218	0.0271	0.0267	0.0662	0.059	0.0743	0.0611	0.0492	0.0346
MIR6901	0	0	0	0	0	0	0	0	0	0	0	0	0	0	0	0	0	0
MTERF4	5.8148	6.0001	5.7401	4.6946	4.4758	4.7654	6.4368	6.7278	5.5872	7.1115	7.1716	6.197	4.4534	4.512	4.3411	4.6468	4.2662	4.4377
GM28535	0.4447	0.2427	0.2722	0.3637	0.4827	0.2908	0.3781	0.2888	0.1437	0.156	0.2911	0.215	0.2029	0.0487	0	0.1638	0	0.1059
GM7867	0.6307	0.1967	0.2647	0.6632	0.2608	0.4714	0.6128	0.7022	0.5825	0.885	0.2359	0.5808	0.3288	0.2367	0.6884	0.2654	0.3805	0.2576
PASK	4.5233	4.4272	4.4616	5.1117	5.3023	5.4938	5.2885	5.7972	5.6025	4.0079	5.3523	5.0055	3.2449	2.9293	2.8523	3.0661	2.9062	2.2507
PPP1R7	7.4675	6.9837	6.5829	8.3847	8.8516	9.6863	4.3423	3.4398	3.7031	3.3415	6.0379	5.2638	4.3622	3.8425	4.0113	3.1164	3.261	2.9613
MIR6902	0	0	0	0	0	0	0	0	0	1.0786	0	0	0	0	0	0	0	0
MIR6345	0	0.4195	0	0	0.3709	0.4021	0	0	0	0	0	0	0.3506	0	0	0	0	0
GM26446	0	0	0	0.7813	0	0	0	0	0	0	0	0	0	0.4183	0	0	0	0
ANO7	0.0123	0	0.0121	0.0303	0.0238	0	0.0336	0	0	0	0	0.0478	0.0338	0.0216	0.0472	0.0485	0.013	0.0235
HDLBP	29.4272	33.0569	28.6517	25.9866	25.9235	29.5739	29.0201	25.6317	29.6738	32.0587	41.722	41.2997	42.2028	35.712	34.5166	34.8885	32.9127	32.9374
GM17415	0.873	1.293	0.4274	0.714	1.3236	1.1743	1.1026	0.8908	1.048	1.3999	0.653	0.4019	1.1377	0.9829	0.9528	1.2246	1.3164	1.1288
2022-09-02	102.162	110.049	108.874	141.314	142.098	152.682	81.7642	74.5064	70.5981	84.6492	82.9366	74.1414	81.981	72.1185	78.4538	77.034	89.717	88.535
FARP2	1.654	1.4975	1.6382	1.8677	2.0765	2.3991	0.8181	0.6103	1.0206	2.2681	2.6325	2.726	2.1091	1.1687	1.2924	1.0982	1.0714	1.1282
GM37250	0	0.0225	0	0.0337	0	0	0	0	0	0.0289	0	0	0.0376	0.0361	0.0394	0.0202	0.0217	0
STK25	19.8753	20.5654	20.6656	21.1636	20.1246	21.1221	15.3942	16.2598	17.3354	12.3646	13.0635	14.1323	13.6843	15.2337	17.001	16.4997	15.3156	13.5982
GM28536	0.635	0.6523	0.439	0.5499	0.865	0.6253	0.8638	0.4366	0.6762	0.3145	0.4401	0.2408	0.7838	1.2104	0.5351	0.8437	0.5126	0.4271
BOK	4.385	6.3034	3.6919	1.9244	2.2445	1.8183	75.5752	74.5567	80.6493	58.115	56.943	54.3947	68.276	69.6373	66.2643	35.9966	32.7972	29.858
THAP4	4.5884	4.7773	4.826	2.3393	2.5195	2.8583	7.545	6.5474	7.7472	7.2961	8.6931	9.311	7.5735	6.847	7.5245	8.4779	8.2613	7.8234
GM10550	0.2004	0.1094	0.1472	0	0.0483	0.1572	0.1363	0.1952	0.1295	0.8436	0.7214	0.2584	0.1828	0.0877	0.0478	0.0984	0	0
ATG4B	15.1194	15.665	15.1612	10.6497	10.8208	11.3043	11.5116	10.9452	11.2568	9.2816	10.0587	10.1062	8.8866	8.0412	8.1222	9.3493	9.3603	9.015
DTYMK	83.4355	80.329	80.6636	125.634	121.208	120.22	32.1498	31.96	30.0507	71.0793	74.4576	65.9332	63.3584	60.8518	62.4504	34.4839	38.1162	34.3508
ING5	17.0407	17.6563	16.6062	12.4479	12.9589	14.0409	9.8631	8.823	9.5632	10.8899	12.1605	11.4674	7.0803	7.0243	6.6369	6.3747	6.9296	5.9376
GM22089	0	0	0	0	0	0.5046	0	0	0	0	0	0	0	0	0.4606	0	0	0
D2HGDH	3.5281	3.5245	3.6238	4.9156	4.768	4.7613	3.0951	2.806	2.7339	1.9028	2.7227	2.6224	2.8622	2.1235	2.5133	2.9453	2.3049	2.5732
GAL3ST2	0.1124	0.1402	0.0472	0.0263	0.1705	0.168	0	0	0.0623	0	0	0	0	0	0	0	0	0
GM18666	0.1027	0.056	0.0503	0.042	0	0.0537	0	0	0	0	0.0672	0	0	0	0	0	0	0
GAL3ST2B	0	0	0	0	0	0	0	0	0	0	0.0703	0	0	0	0	0	0	0
GM7889	0	0.056	0	0	0	0.0537	0	0	0	0	0	0	0	0	0	0	0	0
GAL3ST2C	0.0051	0	0	0	0	0.0053	0	0	0	0	0	0.0197	0	0	0	0	0	0
NEU4	0	0	0	0	0	0	0	0	0	0	0	0	0	0	0	0	0	0
PDCD1	0.051	0	0	0	0	0	0	0	0	0	0	0	0	0	0	0	0	0
GM7891	0	0	0	0	0	0	0	0	0	0	0	0	0	0	0	0	0	0
GM7895	0.4614	0.2289	0.4518	0.2401	0.4047	0.7021	0.6846	0.6537	0.7049	1.0005	0.8235	0.6489	0.4592	0.1836	0.3204	0.453	0.2214	0.1598
GM23389	0	0	0	0	0	0	0	0	0	0	0	0	0	0	0	0	0	0
4930440C22RIK	0	0	0	0	0	0	0	0	0	0	0	0	0	0	0	0	0	0
GM23181	0	0	0	0	0	0	0	0	0	0	0	0	0	0	0	0	0	0.4261
GM5264	0	0	0	0	0.112	0.0607	0	0	0	0	0	0	0	0	0	0	0	0
FAM174A	10.7102	9.2021	9.8679	7.1964	6.6264	7.2814	6.2693	6.079	5.8929	4.1873	5.2974	4.7695	3.6082	3.7679	3.8162	6.3223	7.2388	7.0791
BC055308	0.0388	0.0212	0	0.0159	0	0	0	0.0504	0	0	0	0.05	0.0354	0.034	0.0185	0.0381	0.0818	0.0369
GM15427	14.4535	14.3592	12.3395	18.7164	15.7337	16.8667	19.0298	19.3733	19.4055	10.4004	12.8553	13.0197	25.4422	24.2602	25.4834	27.0211	27.9718	28.514
ST8SIA4	0	0	0	0	0	0.0026	0	0	0	0	0	0	0	0	0	0	0	0
GM37642	0	0	0	0	0	0	0	0	0	0	0	0	0	0	0	0	0	0
4930598F16RIK	0	0	0	0	0	0	0	0	0	0	0	0	0	0	0	0	0	0
GM37761	0	0	0	0	0	0	0	0	0	0	0	0	0	0	0	0	0	0
GM22360	4.1381	2.5091	2.7016	1.8802	2.2182	5.7726	5.0033	4.1801	5.3501	5.1613	3.6111	4.1494	6.7115	3.2213	2.1956	0.903	2.4268	0.8762
1700063A18RIK	0	0	0	0	0	0	0	0	0	0	0	0	0	0	0	0	0	0
GM24586	0	0	0	0	0	0	0	0	0	0	0	0	0	0	0	0	0	0
GM22917	0	0	0	0	0	0	0	0	0	0	0	0	0	0	0	0	0	0
GM37076	0	0	0	0	0	0	0	0	0	0	0	0	0	0	0	0	0	0
GM29601	0	0	0	0	0	0	0	0	0	0	0	0	0	0	0	0	0	0
4930533P14RIK	0	0	0	0	0	0	0	0	0	0	0	0	0	0	0	0.0829	0	0
GM26245	0	0	0	0	0	0	0	0	0	0	0	0	0	0	0	0	0	0
GM1833	0	0	0	0	0.0696	0	0	0	0	0	0	0	0	0	0	0	0	0.0687
GM26078	0	0	0	0	0	0	0	0	0	0	0	0	0	0	0	0	0	0
SLCO4C1	0	0	0	0	0	0	0	0	0	0	0	0	0	0	0	0	0	0
PANCT2	0	0	0	0	0	0	0	0	0	0	0	0	0	0	0	0	0	0
SLCO6B1	0	0	0	0	0	0	0	0	0	0	0	0	0	0	0	0	0	0
GM9499	0	0	0	0	0	0	0	0	0	0	0	0	0	0	0	0	0	0
GM28901	2.491	1.4727	1.5246	1.6129	0.701	0.6515	0.7059	1.2132	1.3419	1.1651	1.0869	1.0705	1.231	0.5454	0.793	1.1211	0.8765	0.4945
GM6430	1.5374	1.3338	1.2739	1.6443	1.2932	0.6599	1.2869	1.28	1.0193	1.8807	1.5996	1.8296	1.1508	1.1392	1.0542	1.471	1.5397	1.0893
SLCO6C1	0	0	0	0	0	0	0	0	0	0	0.0453	0	0	0	0	0	0.0183	0
GM7133	0	0	0	0	0	0	0	0	0	0	0	0	0	0	0	0	0	0
GM7135	0	0	0	0	0	0	0.0297	0.085	0.141	0.0612	0.1999	0.1406	0	0.0573	0.0208	0	0	0
GM37171	0	0	0	0	0	0	0	0	0.0537	0	0.163	0.1606	0	0	0.0396	0	0	0.0396
D1ERTD622E	0.7167	0.716	0.7718	0.5024	0.5491	0.487	1.4558	1.2725	1.3237	1.7824	1.5864	1.5026	0.9514	0.8226	0.9005	0.5775	0.5517	0.54
PPIP5K2	11.1148	12.497	11.5312	13.995	16.4942	19.4851	5.677	5.3939	5.4978	10.5222	11.589	9.4383	10.2026	8.1369	8.8638	6.9135	7.0564	7.3112
GIN1	2.0987	2.1574	2.1508	2.1688	2.2761	2.5532	1.2171	1.2255	1.22	1.8377	2.3638	1.9925	2.1002	1.9448	2.1675	1.3979	1.7517	1.1859
PAM	20.3458	21.5559	22.2175	92.42	94.3715	103.49	19.2565	17.747	16.4847	21.1417	23.0147	20.8327	14.2553	13.0499	14.2552	14.702	16.5382	15.444
GM37140	0	0.0319	0.0858	0.2867	0.0564	0.3057	0	0.0379	0.0378	0.082	0.0765	0.0753	0.2399	0.0512	0	0.1434	0.2467	0.167
GM25413	0	0	0	0.129	0	0	0	0.2048	0	0	0	0	0	0.1381	0	0	0	0
GM3531	12.7772	12.9572	13.2023	12.507	13.105	15.9996	10.948	11.76	11.5767	11.4349	13.4327	9.7279	13.8596	14.2733	15.0852	17.289	19.5415	15.6253
B230216N24RIK	0.0252	0.0459	0.0165	0.1375	0.1379	0.0967	0.0114	0.1201	0.0326	0.0708	0	0.0108	0.0383	0.0515	0.0642	0.0578	0.0621	0.0801
GM24465	0.4598	0	0	0	0	0	0	0	0	0	0	0.5928	0	0	0	0	0.9707	0.4381
1810006J02RIK	0	0	0	0	0	0	0	0	0	0	0	0	0	0	0	0	0	0
GM29461	0.0118	0	0.0231	0	0	0	0.016	0	0.0152	0.0165	0.0154	0	0	0	0	0	0	0
GM7952	0	0.0546	0	0	0	0	0	0.0649	0	0	0	0	0	0	0	0	0	0
GM29462	0.5125	0.7458	0.6691	0.1397	0.6593	0	0.6971	0.4437	0.6626	0.2397	0	0.4405	0.4675	0	0.3263	0.1677	0.1803	0
SLCO6D1	0	0	0	0	0	0	0	0	0	0	0	0	0	0	0	0	0	0
GM3555	0.0353	0.0385	0.2072	0.0865	0.1361	0.0369	0.1439	0.0458	0.0912	0.0495	0.0462	0.1819	0.0322	0.0309	0.0337	0.0693	0	0.0336
GM26134	0	0	0	0	0	0	0	0	0	0	0	0	0	0	0	0	0	0
GM7967	0.1654	0.1895	0.2024	0.7236	0.6462	0.7007	1.2484	1.2135	1.069	1.0442	0.8659	1.1832	0.0151	0.0072	0.0316	0.0244	0.0786	0.0394
GM29460	0.0689	0.0752	0.0675	0.5072	0.4654	0.2884	1.031	0.6264	0.9799	0.5801	0.9019	0.4442	0	0	0	0	0	0
GM23434	0	0	0	0	0	0	0	0	0	0	0	0	0	0	0	0	0	0
GM18248	0	0	0	0	0	0	0	0	0	0	0	0	0	0	0	0	0	0
CNTNAP5B	0	0	0	0.0077	0	0	0	0	0	0	0	0	0	0	0	0	0	0
TDPX-PS1	1.3185	1.7988	1.2105	1.2132	0.8746	1.7244	2.3539	2.4616	2.4505	3.7002	3.9912	3.081	1.7292	0.7217	1.1805	0.9711	1.7398	0.8637
GM37877	0	0	0	0	0	0	0	0	0	0	0	0	0	0	0	0	0	0
GM19029	0	0	0	0	0	0	0	0	0	0	0	0	0.0796	0	0.0833	0	0	0
GM23602	0	0	0	0	0	0	0	0	0	0	0	0	0	0	0	0	0	0
GM29668	1.5618	0.5114	3.0589	2.1715	1.3563	1.7974	1.4871	0.8114	0.8077	1.3149	0.6133	2.0135	1.2824	1.231	0.2983	0.6135	0.3297	0.1488
GM29667	0.502	0.3287	0.3933	0.4927	0.1938	0.4202	0.2731	0.2608	0.3894	0.5635	0.5257	0.6472	0.1832	0.1759	0.4794	0.7887	0.106	0.0957
GM18700	0	0	0	0	0	0	0	0	0	0	0	0	0	0	0	0	0	0
GM18185	0	0	0	0	0	0	0	0	0	0	0	0	0	0	0	0	0	0
GM29334	0	0	0	0	0	0	0	0	0	0	0	0	0	0	0	0	0	0
GM25537	0	0	0	0	0	0	0	0	0	0	0	0	0	0	0	0	0	0
GM20268	0	0	0	0	0	0	0	0	0	0	0	0	0	0	0	0	0	0
GM28801	0	0	0	0	0	0	0	0	0	0	0	0	0	0	0	0	0	0
PSMB6-PS2	0.1396	0	0	0.0571	0.0673	0	0	0.0906	0	0.0979	0	0	0	0.1222	0.0666	0.0685	0.0737	0.133
GM18969	0	0	0	0	0	0	0	0	0	0	0	0	0	0	0	0	0	0
GM28188	1.4592	1.8202	0.6124	11.9345	14.8844	14.3948	0	0	0	0	0	0	0.7607	0.9128	0.1991	0.4094	0.2201	0.1986
GM28187	0.5764	0.8052	0.7225	3.5636	3.737	4.7758	0	0.0299	0	0	0.0302	0.0297	0.3155	0.5047	0.5504	0.0679	0.219	0.1977
GM24122	0	0	0	0	0	0	0	0	0	0	0	0	0	0	0	0	0	0
GM28623	0	0	0	0	0	0	0	0	0	0	0	0	0	0	0	0	0	0
GM23036	0	0	0	0	0	0	0	0	0	0	0	0	0	0	0	0	0	0
GM3116	0	0	0	0	0	0	0	0	0	0	0	0	0	0	0	0	0	0.042
GM20281	0	0	0	0	0	0	0	0	0	0	0	0.2376	0	0.3227	0	0	0	0
GM22034	0	0	0	0	0	0	0	0	0	0	0	0	0	0	0	0	0	0
GM18728	0	0	0	0	0	0	0	0	0	0	0	0	0	0	0	0	0	0
GM23965	0	0	0	0	0	0	0	0	0	0	0	0	0	0	0	0	0	0
GM29141	0.0558	0	0	0.0456	0	0	0	0	0	0	0	0	0	0	0	0	0	0
GM37789	0	0.0372	0.0167	0	0	0	0	0	0	0	0	0	0.0155	0.1044	0.0325	0.3512	0.3775	0.4543
GM18447	0	0	0	0	0	0	0	0	0	0	0	0	0	0	0	0	0	0
GM29140	0	0	0	0	0	0	0	0	0	0	0	0	0	0	0	0	0	0
GM23537	0	0	0	0	0	0	0	0	0	0	0	0	0	0	0	0	0	0
GM5260	0	0	0	0	0	0	0	0	0	0	0	0	0	0	0	0	0	0
GM29592	0	0	0	0	0	0	0	0	0	0	0	0	0	0	0	0	0	0
GM29011	0	0	0	0	0	0	0	0	0	0	0	0	0	0	0	0	0	0
CDH20	0.0123	0	0	0	0	0	0	0	0	0	0	0	0	0	0	0	0	0
GM38031	0	0	0	0	0	0	0	0	0	0	0	0	0	0	0	0	0	0
GM36969	0	0	0	0	0	0	0	0	0	0	0	0	0	0	0	0	0	0
GM15699	0	0	0	0	0	0	0	0	0	0	0	0	0	0	0	0	0	0
GM29012	0	0	0	0	0	0	0	0	0	0	0	0	0	0	0	0	0	0
GM29013	0	0	0	0	0	0	0	0	0	0	0	0	0	0	0	0	0	0
RNF152	0.0058	0	0	0	0	0	0	0	0.0224	0.0162	0.0075	0.0446	0.0842	0.0858	0.0551	0	0	0.0055
GM29014	0	0	0	0	0	0	0	0	0	0	0	0	0	0	0	0	0	0
GM17634	0	0	0	0	0	0	0	0	0	0	0.0389	0	0.0542	0.026	0.0284	0.0292	0	0
GM28403	0.0182	0	0	0	0.0175	0	0	0	0	0.0509	0	0.0468	0	0.0795	0.0347	0	0.0383	0
GM3608	0.9123	0.6012	0.6912	0.6335	0.5481	0.8104	1.0537	1.1626	0.8012	1.256	1.3294	1.4425	0.8166	0.4673	0.8549	0.5071	0.6542	0.4428
PIGN	6.5645	6.9277	6.5596	12.4335	13.2194	13.6528	6.4877	6.5893	5.563	6.3879	6.4848	6.4149	6.2364	6.0784	6.6529	6.4284	6.8341	6.8271
GM28404	0	0	0.1064	0.7106	0	0	0	0	0	0	0	0.14	0.3963	0	0	0	0	0
GM20302	3.7569	4.6862	4.7302	4.6821	5.0058	6.9254	4.8669	3.0205	6.9389	2.7613	4.6835	3.229	5.0596	3.2901	3.7588	5.0946	3.9658	2.8978
GM22426	0	0	0	0	0	0	0	0	0	0	0	0	0	0	0	0	0	0
GM8004	0	0.1741	0	0	0	0.0834	0	0	0	0.1119	0.1044	0.3084	0.1455	0.2793	0	0.0783	0	0.2279
2310035C23RIK	7.0119	7.3648	6.8261	8.0896	9.249	10.3487	4.1772	3.8203	3.7829	4.5634	4.9485	5.0474	3.7135	3.551	3.922	3.0207	2.6787	2.6053
GM37566	0.0339	0.0863	0.0443	0.0277	0.0327	0.0946	0.0461	0.0734	0	0.0317	0.0148	0.0291	0.0103	0.0099	0.0216	0.0222	0	0
GM10193	1.2779	2.092	1.46	1.3935	0.6165	0.8913	0	0.2766	1.1014	1.7931	0.8363	2.1966	0.1943	0.5595	1.017	0.4183	0	0.4059
TNFRSF11A	0.0082	0.0179	0	0	0	0.0172	0	0.032	0	0	0	0.0106	0	0.0072	0.0079	0.0484	0	0
GM37779	0	0	0	0	0	0	0	0	0	0	0	0	0.0133	0	0	0.0143	0	0
GM26214	0	0	0	0	0	0	0	0	0	0	0	0	0	0	0	0	0	0
GM18801	0	0	0	0	0	0	0.1248	0	0	0	0	0	0	0	0	0	0	0
GM7160	1.7013	1.8947	1.836	0.6531	0.536	0.4359	10.7675	11.2731	10.2345	12.1307	13.9066	11.9064	5.0996	5.1993	5.8358	8.1824	9.1259	9.8251
ZCCHC2	7.7638	7.4511	6.2872	4.8231	5.2907	5.8129	6.5102	6.6688	7.2677	7.0826	11.0372	10.5616	5.8439	4.6621	4.7096	4.6214	4.1706	4.5395
GM37372	0	0	0	0.0122	0.0143	0.0311	0	0.0193	0	0.1459	0.0389	0.0192	0	0.013	0.0142	0.0146	0	0.0566
GM26509	0	0	0	0	0	0.0543	0	0.0674	0	0.0728	0	0.2676	0	0	0	0.051	0	0.0989
GM20753	0.2708	0.4926	0.2652	0.1477	0.0871	0.1889	0.2456	0	0	0.38	0.2363	0.3491	0.2471	0	0.0862	0	0	0
PHLPP1	10.5215	10.3701	9.7898	12.1985	13.3507	14.6596	10.8625	10.0405	10.6451	11.7679	16.9674	16.6738	8.0034	7.0829	7.0909	6.0102	4.7919	5.068
GM38235	0.0298	0.0217	0.0292	0.0731	0.0959	0.0728	0.027	0.0645	0.0771	0.0697	0.039	0.0256	0.0544	0.0087	0.0474	0.0195	0.0315	0.0379
A530053M12RIK	0.1341	0.183	0.0985	0.4388	0.5501	0.3158	0.4562	0.6969	0.1734	0.7059	0.7902	0.4324	0.7955	0.6461	0.7366	0.0329	0	0.0959
GM6651	0	0	0.1778	0	0	0.1899	0	0	0.2347	0	0	0	0	0	0	0	0	0
BCL2	4.9536	5.6469	5.1088	4.0601	4.8781	5.0815	3.8952	3.2935	3.4384	8.0514	9.3604	7.536	2.6125	2.2631	2.5553	2.8278	2.5068	2.5903
D630008O14RIK	0	0	0.0703	0	0.0462	0	0.0651	0	0	0.0672	0	0.0308	0	0	0	0	0.0758	0.0228
MIR3473F	0	0	0	0.2959	0	0	0	0	0	0	0	0	0	0.3168	0	0.3552	0	0
GM37053	0.0236	0	0	0.0386	0	0.0247	0	0	0	0	0.0309	0	0	0.0206	0	0.0231	0.0498	0.0898
KDSR	5.7066	6.0702	5.6653	7.6453	7.9591	7.7016	18.194	17.9758	17.1997	5.6348	9.8885	9.5602	4.3082	4.273	4.7637	8.3492	8.5547	9.7009
VPS4B	14.436	15.4484	14.8025	14.0161	14.8991	16.6989	15.9915	15.1829	13.8214	12.3414	19.1928	17.0442	12.0915	11.3069	11.3967	10.3619	10.1651	10.9228
SERPINB5	0	0.0195	0.0175	0.0439	0.0173	0	0.0243	0.0232	0	0.0502	0.0937	0.0231	0.0163	0	0.0342	0	0.0189	0
POU2F3-RS1	0	0	0	0	0	0	0	0	0	0	0	0	0	0	0	0	0	0
SERPINB12	0	0	0	0	0	0	0	0	0	0	0.0258	0	0	0	0	0	0	0
SERPINB13	0	0	0	0	0	0	0.04	0	0	0	0	0	0	0	0	0	0	0
GM8080	0	0	0	0	0	0	0	0	0	0	0	0	0	0	0	0	0	0
SERPINB3A	0	0	0	0	0	0	0	0	0	0	0	0	0	0	0	0	0	0
SERPINB3D	0	0	0	0	0	0	0	0	0	0	0	0	0	0	0	0	0	0
GM15388	0	0	0	0	0	0	0	0	0	0	0	0	0	0	0	0	0	0
SERPINB3B	0	0	0	0	0	0	0	0	0	0	0	0	0	0	0	0	0	0
GM8084	0	0	0	0	0	0	0	0	0	0	0	0	0	0	0	0	0	0
GM15390	0	0	0	0	0	0	0	0	0	0	0	0	0	0	0	0	0	0
SERPINB3C	0	0	0	0	0	0	0	0	0	0	0	0	0	0	0	0	0	0
GM8089	0	0	0	0	0	0	0	0	0	0	0	0	0	0.0445	0	0	0	0
SERPINB11	0	0	0	0	0	0	0	0	0	0	0	0	0	0	0	0	0	0
GM15391	0	0	0	0	0	0	0	0	0	0	0	0	0	0	0	0	0	0
SERPINB7	0.176	0.1646	0.0492	0	0	0	0	0	0	0	0	0	0	0.022	0	0.0494	0	0
GM24553	0	0	0	0	0	0	0	0	0	0	0	0	0	0	0	0	0	0
SERPINB2	0.0419	0.0229	0	0	0	0.0219	0.3988	0.1904	0.3791	0.8523	0.658	0.297	0	0	0.02	0.1028	0.0221	0.02
SERPINB10	0	0	0.0276	0	0	0	0	0	0	0	0	0	0	0	0	0	0	0
SERPINB8	12.3532	14.6809	11.2734	2.8195	3.3164	3.2204	15.2261	14.4049	15.2948	0.5471	0.9133	1.0847	0.4119	0.2696	0.4311	0.5441	0.5199	0.4888
GM15389	0	0	0	0	0	0	0	0	0	0	0	0	0	0	0	0	0	0
GM24267	0	0	0	0	0	0	0	0	0	0	0	0	0	0	0	0	0	0
GM22438	0	0	0	0	0	0	0	0	0	0	0	0	0	0	0	0	0	0
D830032E09RIK	0	0	0	0	0	0	0	0	0	0	0	0	0	0	0	0	0	0
GM18448	0	0	0	0	0	0	0	0	0	0	0	0	0	0	0	0	0	0
GM28282	0	0	0	0	0	0	0	0	0	0	0	0	0	0	0	0	0	0
GM5702	0	0	0	0	0	0	0	0	0	0	0	0	0	0	0	0	0	0.019
GM38212	0	0	0	0	0	0	0	0	0	0	0	0	0	0	0	0	0	0
GM28283	0	0	0	0	0	0	0	0	0	0	0	0	0	0	0	0	0	0
GM6679	0	0	0	0	0	0	0	0	0	0	0	0	0	0	0	0	0	0
GM17847	0	0	0	0	0	0	0	0	0	0	0	0	0	0	0	0	0	0
GM28281	0	0	0	0	0	0	0	0	0	0	0	0	0	0	0	0	0	0
GM22159	0	0	0	0	0	0	0	0	0	0	0	0	0	0	0	0	0	0
GM25293	0	0	0	0	0	0	0	0	0	0	0	0	0	0	0	0	0	0
GM8141	3.2551	3.0229	2.209	2.0083	2.1765	2.838	0.7379	0.7046	0.886	1.6026	1.2708	1.1043	1.0159	0.7002	0.8454	0.6449	0.5124	0.4897
CDH7	0	0	0	0	0	0	0	0	0	0	0	0	0	0	0	0	0	0
GM18552	0	0	0	0	0	0	0	0	0	0	0	0	0	0	0	0	0	0
GM3332	0	0	0	0	0	0	0	0	0	0	0	0	0	0	0	0	0	0
GM6693	0	0	0	0	0	0	0	0	0	0	0	0	0	0	0	0	0	0
CDH19	79.394	72.0875	81.9145	132.733	138.348	141.164	0.1407	0.1642	0.104	0	0.015	0.1778	0	0.2315	0.0988	0.0677	0.1213	0
GM38255	0.2956	0.1971	0.1447	0.4566	0.6338	0.2749	0	0	0	0	0	0	0	0	0	0	0	0
GM36944	0.1605	0.1168	0.2095	0.2771	0.3441	0.2798	0	0	0	0	0	0	0	0	0	0	0	0
GM29088	0	0	0	0	0	0	0.1152	0	0	0.3565	0.5542	0	0	0	0	0	0	0
GM19927	0	0	0	0	0	0	0	0	0	0	0.0825	0	0	0	0	0	0	0
GM8173	0.0498	0.0272	0.0975	0.0204	0.096	0.026	0.0677	0.097	0.1609	0.2793	0.0326	0.0962	0.0454	0	0	0.0489	0.0263	0
GM37934	0	0	0	0	0	0	0	0	0	0	0	0	0	0	0	0	0	0
DSEL	10.1929	11.1155	10.6339	2.3389	2.0592	2.3669	9.185	8.5926	8.918	13.0207	14.4373	11.589	5.0078	4.0221	4.5656	2.8418	2.8206	2.7737
GM6028	1.1142	0.8419	1.259	1.6824	1.3232	1.1658	2.0985	1.6698	1.9946	1.2027	1.1219	0.663	1.7203	1.4261	1.8827	1.2625	1.7191	1.7966
GM17752	0	0	0	0.0108	0	0	0	0	0	0	0.0173	0	0	0	0	0	0	0
GM6717	0	0	0	0	0	0.0614	0.0799	0	0	0	0	0	0	0	0	0.0576	0	0
GM19086	0	0	0	0	0	0	0	0	0	0	0	0	0	0	0	0	0	0
GM18406	0	0	0	0	0.071	0	0	0	0	0.1032	0	0	0	0	0	0	0	0
GM22331	0	0	0	0	0	0	0	0	0	0	0	0	0	0	0	0	0	0
GM8204	0	0	0	0	0	0	0	0	0	0	0	0	0.2093	0.201	0.1096	0	0	0.0219
GM28190	0	0	0	0	0	0	0	0	0	0	0	0	0.0622	0	0	0	0	0
GM28189	0	0	0	0	0	0	0	0	0	0	0	0	0	0	0	0	0	0
GM17946	0	0	0	0	0	0	0	0	0	0	0	0	0	0	0	0	0	0
GM18181	0	0	0	0	0	0	0	0	0	0	0	0	0	0	0	0	0	0
GM24937	0	0	0	0	0	0	0	0	0	0	0	0	0	0	0	0	0	0
9330185C12RIK	0	0	0	0	0	0	0	0	0	0	0	0	0	0	0	0	0	0
GM4854	0	0	0	0	0	0	0	0	0	0	0	0	0	0	0	0	0	0
GM17916	0	0	0	0	0	0	0	0	0	0	0	0	0	0	0	0	0	0
CNTNAP5A	0.0045	0	0	0	0	0.0047	0	0	0	0	0	0	0	0	0	0.075	0.0237	0.0471
GM23393	0	0	0	0	0	0	0	0	0	0	0	0	0	0	0	0	0	0
GM28263	0	0	0	0	0	0	0	0	0	0	0	0	0	0	0	0	0	0
GM19965	0	0	0	0	0	0	0	0	0	0	0	0	0	0	0	0	0	0
GM17777	0	0	0	0	0	0	0	0	0	0	0	0	0	0	0	0	0	0
GM24030	0	0	0	0	0	0	0	0	0	0	0	0	0	0	0	0	0	0
GM27785	0.4472	0	0	0	0	0	0	0	0	0	0	0	0	0	0	0	0	0
GM28361	0	0	0	0	0	0	0	0	0	0	0	0	0	0	0	0	0	0
ZFP813-PS	0	0	0	0	0	0	0	0	0	0	0	0	0	0	0	0	0	0.0759
GM28362	0	0	0	0	0	0	0	0	0	0	0	0	0	0	0	0	0	0
GM28363	0	0	0	0	0	0	0	0	0	0	0	0	0	0	0	0	0	0
GM28359	0	0	0	0	0	0	0	0	0	0	0	0	0	0	0	0	0	0
GM18182	0	0	0	0	0	0	0	0.0511	0	0	0	0	0	0	0	0	0	0
B020011L13RIK	0	0	0	0	0	0	0	0	0	0	0	0	0	0	0	0	0	0
GM28360	0	0	0	0	0	0	0	0	0	0	0	0	0	0	0	0	0	0
GM28169	0	0.3113	0	0	0	0	0	0	0	0	0	0	0	0	0	0	0	0
GM7195	0	0	0	0	0	0	0	0	0	0	0	0	0	0	0	0	0	0
GM28168	0	0	0	0	0	0	0	0	0	0	0	0	0	0	0	0	0	0
GM7145	0	0	0	0	0	0	0	0	0	0	0	0	0	0	0	0	0	0
GM28358	0	0	0	0	0	0	0	0	0	0	0	0	0	0	0	0	0	0
GM29489	0	0	0	0	0	0	0	0	0	0	0	0	0	0	0	0	0	0
GM29490	0	0	0	0	0	0	0	0	0	0	0	0.1855	0	0.126	0	0	0	0
GM29104	0	0	0	0	0	0	0	0	0	0	0	0	0	0	0	0	0	0
GM29106	0.0736	0.0535	0.1081	0.1906	0.2603	0.3207	0.05	0.1115	0.0476	1.1012	1.0112	0.7588	0.1566	0.0644	0.1288	0	0.0129	0
GM7200	0.0423	0	0.1657	0.0346	0	0.0885	0	0	0.0547	0	0.0554	0	0	0.1482	0.0404	0.0831	0	0.0806
TSN	30.3092	32.1841	31.4709	31.1981	32.8233	35.6255	15.1652	14.7484	14.3724	23.6418	24.0264	22.1563	23.0766	20.2609	21.176	13.095	13.8015	12.587
NIFK	114.894	120.781	121.537	108.976	108.563	111.72	34.26	37.8172	33.082	96.2593	83.4385	74.11	89.081	78.4725	84.1667	57.2104	61.2895	58.2789
GM28867	0	0	0	0	0	0	0	0	0.0294	0	0	0	0	0	0	0	0	0
CLASP1	5.1328	5.3071	4.9868	4.069	4.6048	4.9436	4.1174	3.6768	4.4377	5.6663	6.984	6.3937	4.5697	3.639	3.691	3.4678	3.143	3.0773
GM26080	0	0	0	0.3071	0.3624	0.3929	0	0	0	0.527	0	0	0	0	0	0	0.7929	0.3578
2900060B14RIK	2.3161	3.138	1.8771	5.0296	4.2383	6.1834	2.8245	2.0745	2.788	10.4221	9.3042	6.7956	4.226	4.4063	4.2714	0.2353	0.7588	0.761
GM22710	0	0	0	0	0	0	0	0	0	0	0	0	0	0	0	0	0	0
GM28466	0.0747	0.0815	0	0	0	0.1562	0	0	0	0.3143	0	0	0.0681	0.0654	0	0.0733	0	0
TFCP2L1	1.6889	1.7125	1.9041	0.7034	0.6639	0.7308	0	0.0068	0.0135	0.0073	0.0614	0.0067	0	0.0091	0	0.0102	0.0055	0.0099
GM28882	0	0	0	0	0	0	0	0	0	0	0	0	0	0	0	0	0	0
GM23497	0	0	0	0	0	0	0	0	0	0	0	0	0	0	0	0	0	0
GM28467	0	0	0	0	0	0	0	0	0	0	0	0	0	0	0	0	0	0
GLI2	0	0.0156	0.0281	0.0059	0	0	0	0	0	0	0	0	0.0327	0.0188	0.0137	0.007	0.0076	0
MIR6346	0	0	0	0	0	0	0	0	0	0	0	0	0	0	0	0	0	0
GM26831	0	0	0	0	0	0	0	0	0	0	0	0	0	0	0	0	0	0
GM8321	0	0	0	0	0	0	0	0	0	0	0	0	0	0	0	0	0	0
GM3508	0.3106	0	0.1217	0.1016	0.2397	0.065	0	0	0	0.0872	0.0813	0	0	0	0	0	0	0.1776
GM29456	0	0	0	0	0	0	0	0	0	0	0	0	0	0	0	0	0	0
GM29455	0	0	0	0	0	0	0	0	0	0	0	0	0	0	0	0	0	0
INHBB	0	0	0	0	0	0	0	0	0	0	0	0	0	0	0	0	0	0
RALB	21.585	22.1753	21.5483	16.7883	16.6672	16.9869	19.9536	17.9893	18.7079	22.6422	24.7925	23.5049	23.006	22.6695	24.8935	23.0969	22.9645	22.3635
GM29454	0	0	0	0	0	0	0	0	0	0.1757	0	0.3228	0	0.1096	0	0	0.1321	0.2386
GM27184	0.8105	0.5308	0.635	0.9943	0.782	0.1696	0.1102	0.1053	0.3144	0	0.4244	0.6269	0	0	0.0774	0	0	0
TMEM185B	28.17	28.597	27.7401	25.6465	24.9953	28.853	5.7346	5.7017	5.4732	16.7448	17.1028	16.5303	0.0159	0.0305	0	0	0.0368	0.0166
3830432H09RIK	0	0.0407	0.0183	0.0305	0.072	0.0586	0.1015	0	0.0482	0.0524	0	0.0481	0	0	0	0	0	0
GM25322	0	0	0	0	0	0	0	0	0	0	0	0	0	0	0	0	0	0
EPB41L5	1.4368	1.4699	1.5866	1.1533	1.0872	1.3044	1.5145	1.563	1.4913	1.2302	1.8763	1.6202	1.2013	0.9225	1.1843	0.3568	0.3202	0.4288
GM37219	0	0.058	0	0	0.1025	0	0	0	0.1374	0	0	0	0	0.0465	0	0	0	0
PTPN4	7.9787	8.95	9.0816	7.876	8.9395	11.3757	5.1249	4.3741	4.9499	6.2868	7.2128	6.0339	3.8457	3.2995	3.507	3.0255	3.6378	3.6313
GM3851	0.3094	0	0	0.2531	0	0.1619	0	0.2009	0	0	0	0.1995	0	0.4065	0	0.4558	0	0.2948
GM37745	0	0.0592	0.0059	0.0148	0.0291	0.0189	0.0164	0.0235	0.0545	0.0423	0.0079	0.0078	0.033	0.0053	0.046	0.0059	0.0191	0.0345
GM29657	0	0	0	0	0	0	0	0	0	0	0	0	0	0	0	0	0	0
GM8338	0	0	0	0	0	0	0.1844	1.0561	0	0.1902	0.3548	0	0	0	0	0.1331	0	0
GM29658	0	0	0	0	0	0	0	0	0	0	0	0	0	0	0	0	0	0
GM3551	0.0741	0	0	0.1212	0.0715	0	0	0	0	0	0	0	0	0.1298	0.0708	0	0	0
GM28209	0	0	0	0	0	0	0	0.1649	0	0	0	0	0	0	0	0	0	0
TMEM177	6.3761	7.2644	6.518	7.7558	7.8002	8.5659	6.7901	6.0434	6.6063	5.9921	7.0354	7.0811	5.293	5.6096	6.3987	5.032	4.8809	4.7283
CFAP221	0	0	0	0	0	0	0	0	0	0	0	0	0	0	0	0.0166	0	0
GM17973	0	0	0	0	0	0	0	0	0	0	0	0	0	0	0	0	0	0
SCTR	0	0	0	0	0.0236	0.0256	0	0	0	0	0	0	0	0	0.0234	0	0.0258	0
TMEM37	13.1343	16.3831	14.6262	8.1639	6.4089	6.8316	3.3689	2.7781	2.8625	1.4744	1.0807	1.2095	4.9984	6.1784	7.4545	2.3216	1.9807	2.7532
DBI	966.234	966.708	1003.24	2061.51	1990.7	1898.83	127.768	122.085	115.315	198.166	190.793	178.101	166.465	166.429	169.041	98.1838	100.398	89.7962
3110009E18RIK	2.7354	2.7202	2.5597	5.4356	5.572	4.9819	0.8544	0.6053	0.8645	1.1088	0.8753	1.3323	2.5325	1.9164	2.864	1.9499	2.1389	2.3554
STEAP3	4.0202	4.6978	4.1224	5.6394	6.0551	6.3406	2.0609	1.8448	1.9032	0.6885	1.3635	1.1875	3.8168	2.9326	3.2721	2.35	1.9356	2.2556
C1QL2	0	0	0	0	0	0	0	0	0	0	0	0	0	0	0	0	0	0
1700012E03RIK	0	0	0	0	0	0	0	0	0	0	0	0	0	0	0	0	0	0
MARCO	0	0	0.025	0	0	0	0	0	0	0	0	0	0	0	0	0	0	0
EN1	0.0375	0	0	0.0153	0.0181	0.0196	18.6426	16.8749	17.4531	14.9167	25.3026	21.8027	9.459	8.0126	8.559	8.7084	7.3625	6.6277
2610027F03RIK	0	0	0	0	0	0	0	0	0	0	0.0568	0.056	0	0	0	0	0	0
GM29346	0.5788	0.6317	0.5668	0.3156	0	0.4037	1.5746	1.754	1.2472	4.6022	8.5864	7.9593	1.4081	1.8585	0.9213	0.1895	0.611	0.5515
GM29345	0	0	0	0	0	0	0	0	0	0	0	0	0	0	0	0	0	0
GM29344	0	0	0	0	0	0	0	0	0	0	0	0	0	0	0	0	0	0
GM29348	0	0	0	0	0	0	0	0	0	0	0	0	0	0	0	0	0	0.1203
GM29347	0	0	0	0	0	0	0	0	0	0	0	0	0	0	0	0	0	0
GM37043	0	0	0	0	0	0	0	0	0	0	0	0	0	0	0	0	0	0
CELRR	0	0	0	0	0	0	0	0	0.0164	0	0.0332	0	0	0	0	0.0249	0	0
GM29359	0	0	0	0	0	0	0	0	0.1285	0	0	0	0	0	0	0.0976	0	0
GM38283	0	0	0	0.0579	0	0.1481	0	0	0	0	0	0	0	0	0	0	0	0.2023
INSIG2	5.7796	6.7873	6.4645	6.4995	6.465	5.8245	8.6515	7.1936	8.2782	3.8164	6.8978	6.5745	10.2095	9.5398	10.2142	10.2102	10.2282	9.1916
GM37174	0.0804	0.2107	0.0945	0.0658	0.1552	0.0673	0.3283	0.3134	0.1664	0.0451	0.2106	0.1867	0.4256	0.3663	0.4302	0.5687	0.3736	0.3066
2210011K15RIK	0.0283	0	0	0	0	0.0591	0	0.0367	0	0.0397	0	0	1.289	0.7424	0.8906	0.222	0.2088	0.1615
CCDC93	5.9664	5.9067	5.9355	3.157	3.6499	3.9397	5.3793	5.0804	5.0519	5.6517	6.5495	6.0849	6.157	5.7672	6.0184	6.0066	5.477	5.9839
GM15392	0.1265	0.2761	0.0619	0.1034	0	0.0662	0.086	0	0	0	0.0828	0.163	0.0577	0.0554	0.2416	0	0.2003	0.1205
GM15393	0.2246	0.4904	0.88	0	0.2168	0	0	0	0.2904	0.6304	0	0	0	0	0.2145	0	0.2371	0
HTR5B	0.0509	0	0	0	0	0.0266	0	0	0.0986	0	0	0	0.0464	0	0.0486	0	0	0.0485
GM8217	0	0	0	0	0	0	0	0	0	0	0	0	0	0	0	0	0	0
DDX18	46.7009	47.1214	40.9798	37.9516	39.8986	42.3305	29.7539	28.95	27.9224	29.6649	53.7124	52.723	26.4273	22.2969	21.7611	16.1489	15.2266	15.5939
GM28591	0	0	0	0	0	0	0	0	0	0	0	0	0	0	0	0	0	0
GM37920	0	0	0	0	0	0	0	0	0	0	0	0	0	0	0	0	0	0
GM15394	0	0	0	0	0	0	0	0	0	0	0	0	0	0	0	0	0	0
GM8392	0	0.0643	0	0.0482	0.1705	0.1849	0	0.153	0.1524	0	0	0.076	0	0	0.1125	0	0.0622	0
GM26472	0	0	0	0	0	0	0	0	0	0	0	0	0	0	0	0	0	0
GM28590	0	0	0	0	0	0	0	0	0	0	0	0	0	0	0	0	0	0
GM24547	0	0	0	0	0	0	0	0	0	0	0	0	0	0	0	0	0	0
GM36982	0	0	0	0	0	0	0	0	0	0	0	0	0	0	0	0	0	0
GM25771	0	0	0	0	0	0	0	0	0	0	0	0	0	0	0	0	0	0
GM29192	0	0	0	0	0	0	0	0	0	0	0	0	0	0	0	0	0	0
GM37970	0	0	0	0	0	0	0	0	0	0	0	0	0	0	0	0	0	0
GM8403	0	0	0	0	0	0	0	0	0	0	0	0	0	0	0	0	0	0
GM28911	23.5475	16.5217	21.8244	20.978	26.7775	18.9172	22.3065	21.8447	23.3769	21.8309	14.3106	16.8052	26.4695	29.0911	35.7408	26.4263	27.5204	28.4461
GM20058	0	0	0	0	0	0	0	0	0	0	0	0	0	0	0	0	0	0
GM28912	0	0	0	0	0	0	0	0	0	0	0	0	0	0	0	0	0	0
DPP10	0	0.0102	0.0031	0.0076	0.003	0.0065	0	0.0081	0	0	0.0041	0.0121	0	0	0	0	0	0.003
GM37478	0	0	0	0	0	0	0	0	0	0	0	0	0	0	0	0	0	0
GM37221	0	0	0	0	0	0	0	0	0	0	0	0	0	0.0143	0	0	0	0
GM24791	0	0	0	0	0	0	0	0	0	0	0	0	0	0	0	0	0	0
GM37066	0	0	0	0	0	0	0	0	0	0	0	0	0	0	0	0	0	0
GM37781	0	0	0	0	0	0	0	0	0.0198	0	0	0	0	0	0	0	0	0
GM37396	0	0	0	0	0	0	0	0	0	0	0	0	0	0	0	0	0	0
GM38263	0	0	0	0	0	0	0	0	0	0.0226	0	0	0	0	0	0	0	0
GM28929	0	0	0	0	0	0	0	0	0	0	0	0	0	0	0	0	0	0
GM18875	0	0	0	0	0	0	0	0	0	0	0	0	0	0	0	0	0	0
GM37551	0	0	0	0	0	0	0	0	0	0	0	0	0	0	0	0	0	0
GM38073	0	0	0	0	0	0	0.0183	0	0	0	0	0	0	0	0	0	0	0
GM25578	0	0	0	0.3869	0.4564	0	0	0	0	0	0	0	0	0	0	0	0	0
GM28928	0	0	0	0	0	0	0	0	0	0.0957	0	0	0	0	0	0	0	0
GM28299	0	0	0	0	0	0	0.1974	0	0	0	0	0	0	0	0	0	0	0
GM37717	0	0	0	0	0	0	0	0	0	0	0.0213	0	0	0	0	0	0	0
1700121L03RIK	0	0	0	0	0	0	0	0	0	0	0	0	0	0	0	0	0	0
ACTR3	158.545	171.29	163.584	138.686	142.182	150.36	150.529	144.086	137.666	156.833	182.402	161.503	67.2907	59.7188	64.1721	50.4699	56.195	53.4554
GM28706	0	0.1513	0	0	0	0	0	0	0	0	0	0	0	0	0	0	0	0
SLC35F5	15.3617	15.0406	16.2659	13.4484	13.7783	14.592	14.1491	13.8556	11.8994	13.3114	17.4501	15.9638	10.1275	8.9929	9.8071	6.7824	7.7303	8.2461
GM18444	0	0	0	0	0	0	0	0	0	0	0	0	0	0	0	0	0	0
GPR39	0	0	0.0639	0	0	0	0.0888	0.1695	0.1899	0.0916	0.0854	0.0421	1.5184	1.529	1.4493	0.2243	0.2928	0.3576
LYPD1	0	0	0	0	0	0.0073	0	0	0	0	0	0	0.0064	0.0122	0.02	0.0069	0	0.0067
NCKAP5	0.2318	0.2041	0.211	0.2228	0.2354	0.268	0.0221	0	0	0	0	0	0.4229	0.178	0.3029	0.8784	0.7254	0.9143
GM37161	0	0	0	0	0	0	0	0	0	0	0	0	0	0	0.0348	0.0358	0	0.0348
GM37936	0.0744	0.0406	0	0	0	0	0	0	0	0	0	0	0	0	0.1066	0	0	0.0355
GM38177	0	0	0	0	0	0	0	0	0	0	0	0	0	0	0.0452	0	0	0.0901
4930599A14RIK	0	0	0	0	0	0	0	0	0	0	0	0	0	0	0	0	0	0
GM5261	0	0	0	0	0	0	0	0	0	0	0	0	0	0	0	0	0	0
MGAT5	3.5042	3.8194	3.0618	1.9237	2.0342	2.3308	3.3424	2.7754	3.5354	3.032	4.6182	4.265	2.5471	1.9342	1.8126	1.7792	1.297	1.4075
GM37772	0	0.0385	0	0	0	0	0	0	0.0456	0	0	0	0	0	0	0	0.0373	0
GM37510	0.0207	0	0.0202	0.0084	0.0199	0.0108	0	0	0.0267	0	0.027	0.0133	0.0094	0.0181	0	0	0.0109	0.0197
GM8451	12.7671	10.5709	13.796	9.6315	11.0443	9.6727	20.3603	24.5863	21.7715	18.9956	15.2711	13.7636	15.0614	16.0964	14.9259	13.5096	16.8465	15.2059
[truncated: 47,031 more rows]
